# **Jag1 modulates an oscillatory Dll1-Notch-Hes1 signaling module to coordinate growth and fate of pancreatic progenitors**

by

Philip A. Seymour<sup>1†</sup>, Caitlin A. Collin<sup>1‡§</sup>, Anuska I. R. Egeskov-Madsen<sup>1†</sup>, Mette C. Jørgensen<sup>1</sup>, Hiromi Shimojo<sup>2</sup>, Itaru Imayoshi<sup>2</sup>, Kristian H. de Lichtenberg<sup>1#</sup>, Raphael Kopan<sup>3</sup>, Ryoichiro Kageyama<sup>2</sup> and Palle Serup<sup>1\*</sup>

<sup>1</sup>Novo Nordisk Foundation Center for Stem Cell Biology (DanStem), University of Copenhagen, Blegdamsvej 3B, DK-2200, Copenhagen N, Denmark.

<sup>2</sup>Institute for Frontier Life and Medical Sciences, Kyoto University, Kyoto, 606-8507, Japan.

<sup>3</sup>Division of Developmental Biology, Cincinnati Children's Hospital Medical Center, Cincinnati, OH 45229, USA.

<sup>†</sup>P.A.S., C.A.C. and A.I.R.E-M are shared first authors.

<sup>§</sup>Present address: Ocular Genomics Institute, Massachusetts Eye and Ear, Harvard Medical School, Boston, MA 02114, USA.

<sup>#</sup>Present address: Novo Nordisk Foundation Center for Basic Metabolic Research, University of Copenhagen, Blegdamsvej 3B, DK-2200, Copenhagen N, Denmark.

\*Corresponding author:

Address: NNF Center for Stem Cell Biology

Panum Institute

Blegdamsvej 3B

Building 6.5.22

DK-2200 Copenhagen, Denmark

E-mail: [palle.serup@sund.ku.dk](mailto:palle.serup@sund.ku.dk)

Telephone: +45 40 22 00 26

1 **Summary**

2 Notch signaling controls proliferation of multipotent pancreatic progenitor cells  
3 (MPCs) and their segregation into bipotent progenitors (BPs) and unipotent pro-acinar  
4 cells (PACs). Here we uncover fast ultradian oscillations in the ligand Dll1, and the  
5 transcriptional effector Hes1, which proved crucial for MPC expansion. Conversely  
6 Jag1, a uniformly expressed ligand, curbed MPC growth, but as expression later  
7 segregated to PACs it proved critical for specifying all but the most proximal 5% of BPs,  
8 while BPs were entirely lost in *Jag1*, *Dll1* double mutants. Moreover, experimentally  
9 induced changes in Hes1 oscillation parameters was associated with selective  
10 adoption of BP or PAC fates. Anatomically, ductal morphogenesis and organ  
11 architecture is minimally perturbed in *Jag1* mutants until later stages, when ductal  
12 remodeling fails and signs of acinar-to-ductal metaplasia appear. Our study uncovers  
13 oscillating Notch activity in the developing pancreas, which along with modulation by  
14 Jag1 is required to coordinate MPC growth and fate.

15

16 **Keywords** Notch, oscillations, cis-inhibition, pancreas, development, fate, Dll1, Jag1,  
17 Hes1

## 21 Introduction

22 Deciphering the mechanisms that control the differentiation of progenitor cells into  
23 various mature cell types is crucial for understanding disease etiology and for using  
24 pluripotent stem cells in cell replacement therapy applications. The principal cell  
25 lineages of the mammalian pancreas, acinar, duct and endocrine, arise from  
26 multipotent pancreatic progenitor cells (MPCs) through a series of binary cell fate  
27 choices (Shih et al., 2013). MPCs are specified from the posterior foregut endoderm  
28 as dorsal and ventral anlagen around embryonic day (E)8.5 (Wessells and Cohen,  
29 1967), and are distinguished by their expression of several transcription factors  
30 including Pdx1, Ptf1a, Hnf1 $\beta$ , Sox9 and Nkx6-1. The multipotentiality of these cells has  
31 been demonstrated at the population level by many lineage-tracing studies (Gu et al.,  
32 2002; Kopp et al., 2011; Pan et al., 2013; Solar et al., 2009; Zhou et al., 2007) and, more  
33 recently, at the clonal level (Larsen et al., 2017).

34 Dorsal MPCs give rise to an early wave of endocrine cells from ~E9.5 to ~E11 while  
35 endocrinogenesis is delayed ~36 hours in the ventral anlage (Ahlgren et al., 1997;  
36 Pictet et al., 1972; Spooner et al., 1970). The appearance of hormone-producing cells  
37 is preceded by, and dependent on, expression of *Neurog3* (encoding Ngn3) in  
38 endocrine precursors, which initiates at ~E8.5 in the dorsal bud and ~E10.0 in the  
39 ventral bud (Gradwohl et al., 2000; Gu et al., 2002; Villasenor et al., 2008). A transient  
40 decline in *Neurog3* expression from E11 to E12 (Villasenor et al., 2008) coincide with  
41 peak segregation of Ptf1a<sup>+</sup>Nkx6-1<sup>+</sup> MPCs into proximal, Ptf1a<sup>-</sup>Nkx6-1<sup>+</sup> bipotent  
42 progenitors (BPs) and distal, Ptf1a<sup>+</sup>Nkx6-1<sup>-</sup> pro-acinar cells (PACs) (Hald et al., 2008;  
43 Schaffer et al., 2010). This proximodistal (PD) patterning is regulated by Notch  
44 signaling as forced expression of a Notch intracellular domain (NICD) prevents MPCs  
45 from adopting a PAC fate (Hald et al., 2003; Murtaugh et al., 2003; Schaffer et al., 2010)  
46 while dominant-negative Maml1 prevents a BP fate (Afelik et al., 2012; Horn et al.,  
47 2012). Total inactivation of Notch signaling in the endoderm, as seen in *Foxa2*<sup>T2AiCre/+</sup>;  
48 *Mib1*<sup>f/f</sup> (*Mib1* <sup>$\Delta$ Foxa2</sup>) embryos, results in a complete shift from BP- to PAC fate (Horn et  
49 al., 2012). Downstream of Notch, PD patterning depends on mutually antagonistic  
50 interactions between Ptf1a and Nkx6-1/Nkx6-2 (Schaffer et al., 2010). Notch, and its  
51 downstream target gene *Hes1*, also prevent precocious and excessive endocrine

52 differentiation (Apelqvist et al., 1999; Jensen et al., 2000b) and stimulate MPC  
53 proliferation (Ahnfelt-Rønne et al., 2012). After PD patterning is complete around E14,  
54 Notch signaling and Hes1 expression persist in BPs, maintaining Sox9 expression and  
55 ductal fate, and inhibiting endocrine differentiation by repressing *Neurog3* (Bankaitis  
56 et al., 2015; Klinck et al., 2011; Kopinke et al., 2011; Magenheim et al., 2011; Shih et  
57 al., 2012). Less is known about which ligands regulate the adoption of distinct cell fates.  
58 Dll1 regulates early endocrine differentiation (Ahnfelt-Rønne et al., 2012; Apelqvist et  
59 al., 1999), yet PD patterning appears unaffected in *Dll1*<sup>ΔFoxa2</sup> embryos and the  
60 endocrinogenic phenotype of E10.5 *Dll1*<sup>ΔFoxa2</sup> embryos is much weaker than that of  
61 E10.5 *Mib1*<sup>ΔFoxa2</sup> embryos (Horn et al., 2012; Jorgensen et al., 2018). These findings  
62 show that additional Mib1 substrates, most likely other Notch ligands, are involved in  
63 these cell fate decisions. In zebrafish, intrapancreatic duct cells are depleted in  
64 *jag1b/jag2b* morphants (Lorent et al., 2004; Yee et al., 2005) and completely absent  
65 from *jag1b*<sup>-/-</sup>; *jag2b*<sup>-/-</sup> embryos (Zhang et al., 2017) with the latter also showing a  
66 reduction in endocrine cells while acinar cells were unaffected. However, in mice Jag1  
67 is the only Jagged-type ligand expressed in the pancreatic endoderm (Lammert et al.,  
68 2000), and *Jag1*<sup>ΔPdx1</sup> animals displayed ductal malformation and paucity postnatally,  
69 due to reduced duct cell proliferation (Golson et al., 2009b). Similarly, *Dll1; Jag1*<sup>ΔPtf1a</sup>  
70 embryos showed a modest phenotype with loss of only the terminal duct or  
71 centroacinar cells (CACs) (Nakano et al., 2015). Thus, which ligands that regulate the  
72 various cell fate decisions remains unclear as do dynamics and timing of Notch  
73 signaling. In this study, we uncover a complex interaction between Dll1 and Jag1 that  
74 regulates growth and differentiation of pancreatic progenitors. We demonstrate that  
75 Dll1 and Hes1 expression oscillates and that oscillations are important for progenitor  
76 expansion and fate choice. Conversely, we find uniformly expressed Jag1 to attenuate  
77 Notch activity cell-autonomously. Yet, Jag1 can activate Notch in Jag1<sup>-</sup> neighbors, in  
78 partial redundancy with Dll1, and together the two ligands specify the entire BP  
79 lineage. Anatomically, epithelial plexus formation and the gross architecture of the  
80 organ are remarkably unperturbed in spite of the profound changes in cell fate.  
81 However, at late stages larger ducts are missing or malformed, terminal ducts are  
82 morphologically abnormal and signs of acinar-to-ductal metaplasia (ADM) appear in  
83 *Jag1*<sup>ΔFoxa2</sup> embryos.

## 84 **Results**

85 **Initially uniform Jag1 expression segregates to nascent PACs.** Since BPs are converted  
86 to PACs in *Mib1*<sup>ΔFoxa2</sup> embryos, but not in *Dll1*<sup>ΔFoxa2</sup> embryos (Horn et al., 2012), we  
87 reasoned that an additional Mib1 substrate, most likely Jag1 (Ahnfelt-Rønne et al.,  
88 2012; Apelqvist et al., 1999; Golson et al., 2009a; Jensen et al., 2000a; Lammert et al.,  
89 2000; Nakano et al., 2015), must act during PD patterning. Because the reported  
90 expression patterns are not entirely consistent, we decided to re-analyze the  
91 expression of these two ligands using fluorescent protein reporters targeted to the  
92 *Dll1* and *Jag1* loci. The *Jag1*<sup>J1V<sub>mC</sub></sup> and *Dll1*<sup>D1V<sub>mC</sub></sup> alleles comprise a Venus-T2A-mCherry  
93 cassette inserted in frame with the coding region of the last exons to generate Dll1-  
94 and Jag1-Venus fusion proteins that serve as dynamic reporters of ligand protein  
95 expression while mCherry acts as a more sensitive reporter owing to its longer half-  
96 life after being cleaved from the fusion protein. Co-immunofluorescence (IF) analysis  
97 with anti-GFP antibodies revealed uniform Jag1-Venus fusion protein expression in  
98 E10.5 *Jag1*<sup>J1V<sub>mC</sub>/+</sup> Pdx1<sup>+</sup>Sox9<sup>+</sup> MPCs in the dorsal pancreas epithelium and weaker  
99 expression in the surrounding mesenchyme and a restriction to the distal epithelium  
100 at E12.5, with most of the centrally located, emerging Sox9<sup>+</sup> BPs being negative for  
101 Jag1-Venus. At E15.5, Jag1-Venus expression was detected apically in acinar cells and  
102 in non-parenchymal cells, including the vasculature, but expression was excluded from  
103 Sox9<sup>+</sup> BPs and Pdx1<sup>Hi</sup> β-cells (Figure 1A). In *Dll1*<sup>D1V<sub>mC</sub></sup> embryos we detected Dll1-Venus  
104 fusion protein in scattered cells throughout the E10.5 and E12.5 dorsal pancreatic  
105 epithelium, some of which were Sox9<sup>Lo/-</sup>, and by E15.5, Dll1-Venus was found  
106 intracellularly in the apical pole of acinar cells, and in dispersed Sox9<sup>Lo/-</sup> cells in the  
107 proximal epithelium that likely represent endocrine precursors (Figure 1A). Anti-RFP  
108 antibodies confirmed these expression patterns and further revealed onset of Jag1  
109 expression in MPCs between E9.5 and E10.5 (Figure S1A). Similarly, validated anti-Jag1  
110 and anti-Dll1 antibodies (see Methods, Figure S7A-7L) reproduced the expression  
111 patterns of the Jag1- and Dll1-reporters in wild type pancreas, and IF analysis of  
112 lineage markers confirmed Jag1 expression in vascular cells and acinar cells at E15.5,  
113 and its absence from E15.5 Sox9<sup>+</sup> BPs and from the endocrine lineage at all stages  
114 (Figure S1B). Equally, Dll1<sup>+</sup> cells could be divided into subpopulations comprising  
115 Dll1<sup>+</sup>Ptf1a<sup>+</sup> MPCs or PACs present in E10.5, E12.5, and E15.5 pancreas epithelium as

116 well as Dll1<sup>+</sup>Ngn3<sup>+</sup> endocrine precursors, evident at all stages, and Dll1<sup>+</sup>Ngn3<sup>-</sup> cells in  
117 E12.5 proximal epithelium (Figure S1C). Lastly, co-expression of Dll1 and Jag1 was  
118 evident in some E10.5 MPCs and in a subset of distal cells at E12.5 (Figures 1B and 1C).  
119 Co-IF for Jag1, Dll1, Ptf1a and Nkx6-1 revealed that these were Ptf1a<sup>+</sup>Nkx6-1<sup>Lo/-</sup>  
120 nascent PACs and MPCs and in the proximal region Dll1<sup>+</sup> cells were Ptf1a<sup>-</sup>Jag1<sup>-</sup> and  
121 either Nkx6-1<sup>+</sup> or Nkx6-1<sup>-</sup> (Figure 1C).

122

123 **Notch activity is suppressed in nascent PACs.** We next examined the distribution of  
124 Notch1 and Notch2 in emerging BPs and PACs of the E12.5 pancreatic epithelium.  
125 While Notch1 was expressed in PACs and BPs, Notch2 was specifically enriched in BPs  
126 (Figure 1D), as previously noted in E15.5 pancreas (Shih et al., 2012). To identify cells  
127 in which Notch1 had been activated before and during PD patterning we first analyzed  
128 embryonic pancreata from the Notch1 activity-trap mouse line N1IP::Cre<sup>HI</sup>; Rosa26<sup>LSL-</sup>  
129 <sup>Ai3</sup> in which EYFP permanently labels the progeny of cells experiencing Notch1  
130 activation (Liu et al., 2015). We detected YFP labeling in a few E10.5 Ptf1a<sup>+</sup>Sox9<sup>+</sup> MPCs  
131 and at E12.5 we found YFP expression in Ptf1a<sup>+</sup> nascent PACs, Sox9<sup>+</sup> nascent BPs and  
132 in Ptf1a<sup>+</sup>Sox9<sup>+</sup> MPCs (Figure 1E). Quantification revealed that YFP<sup>+</sup> cell distribution  
133 reflected no bias towards either nascent BPs or PACs at E12.5, consistent with the cells  
134 experiencing Notch1 activation in MPCs, from which both lineages derive, prior to the  
135 lineage segregation occurring by E12.5. We next analyzed Hes1 expression as an acute  
136 readout of general, pan-Notch activation in relation to ligand protein expression in  
137 E12.5 MPCs and emerging Nkx6-1<sup>+</sup> BPs and Ptf1a<sup>+</sup> PACs. Most Hes1<sup>Hi</sup> cells were Nkx6-  
138 1<sup>Hi</sup>Ptf1a<sup>Lo/-</sup>Jag1<sup>Lo/-</sup> BPs and most Hes1<sup>Lo/-</sup> cells were Nkx6-1<sup>Lo/-</sup>Ptf1a<sup>Hi</sup>Jag1<sup>Hi</sup> PACs  
139 except for a few Hes1<sup>Lo/-</sup> cells that were Nkx6-1<sup>Hi</sup>Ptf1a<sup>Hi</sup>Jag1<sup>Hi</sup> (Figure 1F). In relation  
140 to Dll1, we found that Hes1<sup>Hi</sup> cells typically were Nkx6-1<sup>Hi</sup>Ptf1a<sup>Lo/-</sup>Dll1<sup>Lo/-</sup> BPs and,  
141 when located in the periphery, often located next to Hes1<sup>Lo</sup>Nkx6-1<sup>Lo/-</sup>Ptf1a<sup>Hi</sup>Dll1<sup>Hi</sup> cells  
142 (Figure 1G). Analyses of double reporter mice harboring either *Jag1*<sup>J1Vmc</sup> or *Dll1*<sup>D1Vmc</sup>  
143 lines combined with a *Hes1*-EGFP reporter (Klinck et al., 2011) for EGFP and mCherry  
144 expression confirmed the progressive confinement of Hes1 to BPs and Jag1 to PACs as  
145 well as the heterogenous Dll1 expression at multiple stages, albeit the long half-life of  
146 EGFP and mCherry likely overestimated the number of co-positive cells (Figure S1D).  
147 A schematic representation of ligand and receptor expression patterns is shown in

148 Figure S1E. Overall, we observe an inverse correlation between Dll1 and Hes1  
149 expression and the data suggest that BPs ( $Jag1^{-}Dll1^{+/-}Notch1^{+}Notch2^{+}$ ) have receptors  
150 in stoichiometric surplus, favoring signal reception, while ligands are in surplus in PACs  
151 ( $Jag1^{+}Dll1^{+/-}Notch1^{+}Notch2^{-}$ ), favoring signal sending. Together, the data show that  
152 Notch receptor activation becomes suppressed in emerging  $Jag1^{+}Dll1^{+/-}$  PACs, and  
153 support the notion that these, together with  $Ngn3^{+}Dll1^{Hi}$  endocrine precursors in the  
154 central trunk epithelium, are activating Notch receptors in nascent,  $Jag1^{Lo/-}Dll1^{Lo/-}$  BPs.

155

156 **Hes1 and Dll11 proteins display ultradian oscillations.** An inverse correlation  
157 between heterogenous Dll1 and Hes1 expression is also observed in neural  
158 progenitors, where it reflects oscillating protein levels (Imayoshi et al., 2013; Shimojo  
159 et al., 2016; Shimojo et al., 2008), but it is unknown whether Notch components  
160 oscillate in the fetal pancreas. To address this question, we examined the dynamics of  
161 Hes1 and Dll1 protein expression in the developing pancreas using BAC-transgenic  
162 Luc2-Hes1 fusion protein reporter mice (Imayoshi et al., 2013) and *Dll1*-Fluc knock-in  
163 mice (Shimojo et al., 2016). E10.5 and E12.5 dorsal pancreata were explanted and  
164 cultured with luciferin, and bioluminescence images were examined. Time-lapse  
165 imaging analysis showed that Hes1 protein expression changed dynamically  
166 throughout the explant and neighboring cells were frequently observed to oscillate in  
167 anti-phase (Figure 2A, Movie S1-S3). Temporal analysis revealed well-defined  
168 oscillations in Hes1 protein levels with an average period of ~90 min that remained  
169 constant throughout a 6-day culture period (Figure 2A). Equally, time-lapse imaging  
170 analysis showed that Dll1 protein expression also changed dynamically throughout the  
171 explant (Figure 2B, Movie S4). Temporal analysis revealed that Dll1 protein levels also  
172 oscillated with an average period of ~90 min (Figure 2B). As both *Hes1* and *Dll1* are  
173 direct Hes1 target genes in pancreatic progenitors (de Lichtenberg et al., 2018a; de  
174 Lichtenberg et al., 2018b), these data indicate that Hes1 and Dll1 participate in the  
175 same oscillating gene regulatory network in the early pancreas.

176

177 **Dll1 oscillations augment and Jag1 attenuates MPC growth.** We have previously  
178 shown that global mutations in either Hes1 or Dll1 reduces MPC proliferation and the  
179 size of the pancreas anlage (Ahnfelt-Rønne et al., 2012). Given the different

180 spatiotemporal expression patterns of Dll1 and Jag1 in MPCs we first asked whether  
181 Dll1 oscillations were important for Dll1 stimulated MPC expansion. To address this  
182 question, we examined pancreatic bud size by whole-mount IF (WM-IF) in two  
183 different *Dll1* mutant mouse lines (termed *Dll1 type1* and *Dll1 type2* mutants) that  
184 display steady, intermediate level Dll1 expression and dampened Hes1 oscillations  
185 (Shimojo et al., 2016) and compared to littermate wild-type controls. We found that  
186 average dorsal pancreatic bud size was reduced by ~45% and ~25% in *Dll1*<sup>type1/type1</sup> and  
187 *Dll1*<sup>type2/type2</sup> mutants, respectively, while ventral buds were reduced by ~55% and  
188 ~65%, respectively (Figure 3A). The magnitude of this change is comparable to a ~65%  
189 reduction in dorsal and ventral bud size observed in E10.5 *Dll1*<sup>ΔFoxa2</sup> embryos (Figure  
190 3A), and in *Dll1*<sup>-/-</sup> mutants (Ahnfelt-Rønne et al., 2012). These results suggest that Dll1  
191 oscillations are important for MPC expansion by ensuring adequate Notch activation,  
192 perhaps by allowing MPCs to alternate between sending and receiving states multiple  
193 times within a single cell cycle.

194 We then asked whether bud sizes were affected in E10.5 *Jag1*<sup>ΔFoxa2</sup> embryos. Since  
195 *Foxa2* is linked to *Jag1* on mouse chromosome 2 at a distance of ~5.7 cM we first  
196 introduced a *Jag1* null allele (Xue et al., 1999) on the same chromosome as the  
197 *Foxa2*<sup>iCre</sup> allele via meiotic crossover. Animals carrying *Jag1*<sup>-</sup>; *Foxa2*<sup>iCre</sup> chromosomes  
198 were then backcrossed to homozygous *Foxa2*<sup>iCre/iCre</sup> animals to secure this  
199 chromosome from further crossover events. Timed matings of these mice with *Jag1*<sup>fl/fl</sup>;  
200 *R26*<sup>YFP/YFP</sup> animals generated *Jag1*<sup>ΔFoxa2/-</sup> embryos (referred to as *Jag1*<sup>ΔFoxa2</sup>) and  
201 *Jag1*<sup>ΔFoxa2/+</sup> heterozygote littermate controls. Remarkably, WM-IF analysis revealed  
202 the E10.5 dorsal and ventral pancreata to be increased in size in *Jag1*<sup>ΔFoxa2</sup> embryos  
203 compared to controls (Figure 3A). Together, these data suggest that Notch activation  
204 is mediated by oscillating Dll1 expression, which via induction of oscillating Hes1  
205 expression stimulates MPC expansion. Conversely, Jag1 attenuates Dll1-mediated  
206 Notch activation to limit MPC expansion, possibly by sequestering a fraction of the  
207 available Notch receptors in *cis*.

208

209 **Suppressing Notch before ~E13 shunts progenitors to a PAC fate.** Before testing the  
210 requirement for Jag1 and Dll1 in the segregation of MPCs into BP and PAC fates we



211 decided to define the temporal window through which Notch signaling affected this  
212 fate choice. To address this question, we administered tamoxifen (Tam) to pregnant  
213 dams carrying either *Hnf1b*-CreER<sup>T2</sup>; *Rosa26*<sup>LSL-dnMaml1-eGFP/+</sup> (hereafter referred to as  
214 *R26*<sup>dnMaml1</sup>) embryos or *Hnf1b*-CreER<sup>T2</sup>; *Rosa26*<sup>LSL-YFP/+</sup> (hereafter referred to as *R26*<sup>YFP</sup>)  
215 control embryos at different timepoints and harvested embryos for analysis at E15.5  
216 (Figure 4A). In agreement with a previous *Hnf1b*-CreER<sup>T2</sup> lineage-tracing analysis (Solar  
217 et al., 2009), IF examination of *R26*<sup>YFP</sup> pancreata, treated with Tam between E11.5 –  
218 E13.5, for Sox9 and Ptf1a revealed that while some *Hnf1b*-expressing cells retain their  
219 multipotency at E13 and E14, they become progressively more biased towards the BP  
220 lineage with time (Figures 4B-4D and 4N). In contrast, *R26*<sup>dnMaml1</sup> pancreata treated  
221 with Tam at E11.5 showed an ~11-fold reduction of EGFP<sup>+</sup> cells adopting a BP fate,  
222 while the fraction of EGFP<sup>+</sup> cells allocated to a PAC fate had increased almost 3-fold.  
223 The fraction of labeled cells expressing neither marker was unchanged (Figures 4E and  
224 4N). Similarly, significantly fewer EGFP<sup>+</sup> cells co-expressed Sox9 in *R26*<sup>dnMaml1</sup>  
225 pancreata injected with Tam at E12.5 or E13.5 compared to controls. However, in  
226 sharp contrast to E11.5 Tam-induced pancreata, the proportion of EGFP<sup>+</sup> cells  
227 expressing Ptf1a was unchanged following Tam treatment at E12.5 and E13.5. Instead,  
228 more EGFP<sup>+</sup> cells were Sox9<sup>-</sup>Ptf1a<sup>-</sup>, compared to YFP<sup>+</sup> cells in the controls (Figures 4F,  
229 4G, 4N). Together, these data show that suppression of Notch signal reception in MPCs  
230 and BPs before ~E13 shunts the cells to a PAC fate. However, if Notch signaling is  
231 blocked in BPs after ~E13, they adopt an alternative fate.

232

233 **Suppressing Notch after ~E13 shunts progenitors to an endocrine fate.** We next  
234 performed IF for EGFP/YFP, Sox9, Ngn3 and Chga to determine when progenitors  
235 adopted an endocrine fate upon Notch blockade. As expected, the fraction of labelled  
236 cells expressing Sox9 in E15.5 *R26*<sup>dnMaml1</sup> pancreata was significantly lower than in  
237 controls after Tam injection at E11.5 and consistent with the increase of labelled  
238 Ptf1a<sup>+</sup> cells mentioned above, significantly more labelled cells were triple-negative for  
239 Sox9, Ngn3 and Chga in dnMaml1 embryos, compared to controls (Figures 4H, 4K, 4O).  
240 Examining endocrine lineage markers, we found that the fraction of labelled cells  
241 expressing either Ngn3 or Chga, was not significantly different between dnMaml1

242 embryos and controls (Figures 4H, 4K, 4O). However, fewer labelled cells co-expressed  
243 Ngn3 in dnMaml1 embryos than in controls (Figure 4P). Conversely, when Tam was  
244 injected at E12.5 and E13.5, the fraction of labelled cells expressing endocrine markers  
245 was now markedly increased compared to controls, while the fraction of labelled cells  
246 expressing Sox9 was reduced and labelled cells triple-negative for Sox9, Ngn3 and  
247 Chga was unchanged between groups (Figures 4I, 4J, 4L, 4M). Again, fewer labelled  
248 cells co-expressed Ngn3 in dnMaml1 embryos than in controls (Figure 4P). A  
249 qualitative analysis of lineage-traced E15.5 *Sox9-CreER<sup>T2</sup>; R26<sup>dnMaml1</sup>* embryos  
250 compared to stage-matched *Sox9-CreER<sup>T2</sup>; R26<sup>YFP</sup>* embryos revealed the same shift in  
251 the fate of the labelled cells when comparing Tam injections at E11.5 to E12.5 and  
252 E13.5 (Figure S2). Taken together, these results show that the time window through  
253 which prevention of Notch activation can shunt cells to a PAC fate closes by ~E13 and  
254 confirms that prevention of Notch activation in BPs after ~E13 induces endocrine  
255 differentiation (Magenheim et al., 2011; Shih et al., 2012).

256

257 **Jag1 is required to exit multipotency.** Having established the temporal limit for BP  
258 versus PAC specification we next sought to identify the ligands responsible for this fate  
259 choice. IF analysis of E12.5 *Jag1<sup>ΔFoxa2</sup>* mutant pancreas revealed that the fraction of  
260 Ptf1a<sup>+</sup>Nkx6-1<sup>+</sup> MPCs was significantly increased at the expense of Ptf1a<sup>-</sup>Nkx6-1<sup>+</sup> BPs,  
261 while the fraction of Ptf1a<sup>+</sup>Nkx6-1<sup>-</sup> PACs was unchanged compared to controls  
262 (Figures 3B-3C). While Ptf1a is essentially confined to the peripheral-most epithelial  
263 cells in wild-type controls, Ptf1a expression was also seen in a few, more proximal cells  
264 in *Jag1<sup>ΔFoxa2/+</sup>* heterozygotes and prominently in many proximal cells in *Jag1<sup>ΔFoxa2/-</sup>*  
265 homozygote mutants (Figure 3B). We previously performed the same analysis on  
266 E12.5 *Dll1<sup>ΔFoxa2</sup>* mutant pancreas (Horn et al., 2012) so we calculated the percentage  
267 of each cell type from those data and found that while the fraction of Ptf1a<sup>-</sup>Nkx6-1<sup>+</sup>  
268 BPs was also reduced in these embryos, the fraction of Ptf1a<sup>+</sup>Nkx6-1<sup>+</sup> MPCs was not  
269 increased. Instead, the fraction of Ptf1a<sup>+</sup>Nkx6-1<sup>-</sup> PACs was increased (Fig. 3C). Thus,  
270 proper segregation of MPCs into PAC and BP domains at E12.5 requires Jag1, while  
271 Dll1 is required for biasing MPCs towards a BP fate.

272 Analysis of later stages revealed that most Ptf1a<sup>+</sup> cells remained co-positive for Nkx6-  
273 1 and Sox9 at E13.5, thus maintaining an MPC marker profile. Not until E14.5 did we

274 observe a resolution into distinct Ptf1a<sup>+</sup>Nkx6-1<sup>-</sup> PACs and Ptf1a<sup>-</sup>Nkx6-1<sup>+</sup> BPs in the  
275 *Jag1*<sup>ΔF<sub>oxa2</sub></sup> pancreas (Figure S3). However, while BPs normally extend all the way into  
276 the forming acini at this stage, the *Jag1*<sup>ΔF<sub>oxa2</sub></sup> pancreas was nearly devoid of such cells  
277 in the periphery (Figure S3). To begin to understand the mechanism causing MPCs to  
278 maintain their multipotent state we assessed how loss of Jag1 impacts Notch activity  
279 in *Jag1*<sup>ΔF<sub>oxa2</sub></sup> pancreata by IF analysis of Hes1 expression. We found that Hes1  
280 expression, and by inference active Notch signaling, was upregulated in the E12.5  
281 *Jag1*<sup>ΔF<sub>oxa2</sub></sup> pancreas compared to heterozygote littermates (Figure 3D-3E). This was  
282 especially notable in the distal-most cells, in which average Hes1 levels were increased  
283 ~2-fold (Figure 3E). This finding suggests that Jag1 is required cell-autonomously to  
284 inhibit Notch activation in emerging PACs, and thus act as a symmetry breaker that  
285 triggers exit from the multipotent state.

286

287 **The combined activities of *Jag1* and *Dll1* specify the entire BP population.** Since  
288 E15.5 *Mib1*<sup>ΔF<sub>oxa2</sub></sup> mutants are comprised exclusively of PACs cells (Horn et al., 2012)  
289 we next examined the individual and combined requirement of Jag1 and Dll1 for BP  
290 versus PAC fate at this stage. To address this question, we generated stage-matched  
291 *Dll1*<sup>ΔF<sub>oxa2</sub></sup> and *Jag1*<sup>ΔF<sub>oxa2</sub></sup> mutants, compound *Jag1*; *Dll1*<sup>ΔF<sub>oxa2</sub></sup> mutants, and control mice  
292 without ligand deletions (*Foxa2*<sup>T2AiCre</sup>; *R26*<sup>YFP</sup>). Analysis of all four genotypes at E15.5  
293 revealed no change in the numbers of PACs or BPs per unit area between single  
294 *Dll1*<sup>ΔF<sub>oxa2</sub></sup> mutant and control pancreata. However, the *Dll1*<sup>ΔF<sub>oxa2</sub></sup> mutant pancreata  
295 were clearly hypomorphic. In contrast, BPs were severely depleted in *Jag1*<sup>ΔF<sub>oxa2</sub></sup>  
296 mutants with a corresponding expansion of PACs, and in compound *Jag1*; *Dll1*<sup>ΔF<sub>oxa2</sub></sup>  
297 mutants this shift in fate was essentially all-encompassing (Figures 5A-5E). Notably,  
298 *Jag1*<sup>ΔF<sub>oxa2</sub>/+</sup> heterozygotes showed an intermediate phenotype (Figures S4A-S4D). The  
299 few remaining BPs found in *Jag1*<sup>ΔF<sub>oxa2</sub></sup> mutants were confined to the central core of  
300 the organ (Figure 5A-5B), which was also evident when plotting the fraction of Nkx6-  
301 1<sup>+</sup> and Ptf1a<sup>+</sup> cells in the z-dimension (Figure 5C). IF staining for insulin revealed a ~50%  
302 decrease in the number of insulin<sup>+</sup> β-cells in both *Dll1*<sup>ΔF<sub>oxa2</sub></sup> and *Jag1*<sup>ΔF<sub>oxa2</sub></sup> pancreata  
303 compared to controls, while compound *Jag1*; *Dll1*<sup>ΔF<sub>oxa2</sub></sup> mutants exhibited a near  
304 complete loss of β-cells (Figure 5D-5E). Together, these data show that Jag1 is required

305 for development of all but the central-most BPs and that the combined activities of  
306 Jag1 and Dll1 specify the entire BP lineage and suggest that MPCs normally fated to  
307 become BPs adopt a PAC fate in their absence.

308

309 **Impeding ligand trans-activation in late development only affects CACs.** The strong  
310 phenotype we observe in *Jag1; Dll1<sup>ΔFoxa2</sup>* mutant embryos contrasts with the rather  
311 modest phenotype seen in *Jag1; Dll1<sup>ΔPtf1a</sup>* mutant embryos, which only lack CACs  
312 (Nakano et al., 2015). This suggests that the timing of Cre-mediated recombination,  
313 which is mosaic and occurs considerably later with *Ptf1a<sup>Cre</sup>* compared with *Foxa2<sup>iCre</sup>*  
314 <sup>44,48</sup>, is critical for deciding the outcome. Considering that Mib1 is required for all Notch  
315 ligand trans-activation (Itoh et al., 2003; Koo et al., 2005; Koo et al., 2007) and that its  
316 elimination in *Mib1<sup>ΔFoxa2</sup>* pancreata phenocopies the cell fate changes in *Jag1;*  
317 *Dll1<sup>ΔFoxa2</sup>* embryos seen here (Horn et al., 2012), we therefore asked whether  
318 *Mib1<sup>ΔPtf1a</sup>* pancreata would phenocopy *Jag1; Dll1<sup>ΔPtf1a</sup>* pancreata. *Mib1*-depleted cells  
319 and their progeny were identified by *R26<sup>YFP</sup>* recombination. Examination of *Mib1<sup>ΔPtf1a</sup>*  
320 pancreata prior to E13.5 failed to reveal any obvious defects. In contrast, analysis at  
321 E15.5 revealed the ductal tree to be truncated distally. The distal-most, Sox9<sup>+</sup> cells  
322 (prospective CACs), which normally protrude into the nascent Ptf1a<sup>+</sup> acini are  
323 specifically depleted in *Mib1<sup>ΔPtf1a</sup>* embryos (Figure S5). Notably, this phenotype closely  
324 resembles the reported loss of CACs following *Ptf1a<sup>Cre</sup>*-driven compound deletion of  
325 *Dll1* and *Jag1* (Nakano et al., 2015). Taken together, these results suggest that the  
326 trans-activation of Notch receptors by Jag1 and Dll1 expressed on PACs and emerging  
327 acinar cells is required to specify and/or maintain adjacent CAC precursors.

328

329 **Coupling of Hes1 oscillation parameters to cell fate.** Similar to *Jag1; Dll1<sup>ΔFoxa2</sup>* mutants,  
330 *Hes1<sup>ΔFoxa2</sup>* embryos also show severely reduced numbers of BPs and a corresponding  
331 increase in PACs (Horn et al., 2012). We therefore asked whether perturbing the  
332 period or amplitude of Hes1 oscillations would similarly affect cell fate. To address this  
333 question, we exploited the ability of NICD levels to modulate oscillation parameters  
334 (Wiedermann et al., 2015). We explanted E10.5 dorsal buds from *Hes1*-Luc2 embryos  
335 and perturbed NICD levels with small molecule inhibitors. We monitored the period  
336 and amplitude of Hes1 oscillation by bioluminescence imaging and conducted end-

337 point IF analysis of cell fate allocation. Western blot analysis showed that treatment  
338 with a low dose of the  $\gamma$ -secretase inhibitor DAPT reduced average N1ICD levels by  
339 ~50% compared to vehicle controls (Figure 6A) and bioluminescence imaging revealed  
340 a ~70% decrease in the amplitude of Hes1 oscillations, while the period was  
341 unaffected (Figure 6B). This was associated with an increase of Ptf1a<sup>+</sup> PACs and  
342 Ptf1a<sup>+</sup>Sox9<sup>+</sup> MPCs at the expense of Sox9<sup>+</sup> BPs at the end of the 4-day culture period  
343 (Figure 6C-6D). In contrast, exposure to MLN4924, a Nedd8 activating enzyme  
344 inhibitor, increased N1ICD levels by ~60% compared to vehicle controls (Figure 6A)  
345 and prolonged the mean oscillation period from ~90 to ~120 minutes while only  
346 marginally affecting the amplitude (Figure 6B). IF analysis showed that Ptf1a<sup>+</sup> cells  
347 (PACs and MPCs) were strongly reduced by MLN4924 treatment and the explants  
348 were composed almost entirely of Sox9<sup>+</sup> cells (BPs and/or duct cells) (Figure 6C-6D).  
349 Together these data suggest that the both the amplitude and period of Hes1  
350 oscillations are important for MPC fate choice.

351

352 **Early *Jag1* <sup>$\Delta$ Foxa2</sup> mutants have normal plexus formation and organ architecture.** We  
353 next analyzed how the BP-to-PAC fate switch affects ductal morphogenesis and overall  
354 organ development in *Jag1* <sup>$\Delta$ Foxa2</sup> mutants. In spite of the delayed PD patterning, we  
355 found that formation of the epithelial plexus occurred normally and overall organ size  
356 and morphology was comparable between *Jag1* <sup>$\Delta$ Foxa2</sup> mutants and heterozygote  
357 littermate controls (Figure 7A). Remarkably, even at E15.5 the overall organ  
358 architecture is essentially unaffected. The dorsal pancreas had a well-formed, anvil-  
359 shaped head and the body gradually tapered into the narrow connection with a  
360 normal-sized ventral pancreas located in the duodenal loop (Figure 7B). In contrast,  
361 the *Dll1* <sup>$\Delta$ Foxa2</sup> dorsal pancreas was hypoplastic with the head being malformed and the  
362 body of the pancreas being greatly truncated (Figure 7B). However, closer inspection  
363 of *Jag1* <sup>$\Delta$ Foxa2</sup> embryos revealed that although the ductal plexus appeared to have  
364 remodeled into a hierarchical tree-like structure, the smooth walls of the intercalated  
365 ducts seen in controls and *Dll1* <sup>$\Delta$ Foxa2</sup> mutants, showed a more serrated appearance in  
366 *Jag1* <sup>$\Delta$ Foxa2</sup> mutants (Figure 7B). Nevertheless, acinar structure appears normal with  
367 apical localization of Muc1, ZO-1 and PKC $\zeta$ , indicating that acinar cytoarchitecture is

368 maintained in the E15.5 *Jag1*<sup>ΔF<sub>oxa2</sub></sup> pancreas (Figure 7H-7I). In the domain usually  
369 occupied by Sox9<sup>+</sup> prospective ducts, we were able to identify elongated tubular  
370 structures expressing Ptf1a instead of Sox9 (Figure S4E). Similar to normal PACs these  
371 mis-specified PACs also expressed Bhlha15/Mist1 (Figure S4F). Taken together, these  
372 findings suggest that the overall organ architecture and remodeling of the ductal  
373 plexus is regulated independently from the differentiation programs that allocate  
374 MPCs to endocrine, duct and acinar lineages. In contrast, finer morphological features  
375 of the ductal tree are clearly perturbed by the BP-to-PAC fate switch.

376

377 **Late *Jag1*<sup>ΔF<sub>oxa2</sub></sup> embryos show signs of acute pancreatitis and ADM.** E18.5 *Jag1*<sup>ΔF<sub>oxa2</sub></sup>  
378 pancreata remained equivalent to controls in size and overall organ morphology. The  
379 dorsal and ventral pancreas appeared fused normally, the gastric lobe was present,  
380 and the normal “anvil” shape of the dorsal pancreas (Villasenor et al., 2010) was  
381 evident (Figure 7C). However, closer inspection revealed that the larger ducts were  
382 not formed properly. The main duct was disrupted, interlobular as well as larger  
383 intralobular ducts were largely absent and many of the terminal ducts appeared  
384 serrated, occasionally connected by ducts of relatively normal morphology despite  
385 being composed of Ptf1a<sup>+</sup> cells (Figure 7D). As expected, we saw a prominent loss of  
386 endocrine cells in E18.5 *Jag1*<sup>ΔF<sub>oxa2</sub></sup> pancreata, with scattered α-cells and a central  
387 cluster of β-cells. The late-arising, somatostatin<sup>+</sup> δ-cells were nearly absent, even in  
388 the central cluster (Figure 7E). Examination of Muc1 and Krt19 expression and DBA  
389 lectin binding revealed an obvious paucity of the ductal tree and throughout the  
390 epithelium we observed numerous “ring-like” structures with perturbed apicobasal  
391 polarity and co-expression of amylase, Cpa1 and Krt19 (Figure 7F-7I), reminiscent of  
392 the acinar-to-ductal metaplasia (ADM) associated with Cerulein-induced acute  
393 pancreatitis (Nishikawa et al., 2019).

394

## 395 Discussion

396 Regulation of MPC proliferation and fate choice by Notch has been comprehensively  
397 documented by previous work (Afelik et al., 2012; Ahnfelt-Rønne et al., 2012;  
398 Apelqvist et al., 1999; Fujikura et al., 2006; Fujikura et al., 2007; Hald et al., 2003;  
399 Jensen et al., 2000a; Jensen et al., 2000b; Murtaugh et al., 2003; Schaffer et al., 2010;

400 Shih et al., 2012). In this study we show that the Notch pathway components Dll1 and  
401 Hes1 display ultradian oscillations in the developing mouse pancreas and that Jag1,  
402 which is uniformly expressed in MPCs, dampens Dll1-mediated Notch activation to  
403 restrain MPC growth, secure timely exit from the multipotent state, and coordinate  
404 MPC fate choice (Figure S6).

405 We found the period of pancreatic Dll1 and Hes1 oscillations to be in the range of 1-2  
406 hours with an average of ~90 minutes. This is noticeably shorter than the period  
407 observed in neural progenitors, which is in the range of 2-3 hours with an average of  
408 ~150 minutes (Imayoshi et al., 2013; Shimojo et al., 2016). At first glance this may  
409 appear surprising given that the regulatory network between and within cells has a  
410 similar architecture for neural and pancreatic progenitors (this work and (Kageyama  
411 et al., 2008; Tiedemann et al., 2017)). Moreover, the oscillations in neighboring  
412 pancreatic and neural progenitors are typically not in phase, while groups of oscillating  
413 cells in the pre-somitic mesoderm *are* in phase. Indeed, we often observed Hes1  
414 oscillations in neighboring pancreatic cells to be in anti-phase, as is also observed in  
415 neural progenitors (Imayoshi et al., 2013). So how can the different periods be  
416 explained? The oscillatory period in pre-somitic mesoderm is sensitive to Notch  
417 activity and modeling suggests that this may be a general property of Notch  
418 oscillations (Kim et al., 2011; Wiedermann et al., 2015). We therefore speculate that  
419 the high expression levels of Notch pathway components in neural progenitors  
420 compared to MPCs may cause the former to attain a longer period. This notion is  
421 supported by our observation of an extended period in pancreatic progenitors treated  
422 with MLN4924 but raises the question of why the period is not shortened by DAPT  
423 treatment. However, a minimal period is imposed on the system, partly by the sum of  
424 the transcriptional and translational delays in the delayed negative feedback  
425 mechanism of Hes1 and partly by the parameters governing the dynamics of  
426 Dll1/Notch-mediated intercellular signaling (Lewis, 2003), and it is possible that a  
427 minimal period is reached in the pancreas.

428 We have previously shown that E10.5 *Dll1*<sup>-/-</sup> pancreata are hypoplastic due to reduced  
429 proliferation (Ahnfelt-Rønne et al., 2012) and now we show that E10.5 *Dll1*<sup>ΔFoxa2</sup>  
430 mutants and *Dll1* Type 1 and Type 2 oscillation mutants also present with pancreatic  
431 hypoplasia. Both Type 1 and Type 2 mutants encode the wildtype protein, but due to

432 accelerated or delayed protein synthesis, respectively, a steady intermediate level of  
433 Dll1 expression is achieved as oscillations of both Dll1 and Hes1 are dampened  
434 (Shimojo and Kageyama, 2016). The hypoplasia seen in these mutants suggests that  
435 oscillatory expression of Dll1 and/or Hes1 is important for stimulating MPC growth.  
436 This can be explained if ultradian Dll1 oscillations enables a temporal symmetry where  
437 MPCs alternate between sending and receiving input via Notch. Without oscillations  
438 it would prove difficult for the cells to reach a ligand<sup>Lo</sup>, receiving state as they would  
439 be subject to *cis*-inhibition and fail to receive input via Notch receptors that ultimately  
440 couples to the mitotic machinery (Figure S6A).

441 Notably, we found that E10.5 Jag1-deficient pancreata were hyperplastic, showing  
442 that Jag1 limits MPC growth. Together, these results suggest that Jag1 antagonizes  
443 Dll1 function at this stage, possibly by a *cis*-inhibitory interaction that sequesters a  
444 fraction of the available Notch receptors (Figure S6A). It is possible that Jag1-mediated  
445 dampening of Notch activation is part of the mechanism that sets the oscillatory  
446 frequency of Hes1 and Dll1 expression.

447

448 In pancreata undergoing PD patterning, we found that emerging PACs (Ptf1a<sup>+</sup>)  
449 expressed high levels of ligands and little to no Hes1, indicating a state of low Notch  
450 activity. Conversely, adjacent MPCs (Ptf1a<sup>+</sup>Nkx6-1<sup>+</sup>) or BPs (Nkx6-1<sup>+</sup>) were generally  
451 expressing no or low levels of ligand and high levels of Hes1, indicating Notch  
452 activation. This suggests that mutually inactivating *cis*-interactions between ligands  
453 and receptors (Sprinzak et al., 2010) are crucial for exiting the multipotent stage and  
454 for the cells to adopt either a PAC or BP fate. Such a notion is supported by the  
455 downregulation of Hes1 and absence of Notch2 expression in PACs and thus overall  
456 lower levels of Notch receptor expression than seen in emerging Notch1<sup>+</sup>Notch2<sup>+</sup> BPs.  
457 Conversely, Notch1/2 co-expression, and the absence of Jag1 expression in nascent  
458 BPs, would render these more sensitive to signal reception and less prone to signal  
459 emission due to *cis* interactions (Figure S6B).

460 To test these ideas and to investigate the role of individual ligands in PD patterning  
461 we performed single and double Dll1/Jag1 loss-of-function experiments. Our marker  
462 analyses showed that most epithelial cells in the E12.5 Jag1<sup>ΔFoxa2</sup> embryos maintained  
463 a Ptf1a<sup>+</sup>Nkx6-1<sup>+</sup>Sox9<sup>+</sup> marker profile suggesting that they failed to exit the MPC stage.



464 This correlated with increased Hes1 expression, suggesting that Notch activity is  
465 increased and that Jag1 normally acts cell-autonomously to inhibit Notch activation in  
466 emerging PACs. We suggest that upregulation of Jag1 *cis*-inhibits Notch receptors and  
467 thus acts as a symmetry breaker that terminates oscillatory Hes1 expression in  
468 nascent PACs (Figure S6B). Loss of Notch activity may additionally downregulate Nkx6-  
469 1 (Afelik et al., 2012) and/or liberate Rbpj from N1ICD, which would then be free to  
470 complex with Ptf1a (Cras-Meneur et al., 2009). Both of these mechanisms would favor  
471 a PAC fate (Cras-Meneur et al., 2009; Schaffer et al., 2010). Concurrently, free ligand  
472 molecules would be able to convey *trans*-activation of receptors in neighboring cells  
473 if these are in a responsive, ligand<sup>Lo</sup>/receptor<sup>Hi</sup> state, and instruct these to adopt a BP  
474 fate (Figure S6C).

475 In spite of increased Notch activity at early stages, *Jag1*<sup>ΔFoxa2</sup> MPCs eventually adopt a  
476 PAC fate, which depends on the cells attaining a state of low Notch activation (Afelik  
477 et al., 2012; Horn et al., 2012; Schaffer et al., 2010). However, it remains to be  
478 determined what triggers a reduction in Notch activation, but it is noteworthy that the  
479 timing coincides with the onset of *Lfng* (*Lunatic fringe*) expression at E14.5 in PACs  
480 (Svensson et al., 2009). Lunatic fringe has been shown to inhibit Notch activity in  
481 presomitic mesoderm (Dale et al., 2003) and could potentially strengthen *cis*-  
482 inhibitory activity of Dll1 (LeBon et al., 2014) in E14.5 *Jag1*<sup>ΔFoxa2</sup> progenitors. This  
483 would attenuate expression of the BP-promoting Notch target genes Nkx6-1 (Afelik et  
484 al., 2012) and Sox9 (Shih et al., 2012) in Dll1<sup>Hi</sup> cells allowing these to exit from the MPC  
485 state and ultimately adopt a PAC fate. Testing this hypothesis and identifying the  
486 precise role of different Notch receptors awaits future experiments.

487 The strong effect on PD patterning we observe is surprising since previous analyses of  
488 pancreas-specific Jag1 or Jag1/Dll1 deletions did not uncover a prominent expansion  
489 of the PAC domain at the expense of BPs (Golson et al., 2009a; Golson et al., 2009b;  
490 Nakano et al., 2015) . We suspect that this can be attributed to the different timing of  
491 efficient, non-mosaic recombination between different Cre lines. Conditional Jag1  
492 deletion with *Pdx1*-Cre or *Foxa3*-Cre driver lines occurs much later than with our  
493 targeted *Foxa2*<sup>Cre</sup> driver, which recombined with >99% efficacy prior to pancreas  
494 specification (Horn et al., 2012). More recently, compound *Dll1*; *Jag1*<sup>ΔPtf1a</sup> mutants  
495 were found to have a loss of CACs, the terminal-most cell type in the ductal tree, while

496 single mutant littermates did not show any phenotype (Nakano et al., 2015). As our  
497 *Mib1*<sup>ΔPtf1a</sup> mutants phenocopy the loss of CACs reported in *Dll1*; *Jag1*<sup>ΔPtf1a</sup> mutants,  
498 this suggests that the *Ptf1a*<sup>Cre</sup>-driver only becomes non-mosaic in PACs and their  
499 progeny and that CACs are specified by PACs late in pancreatic development.

500 In spite of the prolonged MPC state, the ductal plexus forms normally. However, at  
501 later stages the consequence of the BP-to-PAC switch becomes evident as normal  
502 remodeling of the ductal plexus into a well-structured ductal tree is disrupted. The  
503 tubular network comprising the intercalated ducts seems to form but the normal  
504 smooth morphology of the ductal lumen is perturbed by E15.5. We also noted a  
505 complete absence of larger intralobular ducts and interlobular ducts at E18.5 and  
506 ductal structures in the area of the main duct appear interrupted as also previously  
507 noted in *Jag1*<sup>ΔPdx1</sup> animals (Golson et al., 2009b). These perturbations are not  
508 surprising given that acinar cells have not evolved to form cuboidal or columnar  
509 epithelia, but rather to adopt a pyramidal shape fitting for cells forming an acinus.  
510 However, in spite of these disturbances the overall organ morphology is surprisingly  
511 well preserved. We conclude that the regulatory principles governing the overall  
512 shape of the pancreas are highly resilient to cell fate changes, at least as long as these  
513 occur in the internal part of the organ.

514

515 **Acknowledgements.** We thank Ole D. Madsen and Jane E. Johnson for antibodies,  
516 Young-Yun Kong, Jorge Ferrer, Heiko Lickert, and Chris V. E. Wright for mouse lines,  
517 and Thi Nguyen for technical assistance. P.S. received grants from the Novo Nordisk  
518 Foundation (NNF16076 and NNF10717). The Novo Nordisk Foundation Center for  
519 Stem Cell Biology is supported by a Novo Nordisk Foundation grant number  
520 NNF17CC0027852.

521

522 **Author Contributions.** P.A.S., C.A.C and A.I.R.E-M designed, carried out experiments  
523 and wrote the manuscript. M.C.J. performed all staining, imaging and quantitative  
524 analysis of whole-mount specimens. K.H.L. contributed to phenotype analysis. H.S., I.I.  
525 and R.Ka. contributed to bioluminescence imaging and generated the *Jag1*<sup>J1V<sup>mC</sup></sup> and  
526 *Dll1*<sup>D1V<sup>mC</sup></sup> mouse lines. R.Ko. generated the N1IP::Cre<sup>HI</sup>; *Rosa26*<sup>LSL-Ai3</sup> embryos. P.S.

527 conceived the study, designed and interpreted experiments and wrote the manuscript.

528 All authors revised and approved the manuscript.

529

530 **Declaration of Interests.** The authors declare no competing or financial interests.

531

### 532 **Figure legends**

533 **Figure 1.** Differential expression of Notch components in MPCs and their progeny.

534 (A) Sections of E10.5, E12.5 and E15.5 *Jag1*<sup>J1V<sup>mC</sup></sup> and *Dll1*<sup>D1V<sup>mC</sup></sup> dorsal pancreata stained  
535 for Venus, Pdx1 and Sox9 as indicated. Arrowheads in E12.5 panel indicate emerging  
536 PACs. Arrows in E15.5 panels indicate endocrine precursors and arrowheads indicate  
537 forming acini. v: vessel. Lower panels show schematic representations of the *Jag1*<sup>J1V<sup>mC</sup></sup>  
538 and *Dll1*<sup>D1V<sup>mC</sup></sup> fusion protein reporters.

539 (B) Sections of E10.5 *Jag1*<sup>J1V<sup>mC</sup></sup> and *Dll1*<sup>D1V<sup>mC</sup></sup> dorsal buds stained for Venus, Sox9 and  
540 Dll1 or Jag1 as indicated. Arrows indicate Dll1<sup>+</sup>Jag1<sup>-</sup> cells and arrowheads indicate  
541 Sox9<sup>+</sup> MPCs co-expressing Jag1 and Dll1.

542 (C) Section of E12.5 dorsal pancreas stained for Ptf1a, Nkx6-1, Dll1 and Jag1 as  
543 indicated. Arrows indicate Nkx6-1<sup>+</sup> BPs expressing Dll1 but not Jag1 and arrowheads  
544 indicate Ptf1a<sup>+</sup> PACs co-expressing Jag1 and Dll1.

545 (D) Serial sections of E12.5 dorsal pancreas stained for Ptf1a, Nkx6-1, and Notch1 or  
546 Notch2 as indicated. Arrows and arrowheads in Notch1 panels indicate Notch1<sup>+</sup>Nkx6-  
547 1<sup>+</sup> and Notch1<sup>+</sup>Ptf1a<sup>+</sup> cells, respectively. Arrows and arrowheads in Notch2 panels  
548 indicate Notch2<sup>-</sup>Ptf1a<sup>+</sup> and Notch2<sup>+</sup>Nkx6-1<sup>+</sup> cells, respectively.

549 (E) Upper panel shows a schematic of the lineage-tracing strategy using N1IP::Cre to  
550 label cells with a history of Notch1 activation. Lower panels show sections of E10.5  
551 and E12.5 dorsal pancreas from an N1IP::Cre; Rosa26LSL-Ai3 embryo stained for YFP,  
552 Ptf1a and Sox9 as indicated. Insets show individual channels for clarity. Arrow: YFP-  
553 labeled, Ptf1a<sup>+</sup> PAC. Arrowheads: YFP-labeled, Sox9<sup>+</sup> BPs. Asterisks: YFP-labeled  
554 endothelial cells. The bar graph shows quantification of YFP-labeled versus unlabeled  
555 epithelial cells expressing Sox9, Ptf1a, or both. Mean ± S.D., N = 3 embryos.

556 (F) Section of E12.5 dorsal pancreas stained for Ptf1a, Nkx6-1, Hes1 and Jag1 as  
557 indicated. Arrows: Ptf1a<sup>+</sup>Jag1<sup>+</sup>Nkx6-1<sup>Lo/-</sup> cells. Arrowheads: Nkx6-1<sup>+</sup> cells; either Hes1<sup>+</sup>  
558 (white arrowheads) or Hes1<sup>-</sup> (yellow arrowheads).

559 (G) Section of E12.5 dorsal pancreas stained for Ptf1a, Nkx6-1, Hes1 and Dll1 as  
560 indicated. Arrows: Nkx6-1<sup>Hi</sup>Hes1<sup>Hi</sup> cells in distal epithelium adjacent to Ptf1a<sup>+</sup>Dll1<sup>Hi</sup>  
561 cells (arrowheads). Scale bars are 20  $\mu$ m in all panels. See also Figures S1 and S7.

562

563 **Figure 2.** Hes1 and Dll1 protein levels display ultradian oscillations.

564 (A) Bioluminescence images and quantification of Luc2-Hes1 reporter expression in  
565 E10.5 pancreatic explants cultured for 1, 4 or 6 days prior to time-lapse imaging.

566 (B) Bioluminescence images and quantification of Dll1-Fluc reporter expression in  
567 E12.5 pancreatic explants cultured for 4 hours prior to time-lapse imaging.

568 (A, B) Grayscale and false color montages are shown for the same cell and each frame  
569 is 10 minutes (10'). Representative tracks from two separate cells are shown for each  
570 condition and the scatter plots shows the distribution and average of the oscillation  
571 periods (Mean  $\pm$  S.D., N > 50 cells for each Hes1-Luc2 time point and N = 18 for Dll1-  
572 Fluc).

573

574 **Figure 3.** Dll1 and Jag1 differentially affects MPC expansion and differentiation.

575 (A) 3D maximum intensity projections and bud volume quantifications of E10.5  
576 *Dll1*<sup>T1/T1</sup>, *Dll1*<sup>T2/T2</sup>, *Dll1* <sup>$\Delta$ Foxa2</sup>, *Jag1* <sup>$\Delta$ Foxa2/-</sup> mutants and their wildtype or heterozygote  
577 littermate controls stained by whole-mount IF for Pdx1, Ngn3, and Gcg as indicated.  
578 dp: dorsal pancreas; vp: ventral pancreas. Scale bar is 50  $\mu$ m.

579 (B) Sections of E12.5 wildtype *R26*<sup>Yfp/Yfp</sup>, *Jag1* <sup>$\Delta$ Foxa2/+</sup> and *Jag1* <sup>$\Delta$ Foxa2/-</sup> mutants stained  
580 by IF for Ptf1a and Nkx6-1 as indicated. Insets shows higher magnification views of the  
581 boxed areas in the main panels. Scale bars, 25  $\mu$ m (main panels) and 10  $\mu$ m (insets).

582 (C) Quantification of Ptf1a<sup>+</sup>, Nkx6-1<sup>+</sup> and Ptf1a<sup>+</sup>Nkx6-1<sup>+</sup> co-expressing cells in E12.5  
583 wildtype *R26*<sup>Yfp/Yfp</sup>, *Jag1* <sup>$\Delta$ Foxa2/+</sup> and *Jag1* <sup>$\Delta$ Foxa2/-</sup> mutants as well as in *Dll1*<sup>f/f</sup> wildtypes  
584 and *Dll1* <sup>$\Delta$ Foxa2</sup> mutants. Mean  $\pm$  S.D., N = 3-5 as indicated by individual data points.

585 (D) Sections of E12.5 *R26*<sup>Yfp/Yfp</sup>, *Jag1* <sup>$\Delta$ Foxa2/+</sup> and *Jag1* <sup>$\Delta$ Foxa2/-</sup> pancreata stained for Ptf1a  
586 and Hes1 as indicated. Scale bars are 25  $\mu$ m (main panels) and 10  $\mu$ m (insets).

587 (E) Quantification of Hes1 fluorescence intensity in distal Ptf1a<sup>+</sup> cells in *Jag1* <sup>$\Delta$ Foxa2/-</sup>  
588 mutants and *Jag1* <sup>$\Delta$ Foxa2/+</sup> littermate controls. Scatter plots show intensity values for  
589 individual cells in three mutant-control pairs in three, separate IF experiments, mean

590 ± S.D.,  $N \geq 192$  cells/embryo. Changes in mean Hes1 levels for each pair of embryos  
591 are shown in the right-hand panel, color-coded for embryo ID (a.u., arbitrary units).  
592

593 **Figure 4.** Stage-dependent allocation of progenitor fate by Notch suppression.

594 (A) Overview of strategy applied to identify fates of progeny from pancreatic  
595 progenitors. Approximate temporal windows of Tamoxifen (Tam) activity resulting  
596 from single intraperitoneal injections at E11.5, E12.5 or E13.5 and cell fate-specific  
597 markers are indicated. PAC: pre-acinar cell; BP: bipotent progenitor; EP: endocrine  
598 precursor; EC: endocrine cell.

599 (B-M) Sections of E15.5 *Hnf1b-CreER<sup>T2</sup>; R26<sup>YFP</sup>* control (B-D, H-J) or *Hnf1b-CreER<sup>T2</sup>;*  
600 *R26<sup>dnMaml1</sup>* Notch-blocked (E-G, K-M) pancreata stained for EYFP/EGFP and Sox9  
601 combined with either Ptf1a (B-G) or Ngn3 and Chga (H-M), as indicated. bp: bi-potent  
602 progenitor domain; ac: emerging acini; ec: endocrine cells. Scale bar 50  $\mu\text{m}$ . Arrows in  
603 (B-D, H-J) lineage-labeled Sox9<sup>+</sup> BPs. Arrowheads in (B, E): lineage-labeled Ptf1a<sup>+</sup> PACs.  
604 Arrowheads in (F, G): Ptf1a/Sox9 double negative cells. Arrowheads in (I-J, L-M) Chga<sup>+</sup>  
605 endocrine cells. Red arrowhead in (J): Ngn3<sup>+</sup> endocrine precursor. Arrowheads in (K):  
606 lineage-labeled Ngn3/Chga/Sox9 triple negative cells. Scale bar is 50  $\mu\text{m}$ .

607 (N-O) Quantification of *R26<sup>YFP</sup>*- (EYFP) versus *R26<sup>dnMaml1</sup>* (EGFP)-labeled cell  
608 distribution at E15.5 following Tam administration at E11.5, E12.5 or E13.5 as  
609 indicated. Pie charts show fractions of EYFP/EGFP-labeled cells expressing Ptf1a, Sox9  
610 or neither marker (D-neg) or Sox9, endocrine markers (Endo, Ngn3+Chga) or none of  
611 the three (T-neg). (P) Pie chart showing the proportions of labeled cells in the  
612 endocrine lineage expressing either Ngn3 or Chga. P-values for significant changes in  
613 allocation to distinct cell fates between *R26<sup>dnMaml1</sup>* and controls are indicated by font  
614 color.  $N = 3$  embryos per genotype for each Tam injection time-point. See also Figure  
615 S2.

616

617 **Figure 5.** Progenitors adopt a PAC fate in *Jag1-Dll1* double mutant mice.

618 (A) IF for Ptf1a and Nkx6-1 as indicated on sections of E15.5 *R26<sup>Yfp/+</sup>, Dll1<sup>ΔFoxa2</sup>,*  
619 *Jag1<sup>ΔFoxa2</sup>,* and *Jag1; Dll1<sup>ΔFoxa2</sup>* dorsal pancreata. Di: distal; Pr: proximal. Scale bars are  
620 100  $\mu\text{m}$  (main panels) and 25  $\mu\text{m}$  (insets).

621 (B) Quantitative analyses of the ratio of Ptf1a<sup>+</sup>, Nkx6-1<sup>+</sup> or Ptf1a<sup>+</sup>Nkx6-1<sup>+</sup> (Co<sup>+</sup>) cells in  
622 E15.5 mutant and control pancreata.

623 (C) Distribution of Ptf1a<sup>+</sup>, Nkx6-1<sup>+</sup> or Ptf1a<sup>+</sup>Nkx6-1<sup>+</sup> cells on every 10<sup>th</sup> section in the z-  
624 dimension is shown for a representative embryo from each genotype.

625 (D) IF for Sox9, Ngn3 and insulin as indicated on sections of E15.5 *R26<sup>Yfp/+</sup>*, *Dll1<sup>ΔFoxa2</sup>*,  
626 *Jag1<sup>ΔFoxa2</sup>*, and *Jag1; Dll1<sup>ΔFoxa2</sup>* dorsal pancreata. Di: distal; Pr: proximal. Scale bars are  
627 100 μm (main panels) and 25 μm (insets).

628 (E) Quantitative analysis of Sox9<sup>+</sup> and insulin<sup>+</sup> β-cells in E15.5 mutant and control  
629 pancreata. Graphs show mean ± S.D., N = 3 except for *Jag1; Dll1<sup>ΔFoxa2</sup>* where N = 2. See  
630 also Figures S3, S4 and S5.

631

632 **Figure 6.** Modulation of NICD levels affect Hes1 oscillation parameters and cell fate.

633 (A) Western blots showing reduced or elevated N1ICD levels in response to DAPT (2.5  
634 μM) or MLN4924 (5 μM) treatment, respectively. Bar graph shows quantification of  
635 band intensities from individual experiments (mean ± S.D., N = 4).

636 (B) Distributions and averages of the of amplitudes and periods for Hes1 oscillations  
637 in E10.5 pancreas explants treated with DAPT or MLN4924. (Mean ± S.D., N > 50 cells  
638 for each condition.

639 (C) 3D maximum intensity projections of E10.5 pancreas explants cultured for 5 days  
640 in DAPT or MLN4924 and stained by whole-mount IF for Sox9 and Ptf1a. Scale bar is  
641 100 μm.

642 (D) Quantitative analyses of the ratio of Ptf1a<sup>+</sup>, Sox9<sup>+</sup> or Ptf1a<sup>+</sup>Sox9<sup>+</sup> cells from E10.5  
643 pancreas explants cultured as in (C). Median and interquartile ranges as well as  
644 minimum and maximum values are indicated, N = 13 for DMSO- and MLN4924-treated  
645 samples and N = 7 for DAPT treated samples. See also Figure S6.

646

647 **Figure 7.** Ductal remodeling is defective in *Jag1<sup>ΔFoxa2</sup>* mutants.

648 (A) 3D maximum intensity projections of the midgut region of E12.5 *Jag1<sup>ΔFoxa2/+</sup>* and  
649 *Jag1<sup>ΔFoxa2/-</sup>* littermates stained for Cdh1, Muc1 and Sox9 as indicated by whole-mount  
650 IF. White brackets indicate the Muc1 staining in the body region of the dorsal  
651 pancreata to emphasize the luminal plexus regions shown in insets below the main

652 panels. dp: dorsal pancreas, vp: ventral pancreas. Scale bars are 50  $\mu\text{m}$  (main panels)  
653 and 25  $\mu\text{m}$  (insets).

654 (B) Upper panels: 3D maximum intensity projections of whole-mount, Muc1 labeled  
655 E15.5 *Jag1* <sup>$\Delta$ Foxa2/+</sup>, *Jag1* <sup>$\Delta$ Foxa2/-</sup>, *Dll1* <sup>$\Delta$ Foxa2/+</sup>, and *Dll1* <sup>$\Delta$ Foxa2/-</sup> pancreata. Scale bar is 300  
656  $\mu\text{m}$ . Middle panels: Higher power images of maximum intensity projections from sub-  
657 stacks acquired from the boxed areas indicated in upper panels showing Muc1 and  
658 Sox9 distribution. Scale bar is 50  $\mu\text{m}$ . Lower panels: Higher power images of boxed  
659 areas indicated in middle panels showing Muc1 alone to emphasize the structure of  
660 the terminal ducts. Arrowheads: Terminal duct lumens appear serrated in *Jag1* <sup>$\Delta$ Foxa2/-</sup>  
661 mutants while heterozygote littermate controls and *Dll1* <sup>$\Delta$ Foxa2/-</sup> mutants show smooth  
662 lumens. dp: dorsal pancreas, vp: ventral pancreas. Scale bar is 10  $\mu\text{m}$ .

663 (C) 3D maximum intensity projections of E18.5 *Jag1* <sup>$\Delta$ Foxa2/+</sup> and *Jag1* <sup>$\Delta$ Foxa2/-</sup> whole-  
664 mount pancreata stained for Muc1 and YFP as indicated. dp: dorsal pancreas, gl:  
665 gastric lobe, vp: ventral pancreas, du:duodenum. Scale bar is 700  $\mu\text{m}$ .

666 (D) 3D maximum intensity projections of the same pancreata shown in (C). Note  
667 absence of both interlobular and large intralobular ducts in *Jag1* <sup>$\Delta$ Foxa2/-</sup> mutants  
668 compared to controls. Boxed areas indicate regions shown at higher magnifications in  
669 lower panels. Scale bars are 100  $\mu\text{m}$  (upper panels) and 25  $\mu\text{m}$  (lower panels).

670 (E-G) Sections of E18.5 *Jag1* <sup>$\Delta$ Foxa2/+</sup> and *Jag1* <sup>$\Delta$ Foxa2/-</sup> pancreata stained for insulin (Ins),  
671 glucagon (Gcg) and somatostatin (Sst) (E), Muc1, Krt19 and DBA (F), or Cpa1, amylase  
672 (Amy) and Ptf1a as indicated (G). md: main duct, (disrupted in mutants), icd:  
673 intercalated ducts (abnormal morphology in mutants), "ADM": ADM-like structures.  
674 Scale bars are 25  $\mu\text{m}$ .

675 (H-I) Sections of E15.5 and E18.5 *Jag1* <sup>$\Delta$ Foxa2/+</sup> and *Jag1* <sup>$\Delta$ Foxa2/-</sup> pancreata stained for ZO-  
676 1, Ptf1a, Sox9 and YFP or ZO-1, Ptf1a, Cpa1 and YFP as indicated (H) and PKC $\zeta$ , Ptf1a,  
677 Pdx1 and YFP or PKC $\zeta$ , Ptf1a, Cpa1 and YFP as indicated (I). Arrows: Ptf1a<sup>+</sup> duct-like  
678 structures in E15.5 *Jag1* <sup>$\Delta$ Foxa2/-</sup> mutants and apical ZO-1 and PKC $\zeta$  in E18.5 duct cells in  
679 control mice. Arrowheads: apical ZO-1 in the E15-5 Ptf1a<sup>+</sup> PAC domain and in E18.5  
680 Ptf1a<sup>+</sup>Cpa1<sup>+</sup> acinar cells. Asterisks: Absence of apical ZO-1 and PKC $\zeta$  in  
681 YFP<sup>+</sup>Ptf1a<sup>+</sup>Cpa1<sup>+</sup> ADM-like structures ("ADM") in E18.5 *Jag1* <sup>$\Delta$ Foxa2/-</sup> pancreas. Scale  
682 bars, 25  $\mu\text{m}$ . ac: acini, bp: bi-potent progenitor domain, dt: ducts.

683

## 684 **Methods**

685 **Animals.** Published mouse strains were genotyped according to the original work:  
686 *R26<sup>LSL-dnMam1-EGFP</sup>* (Horn et al., 2012), *Gt(ROSA)26Sortm1(EYFP)Cos* (*R26<sup>LSL-YFP</sup>* reporter  
687 (Srinivas et al., 2001)), *Gt(ROSA)26Sortm3(CAG-EYFP)Hze* (*R26<sup>LSL-Ai3</sup>* reporter (Madisen  
688 et al., 2010)), *Mib1<sup>tm2Kong</sup>* (floxed *Mib1* (Koo et al., 2007)), *Dll1<sup>tm1Gos</sup>* (*Dll1<sup>LacZ</sup>* null allele  
689 (Hrabe de Angelis et al., 1997)), *Dll1<sup>tm1.1Hri</sup>* (floxed *Dll1* (Horn et al., 2012)), *Jag1<sup>tm1Grid</sup>*  
690 (*Jag1* null allele (Xue et al., 1999)), *Jag1<sup>tm2Grid</sup>* (floxed *Jag1* (Kiernan et al., 2006)),  
691 *Tg(Hes1-EGFP)<sup>1Hri</sup>* (BAC transgenic *Hes1-EGFP* reporter (Klinck et al., 2011)), *Hes1<sup>tm1Fgu</sup>*  
692 (*Hes1* null allele (Ishibashi et al., 1995)), *Foxa2<sup>T2AiCre</sup>* (Cre add-on allele (Horn et al.,  
693 2012)), *Hnf1b-CreER<sup>T2</sup>* (Solar et al., 2009), *Sox9-CreER<sup>T2</sup>* (Kopp et al., 2011), *Ptf1a<sup>Cre</sup>*  
694 (Kawaguchi et al., 2002) and *Notch1<sup>tm4(cre)Rko</sup>* (N1IP::Cre<sup>HI</sup> (Liu et al., 2015)), Luc2-Hes1  
695 (BAC transgenic Luciferase-Hes1 fusion protein reporter (Imayoshi et al., 2013)), and  
696 lastly *Dll1<sup>tm1.1Kag</sup>* (*Dll1-Fluc*), *Dll1<sup>tm4.1(Dll1)Kag</sup>* (*Dll1* Type 1 mutant), and *Dll1<sup>tm5.1(Dll1)Kag</sup>*  
697 (*Dll1* Type 2 mutant) all from (Shimojo and Kageyama, 2016). Additional genotyping  
698 primers are given in Supplementary Table 1. Homozygous *Dll1<sup>D1Vmc</sup>* and *Jag1<sup>J1Vmc</sup>* mice  
699 are viable and fertile, but were maintained and analyzed as heterozygotes due to  
700 *Dll1<sup>D1Vmc</sup>* being a weak hypomorph evident by short, kinky tails in homozygote animals.  
701 Generation of Jag1 C-terminal Venus-T2A-mCherry fusion reporter knock-in construct  
702 was conducted using a BAC clone (RP23-173O12) from the BACPAC Resources Center  
703 at Children's Hospital Oakland Research Institute. An frt-PGK-EM7-Neo-frt cassette  
704 was inserted downstream of a Venus-T2A-mCherry reporter in pBluescript II SK+,  
705 flanked by 300-500-bp homology arms from the *Jag1* gene with the *Jag1* stop codon  
706 removed. BAC targeting cassettes were excised and electroporated into competent  
707 SW105 cells containing the BAC clone of interest. Correctly targeted BAC clones were  
708 identified by a panel of PCR primers and restriction digestions. The knock-in cassette  
709 fragment was retrieved and cloned into pMCS-DTA (a kind gift from Dr. Kosuke Yusa,  
710 Osaka University, Japan). The 5'- and 3'-homology arms in the retrieval vector were  
711 designed such that 2.5- and 7.5-kb DNA segments flanked the Venus-T2A-mCherry  
712 reporter-frt-PGK-EM7-Neo-frt cassette in the BAC clone, which was then subcloned  
713 into pMCS-DTA. The shorter homology arm was used to design PCR-based screening  
714 for targeted ES cells (TT2). Chimeric mice were produced from successfully targeted



715 ES cell clones by aggregation with ICR embryos. Germ line transmission of the targeted  
716 allele was assessed by PCR of tail DNA. pCAG-FLPe mice (Kanki et al., 2006) were used  
717 to remove the frt-PGK-EM7-Neo-frt cassette. The Dll1-Venus-T2A-mCherry knock-in  
718 mice were generated by a similar strategy using a *Dll1* containing BAC clone (RP23-  
719 306J23).

720 *Jag1*<sup>ΔFoxa2</sup> and *Dll1*; *Jag1*<sup>ΔFoxa2</sup>: We first introduced a *Jag1* null allele (Xue et al., 1999)  
721 on the chromosome carrying the *Foxa2*<sup>iCre</sup> allele via meiotic crossover. Animals  
722 carrying *Jag1*<sup>-</sup>; *Foxa2*<sup>iCre</sup> chromosomes were then backcrossed to homozygous  
723 *Foxa2*<sup>iCre/iCre</sup> animals to secure this chromosome from further crossover events. *Jag1*<sup>+/-</sup>;  
724 *Foxa2*<sup>iCre/iCre</sup> animals were next crossed with *Jag1*<sup>fl/fl</sup>*R26*<sup>YFP/YFP</sup> animals to generate  
725 *Jag1*<sup>ΔFoxa2</sup> embryos and to *Dll1*<sup>fl/+</sup>; *Foxa2*<sup>T2AiCre/T2AiCre</sup> animals to generate *Jag1*<sup>+/-</sup>; *Dll1*<sup>fl/+</sup>;  
726 *Foxa2*<sup>T2AiCre/T2AiCre</sup> mice. The latter was then crossed with *Jag1*<sup>fl/fl</sup>; *Dll1*<sup>fl/fl</sup>; *R26*<sup>YFP/YFP</sup>  
727 animals to generate *Jag1*; *Dll1*<sup>ΔFoxa2</sup> embryos. *Dll1*<sup>ΔFoxa2</sup> embryos and *R26*<sup>YFP</sup> controls  
728 were made as previously described (Horn et al., 2012). Noon on the day of vaginal plug  
729 appearance was considered E0.5. All animal experiments described herein were  
730 conducted in accordance with local legislation and authorized by the local regulatory  
731 authorities.

732

733 **Tamoxifen administration.** Tamoxifen (Sigma-Aldrich, St. Louis, MO) was dissolved at  
734 10 mg/ml in corn oil (Sigma) and a single dose of 75 μg/g (for *Hnf1b*- and *Sox9*-CreERT<sup>2</sup>-  
735 mediated *R26*<sup>YFP/dnMaml1-eGFP</sup> induction) or 40 μg/g (for *Sox17*<sup>CreERT2</sup>-mediated ligand  
736 deletion) body-weight administered by intraperitoneal injection at noon ± 1 hour.

737

738 **Explant culture.** Dorsal pancreata from luciferase reporter embryos were isolated at  
739 E10.5 or E12.5 and cultured on 35 mm glass-bottom μ-dishes (Ibidi) coated with 0.1  
740 mg/mL Fibronectin (Sigma-Aldrich, St. Louis, MO) in explant culture medium: M199  
741 (Gibco?) supplemented with 10% FCS, 1% Pen/strep, 1% Fungizone, 25 ng/ml EGF, 25  
742 ng/ml FGF2 and 100 ng/ml FGF10 (R&D Systems). The explants were incubated at 37°C,  
743 20% O<sub>2</sub> and 5% CO<sub>2</sub>. The explants dissected at E10.5 were cultured for various  
744 durations as indicated in the main text. The Dll1-Luc2 explants dissected at E12.5 were  
745 cultured for 4 hours before over-night (20 hours) imaging was initiated.

746

747 **Western blots.** 8-10 dorsal pancreata from E10.5 embryos were pooled and cultured  
748 for three hours in hanging drops of explant culture medium supplemented with either  
749 2.5  $\mu$ M DAPT (Sigma-Aldrich, St. Louis, MO), 5  $\mu$ M MLN4924 (Cayman Chemical, Ann  
750 Arbor, MI) or DMSO. Explants were lysed in lysis buffer (Cell Signaling Technology,  
751 Leiden, NL). Samples were sonicated and spun at 15.000 rpm for 20 min at 4°C, then  
752 reduced at 95°C for 10 min and loaded on a Bolt™ 4-12% gel Bis-Tris Plus acrylamide  
753 gel (Thermo Fischer Scientific, Slangerup, DK). Protein was transferred using a Novex™  
754 Semi-Dry Blotter (InVitrogen, Slangerup, DK) according to the manufacturers  
755 instructions and blocked in blocking buffer (5% milk in PBST (PBS w. 0.1% Tween20)).  
756 Membranes were incubated overnight at 4°C in primary antibodies diluted in blocking  
757 buffer and after washing in PBST the blots were developed with the SuperSignal West  
758 Dura ECL kit (InVitrogen, Slangerup, DK). Primary antibodies were rabbit monoclonal  
759 anti-cleaved Notch1 (Val1744) (Cell Signaling Technology, Leiden, NL) at 1:1000 and  
760 rat monoclonal anti-tubulin at 1:5000 (Abcam, Cambridge, UK).

761

762 **Immunostaining.** All primary antibodies are listed with dilution in Supplementary  
763 Table 2. Dissected whole embryos (E10.5-E12.5) and foregut preparations (E13.5-  
764 E18.5) were fixed in 4% paraformaldehyde in PBS, embedded in Tissue-Tek O.C.T.  
765 (Sakura Finetek) and cryosectioned at 10  $\mu$ m. For immunofluorescence analysis,  
766 antigen retrieval was conducted in pH6.0 citrate buffer, followed by permeabilization  
767 in 0.15% Triton X-100 in PBS. After blocking in 1% normal donkey serum in PBS with  
768 0.1% Tween-20, sections were incubated overnight at 4°C with primary antibodies  
769 diluted in the same buffer. Primary antibodies were detected with anti-rabbit, guinea  
770 pig, mouse, rat, goat, sheep or chicken donkey-raised secondary antibodies  
771 conjugated to either Cy5 (1:500), Cy3 (1:1,000), Alexa Fluor 488 (1:1,000) or DyLight  
772 405 (1:200) (all Jackson ImmunoResearch Europe, Ely, UK). Slides were mounted in  
773 Vectashield (Vector Laboratories, Burlingame, CA) with or without DAPI for  
774 counterstaining nuclei. Whole-mount IF of E10.5 whole embryos and E12.5, E15.5 and  
775 E18.5 foregut preparations was performed as previously described (Ahnfelt-Ronne et  
776 al., 2007). Specimens were cleared with BABB (benzyl alcohol:benzyl benzoate 1:2)

777 then scanned confocally for z-stack image acquisition. Images were captured on a  
778 Leica SP8 or Zeiss LSM780 confocal microscope and figures prepared using Adobe  
779 Photoshop/Illustrator CS6 (Adobe Systems, San Jose, CA, USA). Cultured explants were  
780 fixed in 4% PFA for 40 min at room temperature followed by antigen retrieval for 1  
781 hour at 37°C in citrate buffer (pH 6.0, 0.1 M 9.5% citric acid, 0.1 M 41.5% sodium  
782 citrate and 49% ddH<sub>2</sub>O). 3x 10 min wash in PBS at room temperature. Permeabilization  
783 in 1% Triton-X-100 diluted in PBS for 40 min. Block in 1% Normal Donkey Serum (#017-  
784 00-121) (Jackson ImmunoResearch Europe, Ely, UK) diluted in PBST. Explant were  
785 incubated in primary antibodies diluted in blocking buffer at 4°C overnight. The  
786 following day, explants were washed 3x 10 min in PSB followed by 2-hour incubation  
787 at room temperature with secondary antibodies diluted in blocking buffer.

788

789 **Antibody validation.** Antisera against Dll1, Jag1, and Hes1 were validated by IF  
790 analysis of E10.5 neural tube from embryos that were either wildtype or null for the  
791 relevant gene (Figure S7). Two characteristic stripes of Jag1 in the neural tube  
792 (Johnston et al., 1997) and uniform but weak Jag1 in the E10.5 pancreas was detected  
793 by both anti-Jag1 antisera in wild type tissue, but not in equivalent *Jag1*-null tissue.  
794 The anti-Dll1 antibody detected Dll1 in the expected reciprocal pattern (compared to  
795 Jag1) in the neural tube and scattered cells in the pancreas of wild type embryos, but  
796 not *Dll1*<sup>-/-</sup> embryos. The rabbit monoclonal anti-Hes1 antibody detected Hes1 in the  
797 expected patterns in both wild type tissues (i.e. prominently in floor plate and dorsal  
798 neural tube as well as pancreatic epithelium and weakly in the surrounding  
799 mesenchyme), but not in *Hes1*<sup>-/-</sup> tissues.

800

801 **Bioluminescence imaging.** Explants were imaged on a heated stage of an inverted  
802 microscope (Olympus IX83) and maintained at 37°C in 5% CO<sub>2</sub>. The bioluminescence  
803 signal was collected with an Olympus 40x UPLFN Universal Plan Fluorite oil immersion  
804 objective was transmitted directly to either a cooled Andor iXon Ultra 888 EMCCD  
805 camera or a cooled Andor iKon-M934 CCD camera (Oxford Instruments, Oxford, UK).  
806 The exposure time for Luc2-Hes1 was 5-10 min with no binning and for Dll1-Fluc it was  
807 10 minutes with 4x4 binning.

808

809 **Bioluminescence quantification.** Image sequences were analysed in Fiji (ImageJ  
810 version 2.0.0, NIH). Noise from cosmic rays was removed using the SpikeNoise Filter,  
811 while single-cell tracking was optimized using the Savitzky-Golay Temporal Filter in Fiji.  
812 To track single cells the path was defined with the ROI tool and supported by a  
813 Maximum Projection image. False colour (Fire) was used to illustrate the signal  
814 intensity in each cell. Z-axis Profiler Plus was used to extract the bioluminescence  
815 signal per cell over time for peak-to-peak quantification in Microsoft Excel. Mean  
816 amplitude for each oscillating cell was calculated as the difference in relative  
817 luciferase activity (a.u.) between individual peaks (P) and troughs (T) using the  
818 equation: Mean amplitude =  $(P_1 - T_1) + (P_2 - T_2) + \dots + (P_n - T_n)/n$ . The local background  
819 arising from light scattering in the explants was measured in nine ROIs adjacent to  
820 oscillatory cells for each time-lapse movie and the average local background was  
821 subtracted from the raw bioluminescence signals before plotting tracks. Background  
822 from noise in the EMCCD camera was negligible.

823

824 **Cell quantification.** ~400 cells YFP<sup>+</sup> lineage-traced cells were counted on 9-11 evenly  
825 spaced optical sections through the pancreas from each of three E12.5 N1IP::Cre<sup>H1</sup>;  
826 *Rosa26*<sup>LSL-Ai3</sup> embryos and scored for co-expression of Sox9 and Ptf1a. YFP<sup>+</sup> and GFP<sup>+</sup>  
827 lineage-traced cells from *Hnf1b*-CreERT<sup>2</sup>; *R26*<sup>YFP</sup> and *R26*<sup>dnMam1-GFP</sup> embryos,  
828 respectively, were counted on every fifth section throughout the pancreas, for a total  
829 of >200 cells/embryo, for each marker combination. Ptf1a<sup>+</sup>Nkx6.1<sup>-</sup>, Ptf1a<sup>-</sup>Nkx6.1<sup>+</sup> and  
830 Ptf1a<sup>+</sup>Nkx6.1<sup>+</sup> cells were quantified on every fifth section throughout dorsal pancreas  
831 from E12.5 controls (*R26*<sup>Yfp/+</sup>; *Sox17*<sup>CreERT/+</sup>), *Dll1*<sup>ΔSox17Tam</sup>, *Jag1*<sup>ΔSox17Tam</sup>,  
832 *Dll1/Jag1*<sup>ΔSox17Tam</sup> using Imaris™ (Oxford Instruments, Oxford, UK). E12.5 *Jag1*<sup>ΔFoxa2</sup>  
833 embryos were quantified the same way but with their own controls (see below). For  
834 quantification of E12.5 *Jag1*<sup>ΔFoxa2</sup> Hes1 IF signal intensity in distal-most Ptf1a<sup>+</sup> cells,  
835 corrected total cell fluorescence (CTCF) was determined using FIJI (Burgess et al., 2010;  
836 McCloy et al., 2014). Numbers of Ptf1a<sup>+</sup>Nkx6.1<sup>-</sup>, Ptf1a<sup>-</sup>Nkx6.1<sup>+</sup> and Ptf1a<sup>+</sup>Nkx6.1<sup>+</sup> cells  
837 as well as Sox9<sup>+</sup> and insulin<sup>+</sup> cells were manually scored from every tenth section of  
838 dorsal pancreata from E15.5 controls (*R26*<sup>Yfp/+</sup>; *Foxa2*<sup>iCre/+</sup>; *Dll1*<sup>+/+</sup>; *Jag1*<sup>+/+</sup>), *Jag1*<sup>ΔFoxa2</sup>,  
839 *Dll1*<sup>ΔFoxa2</sup> and *Jag1/Dll1*<sup>ΔFoxa2</sup> embryos and expressed relative to the area (in mm<sup>2</sup>) of  
840 the YFP<sup>+</sup> dorsal pancreatic epithelium using Fiji.

841

842 **Statistical analyses.** An F test was used to compare variances. Data sets with two  
 843 groups having equal variances were analyzed by a two-tailed (unless otherwise  
 844 indicated) Student's t tests. For data with unequal variances we used two-tailed  
 845 Welch's t tests. Data sets with multiple groups were analyzed by one-way ANOVA,  
 846 followed by Tukey's post hoc test for multiple comparisons using the Prism statistical  
 847 program (GraphPad, San Diego, CA). Results were expressed as mean  $\pm$  S.D. and  
 848 sample numbers are indicated in the figures. A minimum of three embryos per  
 849 genotype were examined, except for *Jag1*; *Dll1* <sup>$\Delta$ Foxa2</sup> for which three years of breeding  
 850 have so far only yielded two embryos.

851

852 **Supplemental information**

853 **Supplementary Table 1**

854 Genotyping primers.

855 D1VmC genotyping primers: Fwd: 5'-CTTCAAAGGACACCAAGTACCAGTCG-3', WT-Rev:

856 5'-CTGTCCATAGTGCAATGGGAACAACC 3', Venus-Rev: 5'

857 CTTGCTCACCATAAAGATGCGACCTCC 3'

858

859 J1VmC genotyping primers: Fwd: 5' CAACACGGTCCCCATTAAGGATTACGAG 3', WT-

860 Rev: 5' CTGTCCATAGTGCAATGGGAACAACC 3', Venus-Rev: as above.

861

862 **Supplemental Table 2. Antibodies employed in immunofluorescence analyses**

863

| Primary Antibodies |            |                                                              |             |          |
|--------------------|------------|--------------------------------------------------------------|-------------|----------|
| Antigen            | Species    | Source                                                       | Catalogue # | Dilution |
| Pdx1               | Goat       | NIH Beta Cell Biology Consortium (BCBC)                      | AB2027      | 1:10,000 |
| Sox9               | Guinea Pig | Gift from Ole Madsen/Novo Nordisk                            | N/A         | 1:2,000  |
| Sox9               | Rabbit     | EMD Millipore (Merck)                                        | AB5535      | 1:1,000  |
| Ptf1a              | Rabbit     | NIH BCBC                                                     | AB2153      | 1:3,000  |
| Ptf1a              | Guinea Pig | Gift from Jane E. Johnson, UT Southwestern<br>Medical Center | N/A         | 1:5,000  |

|                         |                      |                                      |             |                      |
|-------------------------|----------------------|--------------------------------------|-------------|----------------------|
| CPA1                    | Goat                 | R&D Systems                          | AF2765      | 1:200                |
| Amylase                 | Rabbit               | Sigma-Aldrich (Merck)                | A8273       | 1:500 <sup>1</sup>   |
| Mist1                   | Rabbit mAb           | Cell Signaling Technology            | 14896       | 1:500 <sup>1</sup>   |
| Nkx6.1                  | Mouse                |                                      |             | 1:500 <sup>2</sup>   |
| Nkx6.1                  | Rabbit               | NIH BCBC                             | AB1069      | 1:2,000 <sup>1</sup> |
| Ngn3                    | Rabbit               | NIH BCBC                             | AB2011      | 1:4,000              |
| Ngn3                    | Chicken              | NIH BCBC/Chris V. E. Wright          | AB3854      | 1:1,000              |
| Chromogranin-A          | Goat                 | Santa Cruz                           | sc-1488     | 1:200                |
| Insulin                 | Guinea Pig           | Abcam                                | ab7842      | 1:200                |
| Insulin                 | Guinea Pig           | Dako (Agilent)                       | A0564       | 1:800                |
| Glucagon                | Mouse                | Sigma-Aldrich (Merck)                | G2654       | 1:800                |
| Glucagon                | Guinea Pig           | Millipore                            | 4031-01F    | 1:4,000              |
| Somatostatin            | Rabbit               | Dako (Agilent)                       | A0566       | 1:2,000 <sup>1</sup> |
| DBA                     | N/A                  | Vector Labs                          | B-1035      | 1:500 <sup>3</sup>   |
| Krt19 (CK19, TROMA-III) | Rat                  | Developmental Studies Hybridoma Bank | N/A         | 1:100 <sup>4</sup>   |
| Muc1                    | Armenian Hamster mAb | Thermo Fisher (Invitrogen)           | MA5-11202   | 1:200                |
| ZO-1 (R26.4C)           | Rat                  | Developmental Studies Hybridoma Bank | N/A         | 1:1,000 <sup>4</sup> |
| PKC $\zeta$             | Rabbit               | Santa Cruz                           | sc-216      | 1:800                |
| E-Cadherin              | Mouse                | BD Biosciences                       | 610181      | 1:2,000              |
| E-Cadherin              | Rat                  | Novo Nordisk                         | N/A         | 1:1,000              |
| Pecam1/CD31             | Rat                  | BD Biosciences                       | 550274      | 1:50                 |
| Dll1                    | Sheep                | R&D Systems                          | AF3970      | 1:200                |
| Jag1                    | Goat                 | Santa Cruz Biotechnology             | sc-6011     | 1:200                |
| Jag1                    | Rabbit mAb           | Cell Signaling Technology            | 2620        | 1:50                 |
| Notch1                  | Sheep                | R&D Systems                          | AF5267      | 1:200                |
| Notch2                  | Goat                 | R&D Systems                          | AF1190      | 1:200                |
| Hes1                    | Rabbit mAb           | Cell Signaling Technology            | 11988       | 1:200                |
| GFP                     | Chicken              | Abcam                                | ab13970     | 1:1,000              |
| GFP                     | Rabbit               | Clontech                             | 632460      | 1:1,000              |
| RFP                     | Rabbit               | Rockland                             | 600-401-379 | 1:2,000              |

864

865 <sup>1</sup> Detected with (1:500) Cy3-conjugated F(ab')<sub>2</sub> fragment donkey anti-rabbit IgG (Jackson

866 ImmunoResearch Europe; 711-166-152)

867 <sup>2</sup> Blocking and antibody incubations performed using M.O.M. Basic Kit (Vector Labs; BMK-

868 2202)

869 <sup>3</sup> Biotinylated DBA detected with (30 µg/ml) AMCA Avidin D (Vector Labs; A-2008)

870 <sup>4</sup> Concentrate

871

872

873 **Movie S1.** Time-lapse movie of explanted E10.5 Luc2-Hes1 dorsal pancreatic bud  
874 cultured for 24 hours before imaging commenced. Individual Luc2-Hes1 expressing  
875 nuclei are displaying ultradian oscillations. The movie shows 20 hours of development  
876 and each frame is 10 minutes.

877

878 **Movie S2.** Time-lapse movie of explanted E10.5 Luc2-Hes1 dorsal pancreatic bud  
879 cultured for 96 hours before imaging commenced. Individual Luc2-Hes1 expressing  
880 nuclei are displaying ultradian oscillations. The movie shows 20 hours of development  
881 and each frame is 10 minutes.

882

883 **Movie S3.** Time-lapse movie of explanted E10.5 Luc2-Hes1 dorsal pancreatic bud  
884 cultured for 144 hours before imaging commenced. Individual Luc2-Hes1 expressing  
885 nuclei are displaying ultradian oscillations. The movie shows 20 hours of development  
886 and each frame is 10 minutes.

887

888 **Movie S4.** Time-lapse movie of explanted E12.5 Dll1-Fluc dorsal pancreatic bud  
889 cultured for 4 hours before imaging commenced. Individual Luc2-Hes1 expressing  
890 nuclei are displaying ultradian oscillations. The movie shows 20 hours of development  
891 and each frame is 10 minutes.

## References

- Afelik, S., Qu, X., Hasrouni, E., Bukys, M.A., Deering, T., Nieuwoudt, S., Rogers, W., Macdonald, R.J., and Jensen, J. (2012). Notch-mediated patterning and cell fate allocation of pancreatic progenitor cells. *Development* 139, 1744-1753.
- Ahlgren, U., Pfaff, S.L., Jessell, T.M., Edlund, T., and Edlund, H. (1997). Independent requirement for ISL1 in formation of pancreatic mesenchyme and islet cells. *Nature* 385, 257-260.
- Ahnfelt-Ronne, J., Jorgensen, M.C., Hald, J., Madsen, O.D., Serup, P., and Hecksher-Sorensen, J. (2007). An improved method for three-dimensional reconstruction of protein expression patterns in intact mouse and chicken embryos and organs. *J Histochem Cytochem* 55, 925-930.
- Ahnfelt-Rønne, J., Jørgensen, M.C., Klinck, R., Jensen, J.N., Füchtbauer, E., Deering, T., MacDonald, R.J., Wright, C.V., Madsen, O.D., and Serup, P. (2012). Ptf1a-mediated control of Dll1 reveals an alternative to the lateral inhibition mechanism. *Development* 139, 33-45.
- Apelqvist, A., Li, H., Sommer, L., Beatus, P., Anderson, D.J., Honjo, T., Hrabe de Angelis, M., Lendahl, U., and Edlund, H. (1999). Notch signalling controls pancreatic cell differentiation. *Nature* 400, 877-881.
- Bankaitis, E.D., Bechard, M.E., and Wright, C.V. (2015). Feedback control of growth, differentiation, and morphogenesis of pancreatic endocrine progenitors in an epithelial plexus niche. *Genes Dev* 29, 2203-2216.
- Burgess, A., Vigneron, S., Brioudes, E., Labbe, J.C., Lorca, T., and Castro, A. (2010). Loss of human Greatwall results in G2 arrest and multiple mitotic defects due to deregulation of the cyclin B-Cdc2/PP2A balance. *Proc Natl Acad Sci U S A* 107, 12564-12569.
- Choi, E., Kraus, M.R., Lemaire, L.A., Yoshimoto, M., Vemula, S., Potter, L.A., Manduchi, E., Stoeckert, C.J., Jr., Grapin-Botton, A., and Magnuson, M.A. (2012). Dual lineage-specific expression of Sox17 during mouse embryogenesis. *Stem cells (Dayton, Ohio)* 30, 2297-2308.
- Cras-Meneur, C., Li, L., Kopan, R., and Permutt, M.A. (2009). Presenilins, Notch dose control the fate of pancreatic endocrine progenitors during a narrow developmental window. *Genes Dev* 23, 2088-2101.
- Dale, J.K., Maroto, M., Dequeant, M.L., Malapert, P., McGrew, M., and Pourquie, O. (2003). Periodic notch inhibition by lunatic fringe underlies the chick segmentation clock. *Nature* 421, 275-278.
- de Lichtenberg, K.H., Nakic, N., Funa, N., Zhu, Z., Huangfu, D., Ferrer, J., and Serup, P. (2018a). Genome-wide identification of HES1 target genes uncover novel roles for HES1 in pancreatic development. *bioRxiv*, 335869.
- de Lichtenberg, K.H., Seymour, P.A., Jørgensen, M.C., Kim, Y.-H., Grapin-Botton, A., Magnuson, M.A., Nakic, N., Ferrer, J., and Serup, P. (2018b). Notch controls multiple cell fate regulators through direct Hes1-mediated repression. *bioRxiv*, 336305.
- Engert, S., Liao, W.P., Burtscher, I., and Lickert, H. (2009). Sox17-2A-iCre: a knock-in mouse line expressing Cre recombinase in endoderm and vascular endothelial cells. *Genesis* 47, 603-610.
- Fujikura, J., Hosoda, K., Iwakura, H., Tomita, T., Noguchi, M., Masuzaki, H., Tanigaki, K., Yabe, D., Honjo, T., and Nakao, K. (2006). Notch/Rbp-j signaling prevents premature endocrine and ductal cell differentiation in the pancreas. *Cell Metab* 3, 59-65.



- Fujikura, J., Hosoda, K., Kawaguchi, Y., Noguchi, M., Iwakura, H., Odori, S., Mori, E., Tomita, T., Hirata, M., Ebihara, K., *et al.* (2007). Rbp-j regulates expansion of pancreatic epithelial cells and their differentiation into exocrine cells during mouse development. *Dev Dyn* 236, 2779-2791.
- Golson, M.L., Le Lay, J., Gao, N., Bramswig, N., Loomes, K.M., Oakey, R., May, C.L., White, P., and Kaestner, K.H. (2009a). Jagged1 is a competitive inhibitor of Notch signaling in the embryonic pancreas. *Mechanisms of development* 126, 687-699.
- Golson, M.L., Loomes, K.M., Oakey, R., and Kaestner, K.H. (2009b). Ductal malformation and pancreatitis in mice caused by conditional Jag1 deletion. *Gastroenterology* 136, 1761-1771 e1761.
- Gradwohl, G., Dierich, A., LeMeur, M., and Guillemot, F. (2000). neurogenin3 is required for the development of the four endocrine cell lineages of the pancreas. *Proc Natl Acad Sci U S A* 97, 1607-1611.
- Gu, G., Dubauskaite, J., and Melton, D.A. (2002). Direct evidence for the pancreatic lineage: NGN3+ cells are islet progenitors and are distinct from duct progenitors. *Development* 129, 2447-2457.
- Hald, J., Hjorth, J.P., German, M.S., Madsen, O.D., Serup, P., and Jensen, J. (2003). Activated Notch1 prevents differentiation of pancreatic acinar cells and attenuate endocrine development. *Dev Biol* 260, 426-437.
- Hald, J., Sprinkel, A.E., Ray, M., Serup, P., Wright, C., and Madsen, O.D. (2008). Generation and characterization of Ptf1a antiserum and localization of Ptf1a in relation to Nkx6.1 and Pdx1 during the earliest stages of mouse pancreas development. *J Histochem Cytochem* 56, 587-595.
- Horn, S., Kobberup, S., Jorgensen, M.C., Kalisz, M., Klein, T., Kageyama, R., Gegg, M., Lickert, H., Lindner, J., Magnuson, M.A., *et al.* (2012). Mind bomb 1 is required for pancreatic beta-cell formation. *Proc Natl Acad Sci U S A* 109, 7356-7361.
- Hrabe de Angelis, M., McIntyre, J., 2nd, and Gossler, A. (1997). Maintenance of somite borders in mice requires the Delta homologue Dll1. *Nature* 386, 717-721.
- Imayoshi, I., Isomura, A., Harima, Y., Kawaguchi, K., Kori, H., Miyachi, H., Fujiwara, T., Ishidate, F., and Kageyama, R. (2013). Oscillatory control of factors determining multipotency and fate in mouse neural progenitors. *Science* 342, 1203-1208.
- Ishibashi, M., Ang, S.L., Shiota, K., Nakanishi, S., Kageyama, R., and Guillemot, F. (1995). Targeted disruption of mammalian hairy and Enhancer of split homolog-1 (HES-1) leads to up-regulation of neural helix-loop-helix factors, premature neurogenesis, and severe neural tube defects. *Genes Dev* 9, 3136-3148.
- Itoh, M., Kim, C.H., Palardy, G., Oda, T., Jiang, Y.J., Maust, D., Yeo, S.Y., Lorick, K., Wright, G.J., Ariza-McNaughton, L., *et al.* (2003). Mind bomb is a ubiquitin ligase that is essential for efficient activation of Notch signaling by Delta. *Dev Cell* 4, 67-82.
- Jensen, J., Heller, R.S., Funder-Nielsen, T., Pedersen, E.E., Lindsell, C., Weinmaster, G., Madsen, O.D., and Serup, P. (2000a). Independent development of pancreatic alpha- and beta-cells from neurogenin3-expressing precursors: a role for the notch pathway in repression of premature differentiation. *Diabetes* 49, 163-176.
- Jensen, J., Pedersen, E.E., Galante, P., Hald, J., Heller, R.S., Ishibashi, M., Kageyama, R., Guillemot, F., Serup, P., and Madsen, O.D. (2000b). Control of endodermal endocrine development by Hes-1. *Nat Genet* 24, 36-44.
- Johnston, S.H., Rauskolb, C., Wilson, R., Prabhakaran, B., Irvine, K.D., and Vogt, T.F. (1997). A family of mammalian Fringe genes implicated in boundary determination and the Notch pathway. *Development* 124, 2245-2254.

- Jorgensen, M.C., de Lichtenberg, K.H., Collin, C.A., Klinck, R., Ekberg, J.H., Engelstoft, M.S., Lickert, H., and Serup, P. (2018). Neurog3-dependent pancreas dysgenesis causes ectopic pancreas in Hes1 mutants. *Development*.
- Kageyama, R., Ohtsuka, T., Shimojo, H., and Imayoshi, I. (2008). Dynamic Notch signaling in neural progenitor cells and a revised view of lateral inhibition. *Nat Neurosci* 11, 1247-1251.
- Kanki, H., Suzuki, H., and Itohara, S. (2006). High-efficiency CAG-FLPe deleter mice in C57BL/6J background. *Exp Anim* 55, 137-141.
- Kawaguchi, Y., Cooper, B., Gannon, M., Ray, M., MacDonald, R.J., and Wright, C.V. (2002). The role of the transcriptional regulator Ptf1a in converting intestinal to pancreatic progenitors. *Nat Genet* 32, 128-134.
- Kiernan, A.E., Xu, J., and Gridley, T. (2006). The Notch ligand JAG1 is required for sensory progenitor development in the mammalian inner ear. *PLoS Genet* 2, e4.
- Kim, W., Matsui, T., Yamao, M., Ishibashi, M., Tamada, K., Takumi, T., Kohno, K., Oba, S., Ishii, S., Sakumura, Y., *et al.* (2011). The period of the somite segmentation clock is sensitive to Notch activity. *Mol Biol Cell* 22, 3541-3549.
- Klinck, R., Fuchtbauer, E.M., Ahnfelt-Ronne, J., Serup, P., Jensen, J.N., and Jorgensen, M.C. (2011). A BAC transgenic Hes1-EGFP reporter reveals novel expression domains in mouse embryos. *Gene expression patterns : GEP* 11, 415-426.
- Koo, B.K., Lim, H.S., Song, R., Yoon, M.J., Yoon, K.J., Moon, J.S., Kim, Y.W., Kwon, M.C., Yoo, K.W., Kong, M.P., *et al.* (2005). Mind bomb 1 is essential for generating functional Notch ligands to activate Notch. *Development* 132, 3459-3470.
- Koo, B.K., Yoon, M.J., Yoon, K.J., Im, S.K., Kim, Y.Y., Kim, C.H., Suh, P.G., Jan, Y.N., and Kong, Y.Y. (2007). An obligatory role of mind bomb-1 in notch signaling of mammalian development. *PLoS One* 2, e1221.
- Kopinke, D., Brailsford, M., Shea, J.E., Leavitt, R., Scaife, C.L., and Murtaugh, L.C. (2011). Lineage tracing reveals the dynamic contribution of Hes1+ cells to the developing and adult pancreas. *Development* 138, 431-441.
- Kopp, J.L., Dubois, C.L., Schaffer, A.E., Hao, E., Shih, H.P., Seymour, P.A., Ma, J., and Sander, M. (2011). Sox9+ ductal cells are multipotent progenitors throughout development but do not produce new endocrine cells in the normal or injured adult pancreas. *Development* 138, 653-665.
- Lammert, E., Brown, J., and Melton, D.A. (2000). Notch gene expression during pancreatic organogenesis. *Mechanisms of development* 94, 199-203.
- Larsen, H.L., Martin-Coll, L., Nielsen, A.V., Wright, C.V.E., Trusina, A., Kim, Y.H., and Grapin-Botton, A. (2017). Stochastic priming and spatial cues orchestrate heterogeneous clonal contribution to mouse pancreas organogenesis. *Nat Commun* 8, 605.
- LeBon, L., Lee, T.V., Sprinzak, D., Jafar-Nejad, H., and Elowitz, M.B. (2014). Fringe proteins modulate Notch-ligand cis and trans interactions to specify signaling states. *Elife* 3, e02950.
- Lewis, J. (2003). Autoinhibition with transcriptional delay: a simple mechanism for the zebrafish somitogenesis oscillator. *Curr Biol* 13, 1398-1408.
- Liu, Z., Brunskill, E., Boyle, S., Chen, S., Turkoz, M., Guo, Y., Grant, R., and Kopan, R. (2015). Second-generation Notch1 activity-trap mouse line (N1IP::CreHI) provides a more comprehensive map of cells experiencing Notch1 activity. *Development* 142, 1193-1202.
- Lorent, K., Yeo, S.Y., Oda, T., Chandrasekharappa, S., Chitnis, A., Matthews, R.P., and Pack, M. (2004). Inhibition of Jagged-mediated Notch signaling disrupts zebrafish

biliary development and generates multi-organ defects compatible with an Alagille syndrome phenocopy. *Development* *131*, 5753-5766.

Madisen, L., Zwingman, T.A., Sunkin, S.M., Oh, S.W., Zariwala, H.A., Gu, H., Ng, L.L., Palmiter, R.D., Hawrylycz, M.J., Jones, A.R., *et al.* (2010). A robust and high-throughput Cre reporting and characterization system for the whole mouse brain. *Nat Neurosci* *13*, 133-140.

Magenheim, J., Klein, A.M., Stanger, B.Z., Ashery-Padan, R., Sosa-Pineda, B., Gu, G., and Dor, Y. (2011). Ngn3(+) endocrine progenitor cells control the fate and morphogenesis of pancreatic ductal epithelium. *Dev Biol* *359*, 26-36.

McCloy, R.A., Rogers, S., Caldon, C.E., Lorca, T., Castro, A., and Burgess, A. (2014). Partial inhibition of Cdk1 in G 2 phase overrides the SAC and decouples mitotic events. *Cell Cycle* *13*, 1400-1412.

Murtaugh, L.C., Stanger, B.Z., Kwan, K.M., and Melton, D.A. (2003). Notch signaling controls multiple steps of pancreatic differentiation. *Proc Natl Acad Sci U S A* *100*, 14920-14925.

Nakano, Y., Negishi, N., Gocho, S., Mine, T., Sakurai, Y., Yazawa, M., Abe, K., Yagita, H., Habu, S., Kageyama, R., *et al.* (2015). Disappearance of centroacinar cells in the Notch ligand-deficient pancreas. *Genes Cells* *20*, 500-511.

Nishikawa, Y., Kodama, Y., Shiokawa, M., Matsumori, T., Marui, S., Kuriyama, K., Kuwada, T., Sogabe, Y., Kakiuchi, N., Tomono, T., *et al.* (2019). Hes1 plays an essential role in Kras-driven pancreatic tumorigenesis. *Oncogene*.

Pan, F.C., Bankaitis, E.D., Boyer, D., Xu, X., Van de Casteele, M., Magnuson, M.A., Heimberg, H., and Wright, C.V. (2013). Spatiotemporal patterns of multipotentiality in Ptf1a-expressing cells during pancreas organogenesis and injury-induced facultative restoration. *Development* *140*, 751-764.

Pictet, R.L., Clark, W.R., Williams, R.H., and Rutter, W.J. (1972). An ultrastructural analysis of the developing embryonic pancreas. *Dev Biol* *29*, 436-467.

Schaffer, A.E., Freude, K.K., Nelson, S.B., and Sander, M. (2010). Nkx6 transcription factors and Ptf1a function as antagonistic lineage determinants in multipotent pancreatic progenitors. *Dev Cell* *18*, 1022-1029.

Shih, H.P., Kopp, J.L., Sandhu, M., Dubois, C.L., Seymour, P.A., Grapin-Botton, A., and Sander, M. (2012). A Notch-dependent molecular circuitry initiates pancreatic endocrine and ductal cell differentiation. *Development* *139*, 2488-2499.

Shih, H.P., Wang, A., and Sander, M. (2013). Pancreas organogenesis: from lineage determination to morphogenesis. *Annu Rev Cell Dev Biol* *29*, 81-105.

Shimojo, H., Isomura, A., Ohtsuka, T., Kori, H., Miyachi, H., and Kageyama, R. (2016). Oscillatory control of Delta-like1 in cell interactions regulates dynamic gene expression and tissue morphogenesis. *Genes Dev* *30*, 102-116.

Shimojo, H., and Kageyama, R. (2016). Oscillatory control of Delta-like1 in somitogenesis and neurogenesis: A unified model for different oscillatory dynamics. *Semin Cell Dev Biol* *49*, 76-82.

Shimojo, H., Ohtsuka, T., and Kageyama, R. (2008). Oscillations in notch signaling regulate maintenance of neural progenitors. *Neuron* *58*, 52-64.

Solar, M., Cardalda, C., Houbracken, I., Martin, M., Maestro, M.A., De Medts, N., Xu, X., Grau, V., Heimberg, H., Bouwens, L., *et al.* (2009). Pancreatic exocrine duct cells give rise to insulin-producing beta cells during embryogenesis but not after birth. *Dev Cell* *17*, 849-860.

Spooner, B.S., Walther, B.T., and Rutter, W.J. (1970). The development of the dorsal and ventral mammalian pancreas in vivo and in vitro. *J Cell Biol* *47*, 235-246.

- Sprinzak, D., Lakhanpal, A., Lebon, L., Santat, L.A., Fontes, M.E., Anderson, G.A., Garcia-Ojalvo, J., and Elowitz, M.B. (2010). Cis-interactions between Notch and Delta generate mutually exclusive signalling states. *Nature* *465*, 86-90.
- Srinivas, S., Watanabe, T., Lin, C.S., William, C.M., Tanabe, Y., Jessell, T.M., and Costantini, F. (2001). Cre reporter strains produced by targeted insertion of EYFP and ECFP into the ROSA26 locus. *BMC Dev Biol* *1*, 4.
- Svensson, P., Bergqvist, I., Norlin, S., and Edlund, H. (2009). MFng is dispensable for mouse pancreas development and function. *Mol Cell Biol* *29*, 2129-2138.
- Tiedemann, H.B., Schneltzer, E., Beckers, J., Przemeck, G.K.H., and Hrabe de Angelis, M. (2017). Modeling coexistence of oscillation and Delta/Notch-mediated lateral inhibition in pancreas development and neurogenesis. *J Theor Biol* *430*, 32-44.
- Villasenor, A., Chong, D.C., and Cleaver, O. (2008). Biphasic Ngn3 expression in the developing pancreas. *Dev Dyn* *237*, 3270-3279.
- Villasenor, A., Chong, D.C., Henkemeyer, M., and Cleaver, O. (2010). Epithelial dynamics of pancreatic branching morphogenesis. *Development* *137*, 4295-4305.
- Wessells, N.K., and Cohen, J.H. (1967). Early Pancreas Organogenesis: Morphogenesis, Tissue Interactions, and Mass Effects. *Dev Biol* *15*, 237-270.
- Wiedermann, G., Bone, R.A., Silva, J.C., Bjorklund, M., Murray, P.J., and Dale, J.K. (2015). A balance of positive and negative regulators determines the pace of the segmentation clock. *Elife* *4*, e05842.
- Xue, Y., Gao, X., Lindsell, C.E., Norton, C.R., Chang, B., Hicks, C., Gendron-Maguire, M., Rand, E.B., Weinmaster, G., and Gridley, T. (1999). Embryonic lethality and vascular defects in mice lacking the Notch ligand Jagged1. *Hum Mol Genet* *8*, 723-730.
- Yee, N.S., Lorent, K., and Pack, M. (2005). Exocrine pancreas development in zebrafish. *Dev Biol* *284*, 84-101.
- Zhang, D., Gates, K.P., Barske, L., Wang, G., Lancman, J.J., Zeng, X.I., Groff, M., Wang, K., Parsons, M.J., Crump, J.G., *et al.* (2017). Endoderm Jagged induces liver and pancreas duct lineage in zebrafish. *Nat Commun* *8*, 769.
- Zhou, Q., Law, A.C., Rajagopal, J., Anderson, W.J., Gray, P.A., and Melton, D.A. (2007). A multipotent progenitor domain guides pancreatic organogenesis. *Dev Cell* *13*, 103-114.

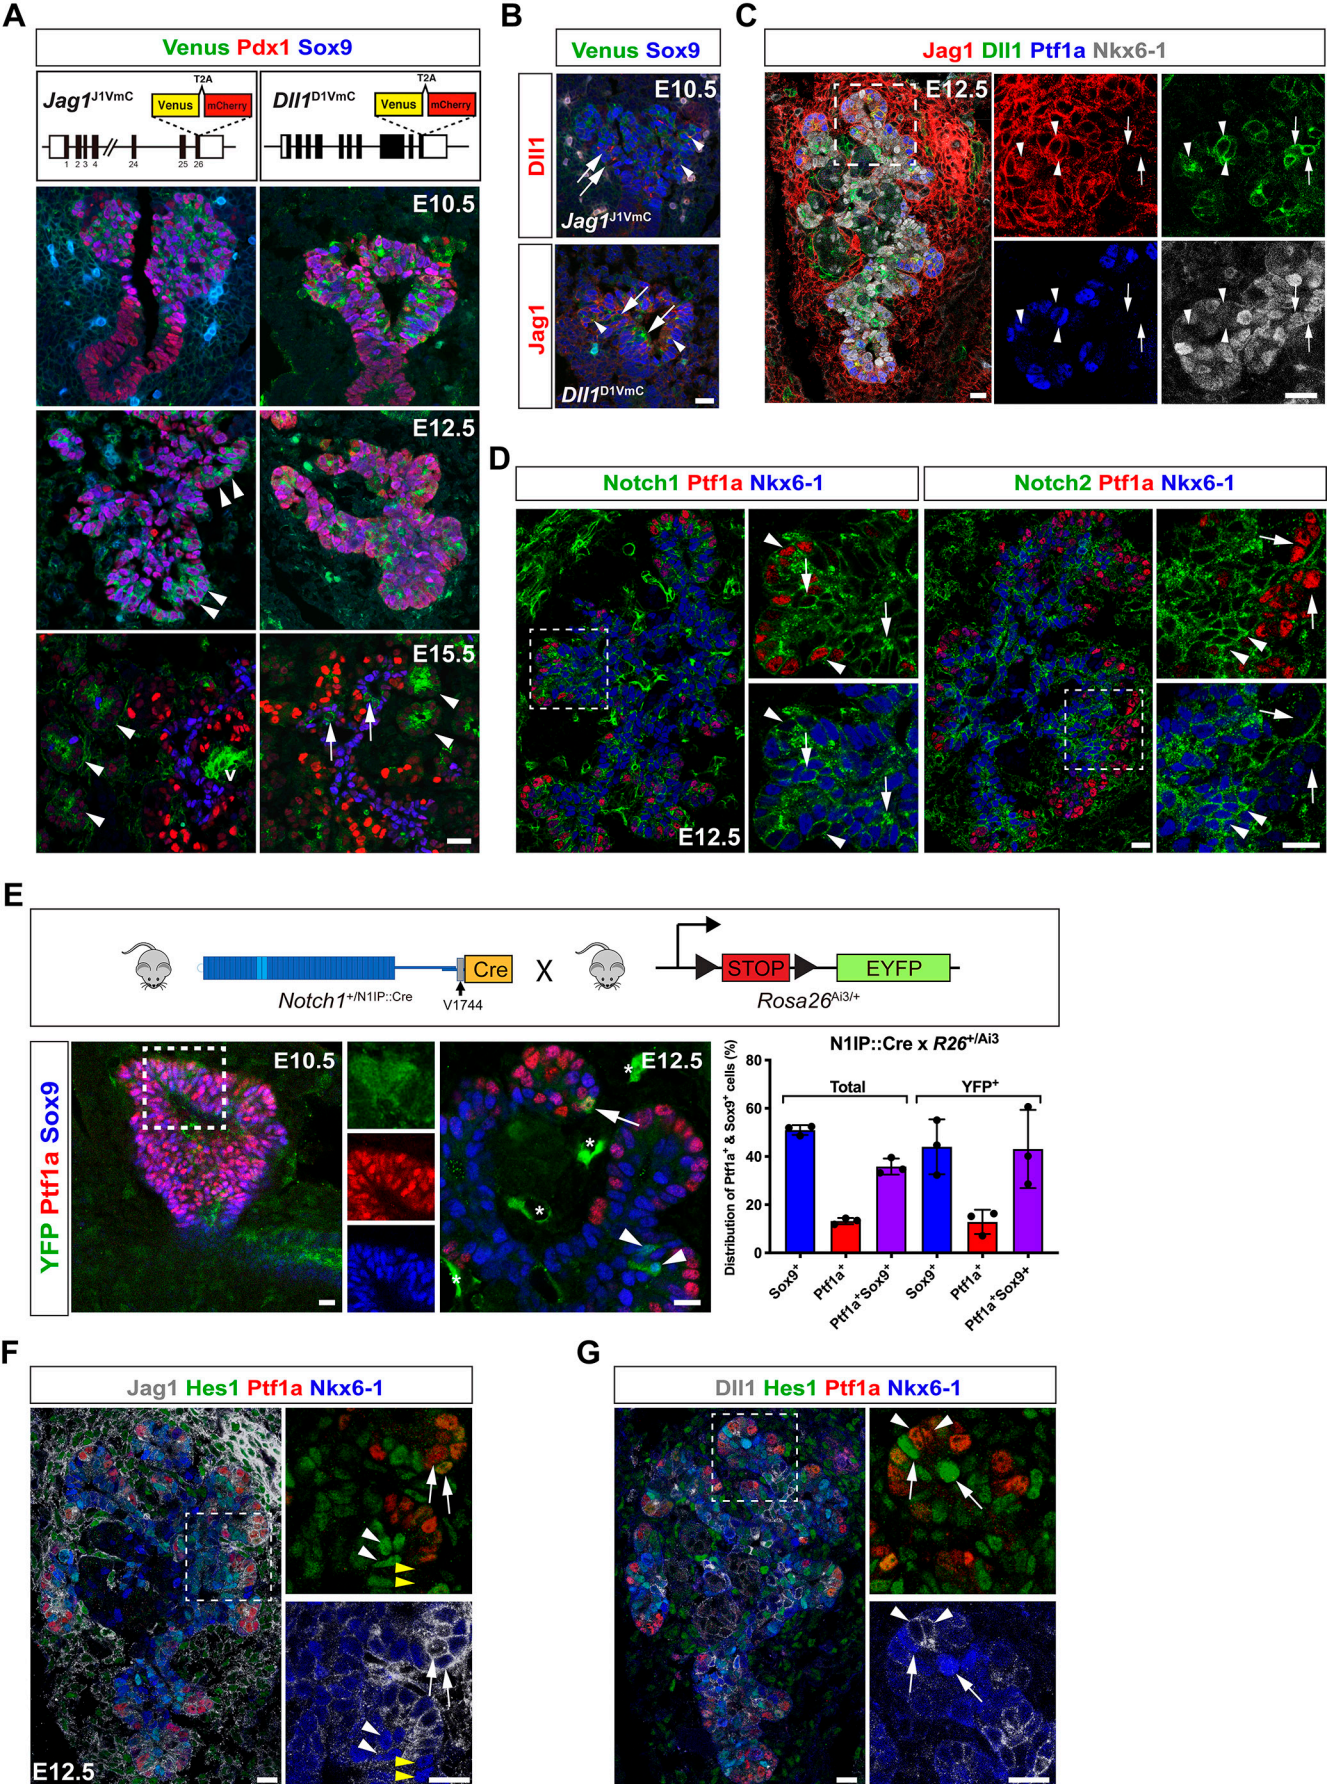

Figure 1

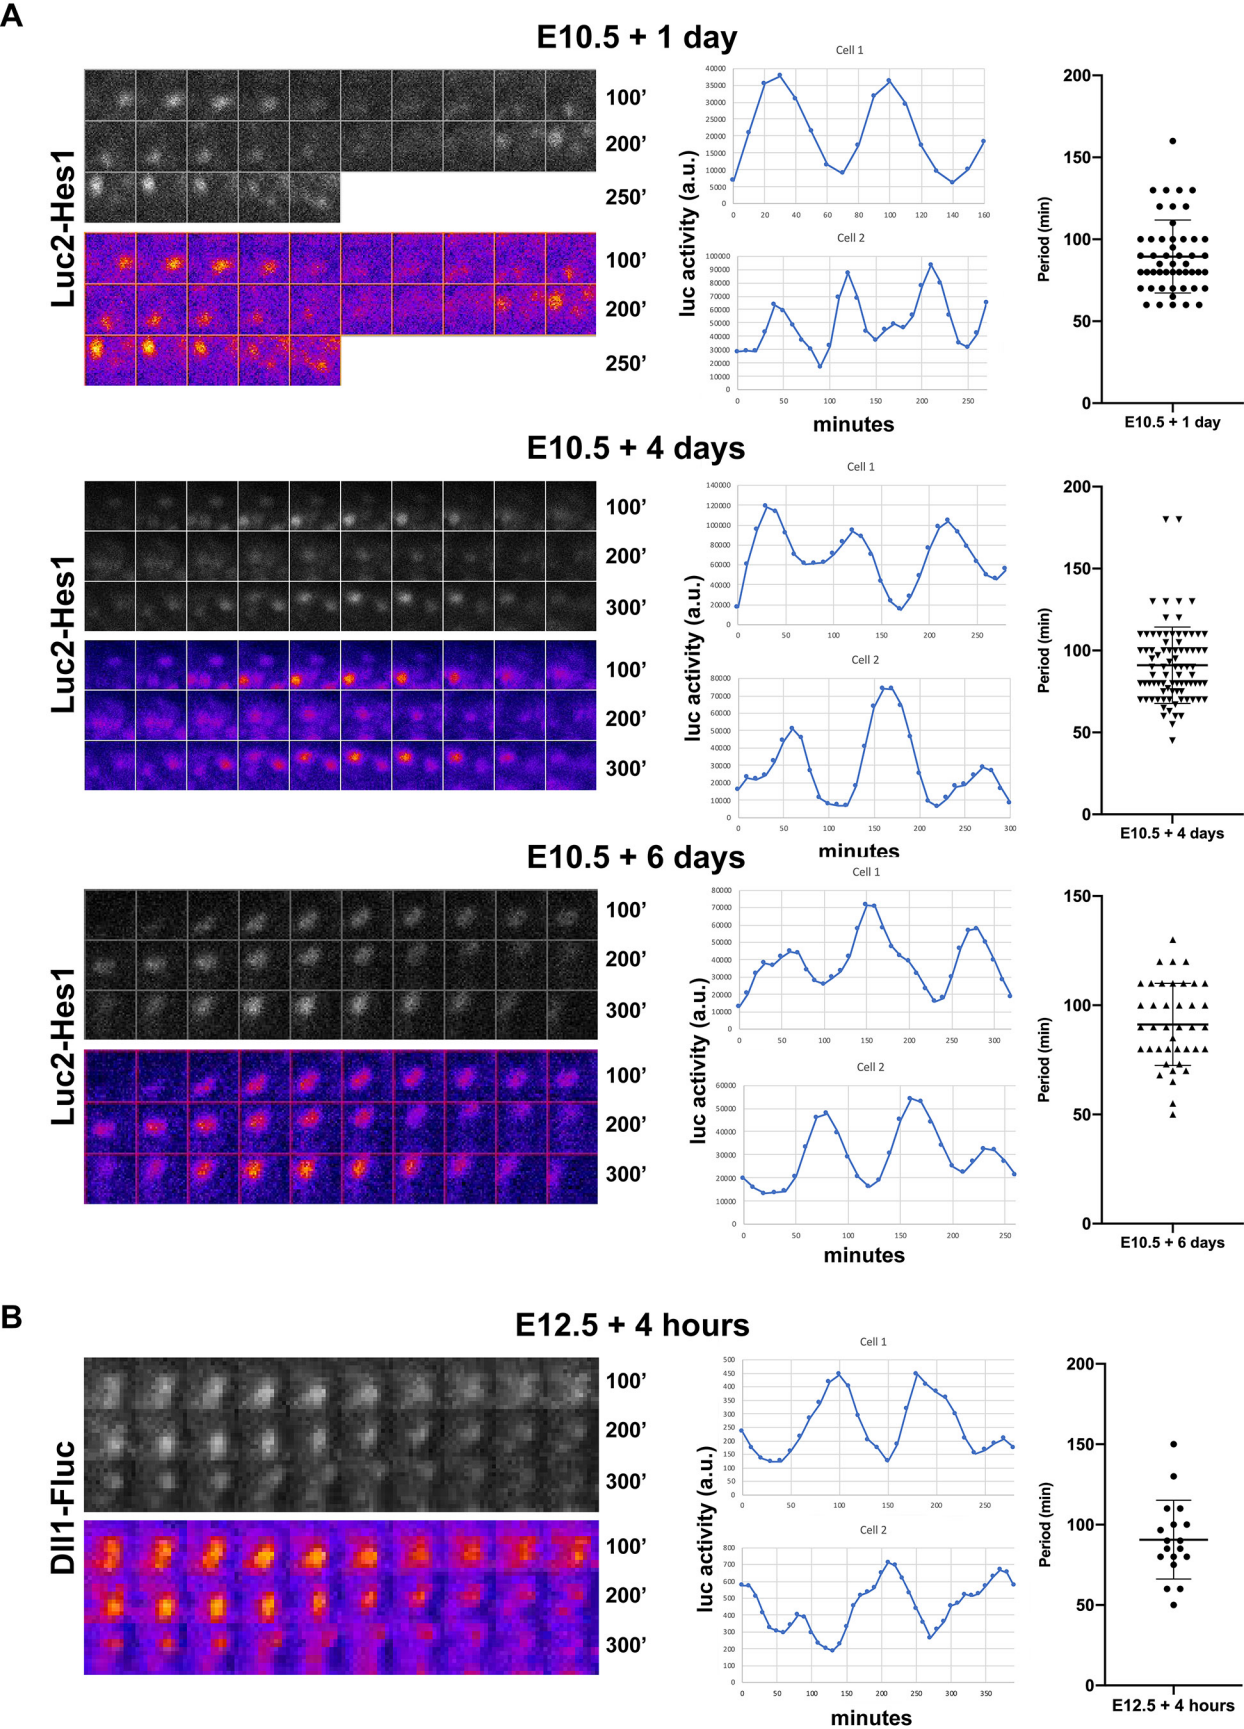

**Figure 2**

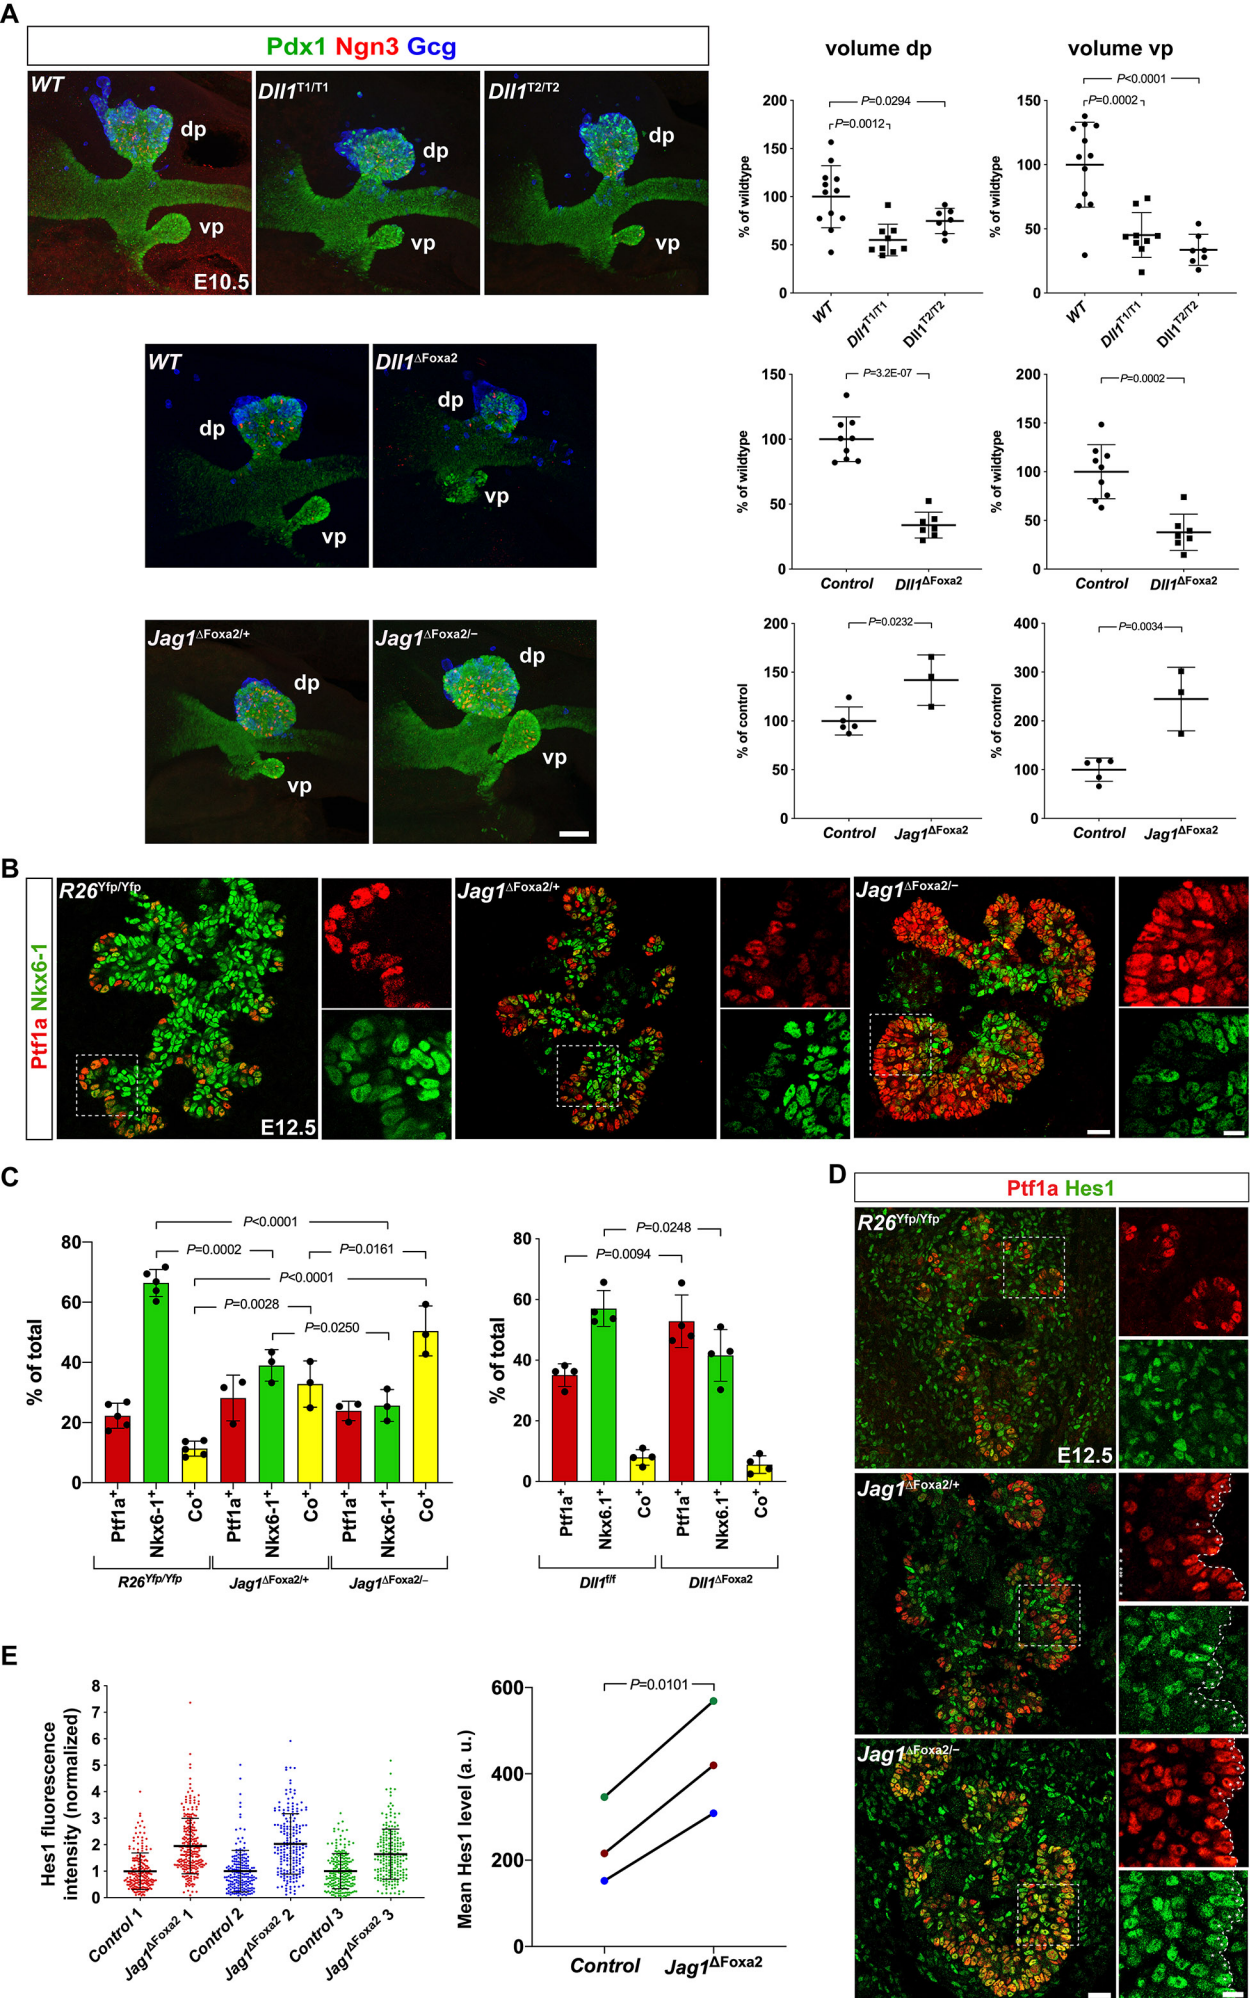

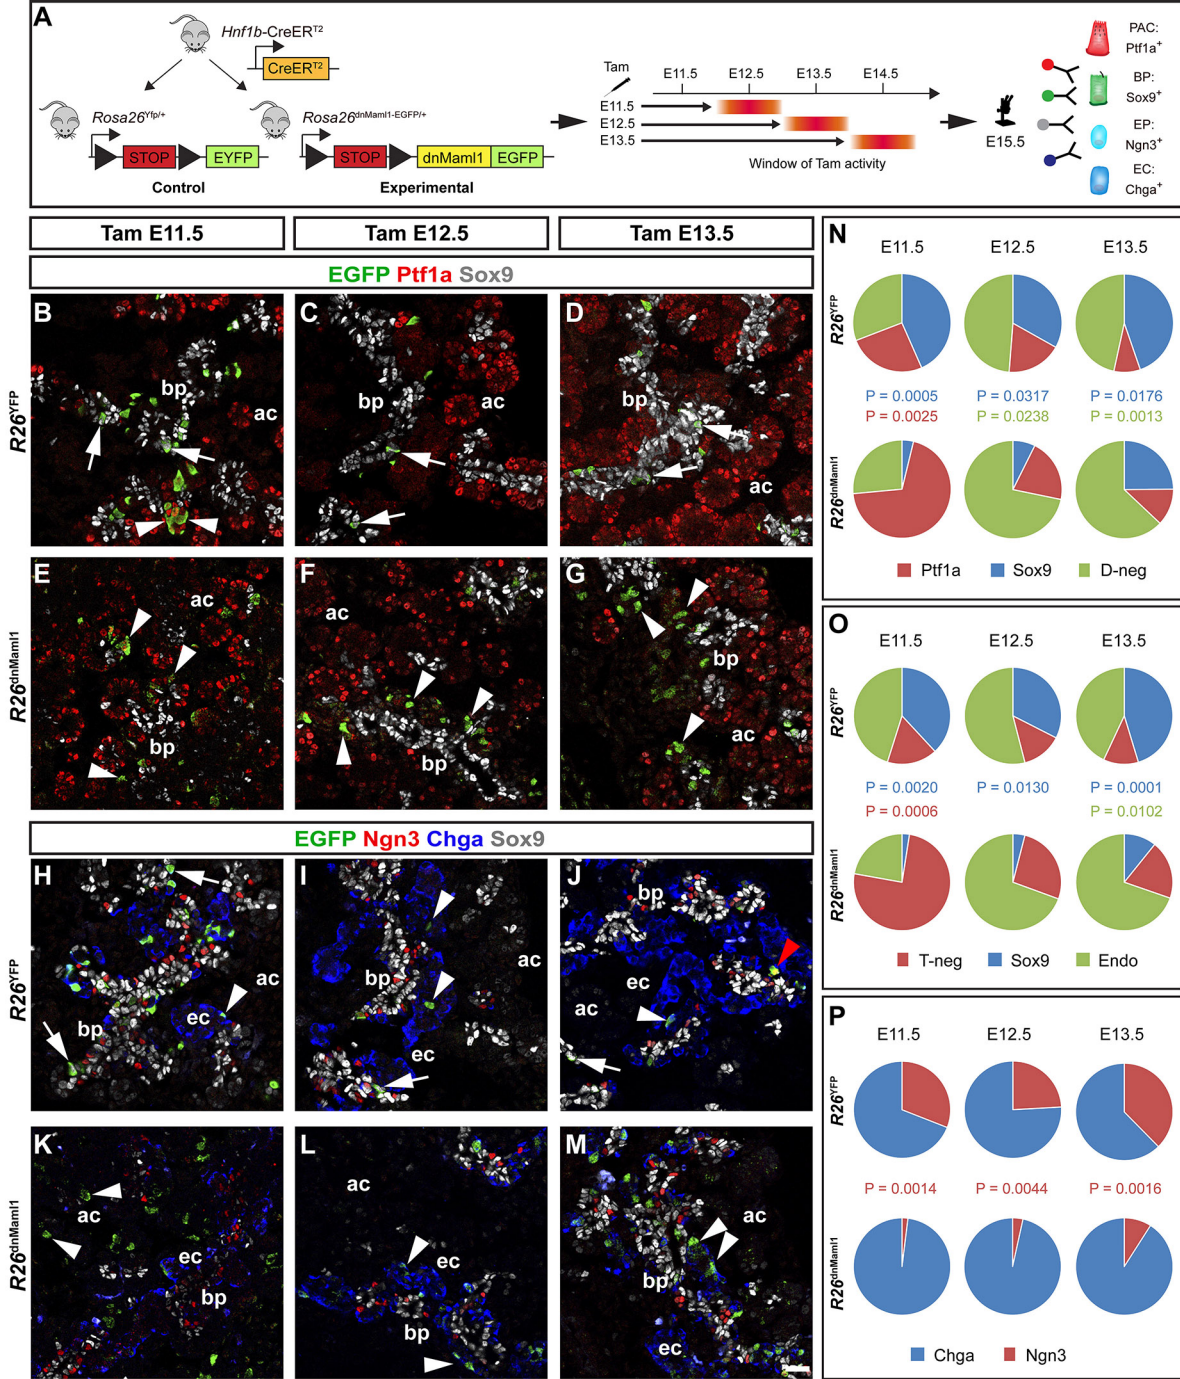



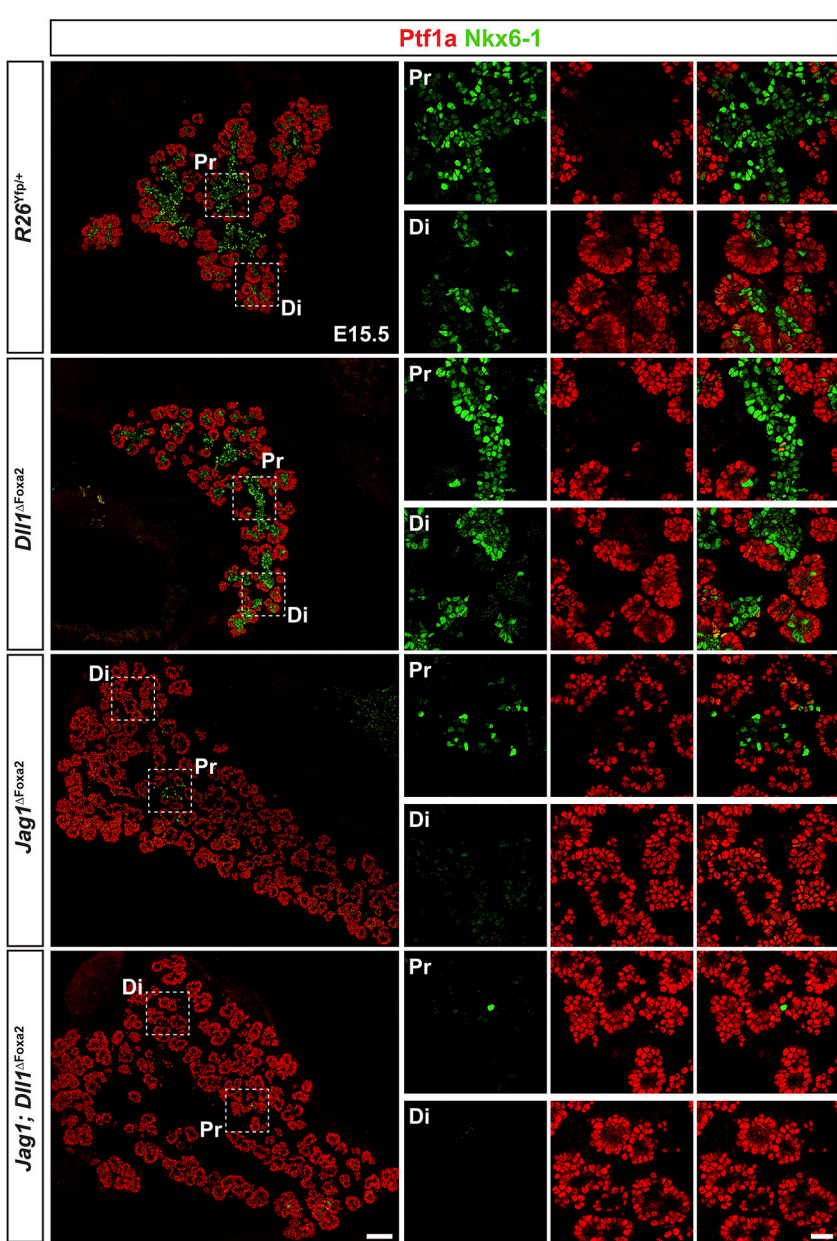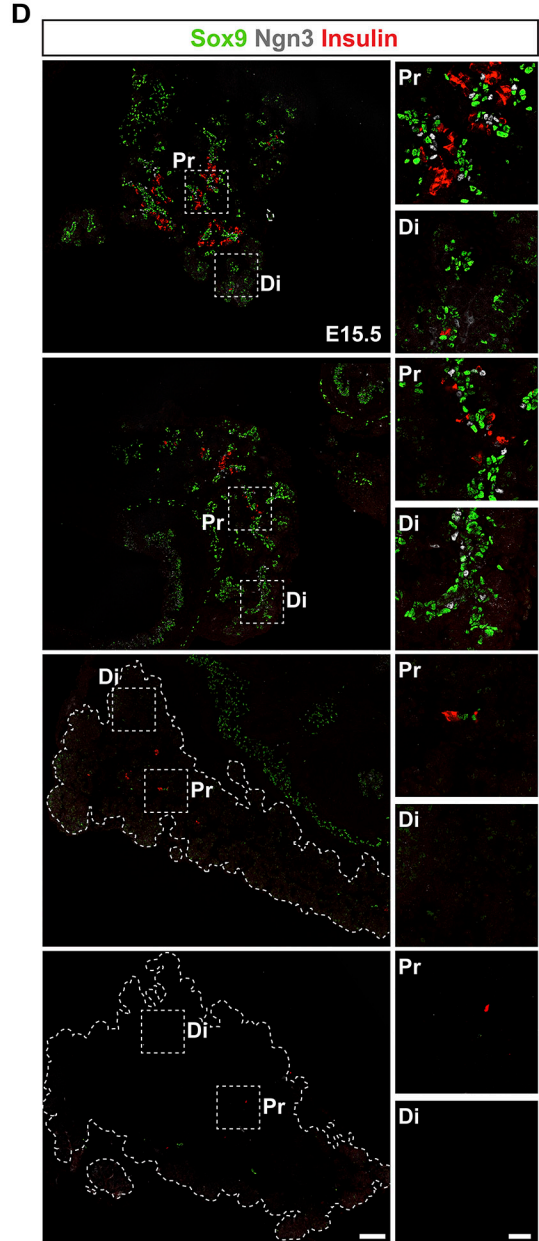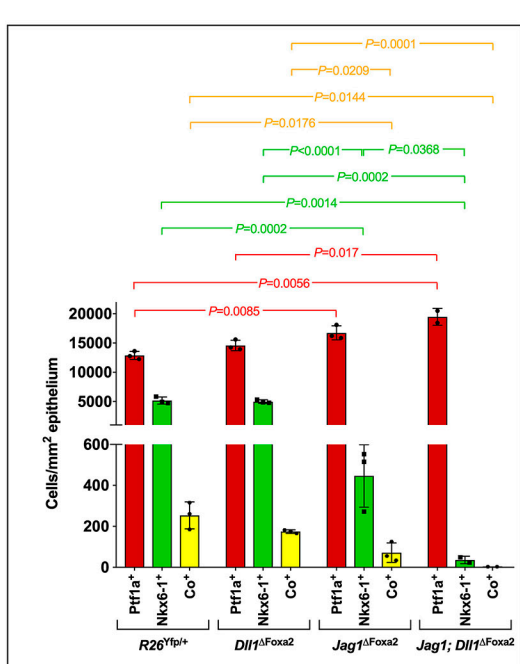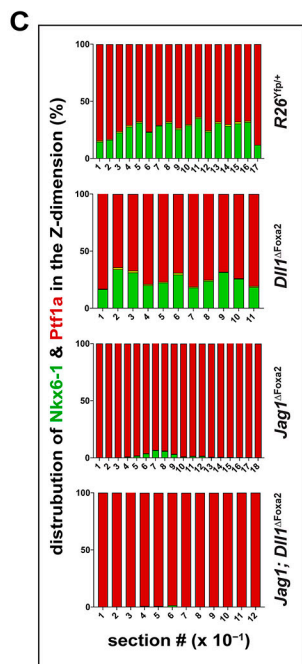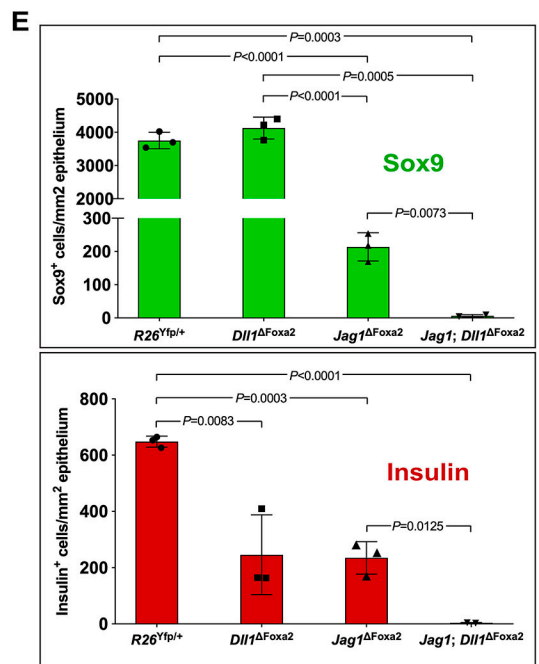

**Figure 5**

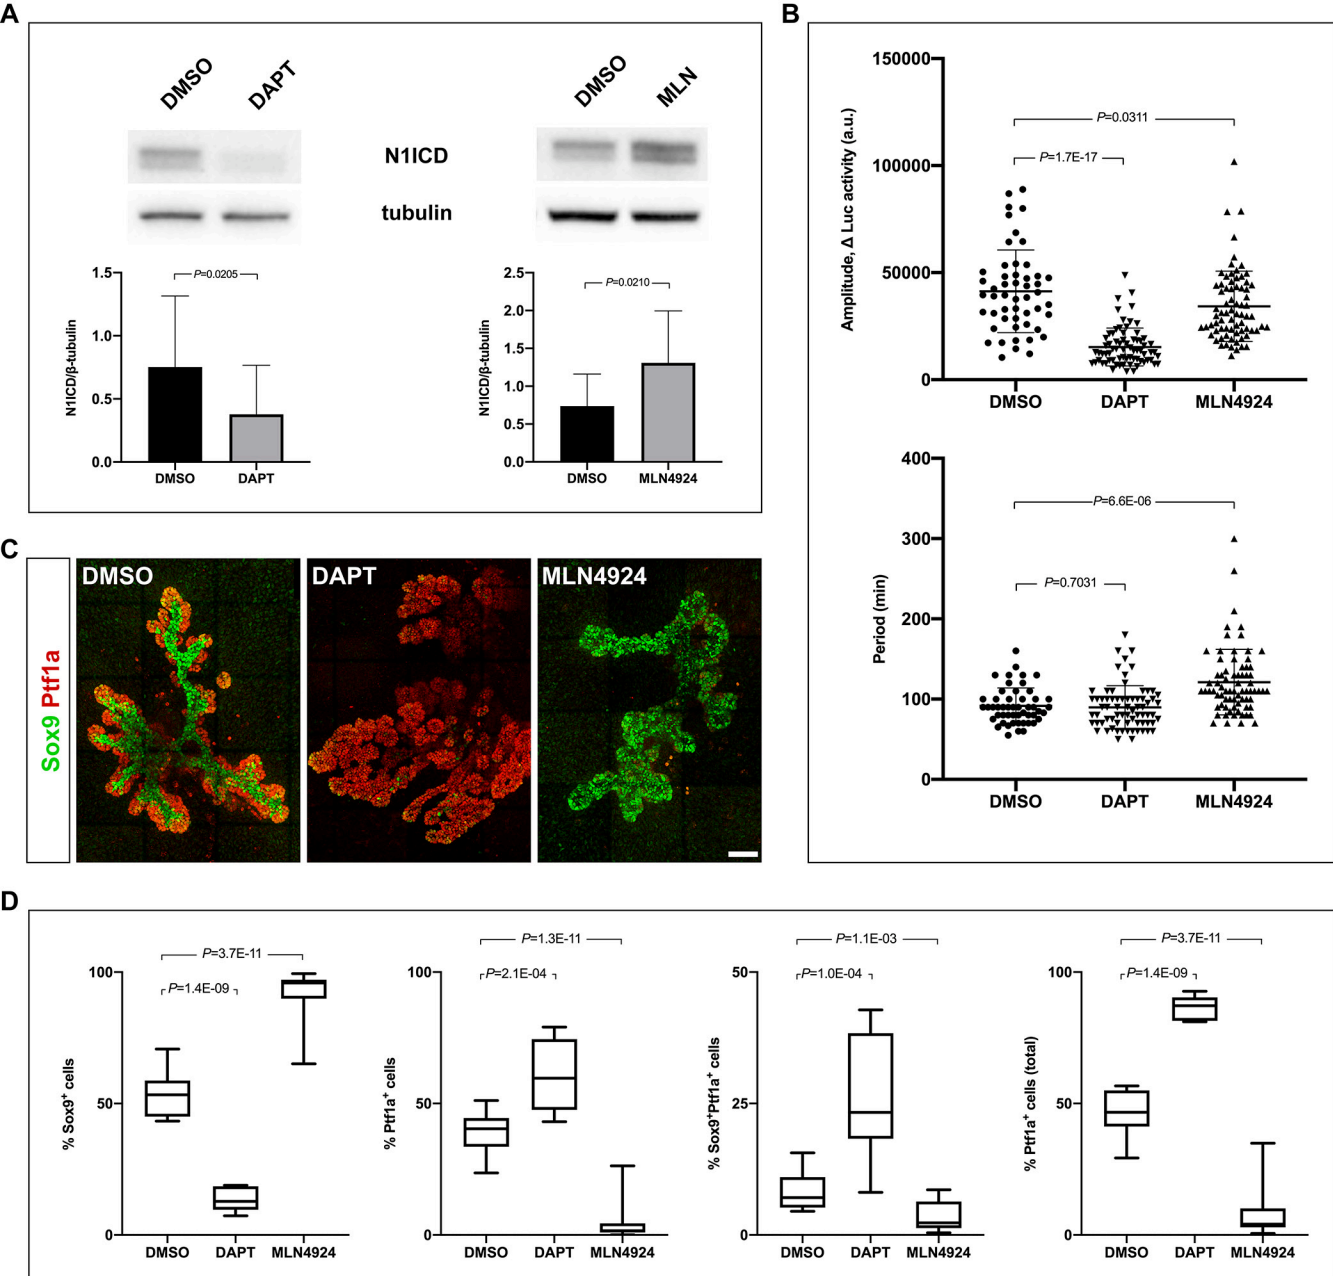

**Figure 6**

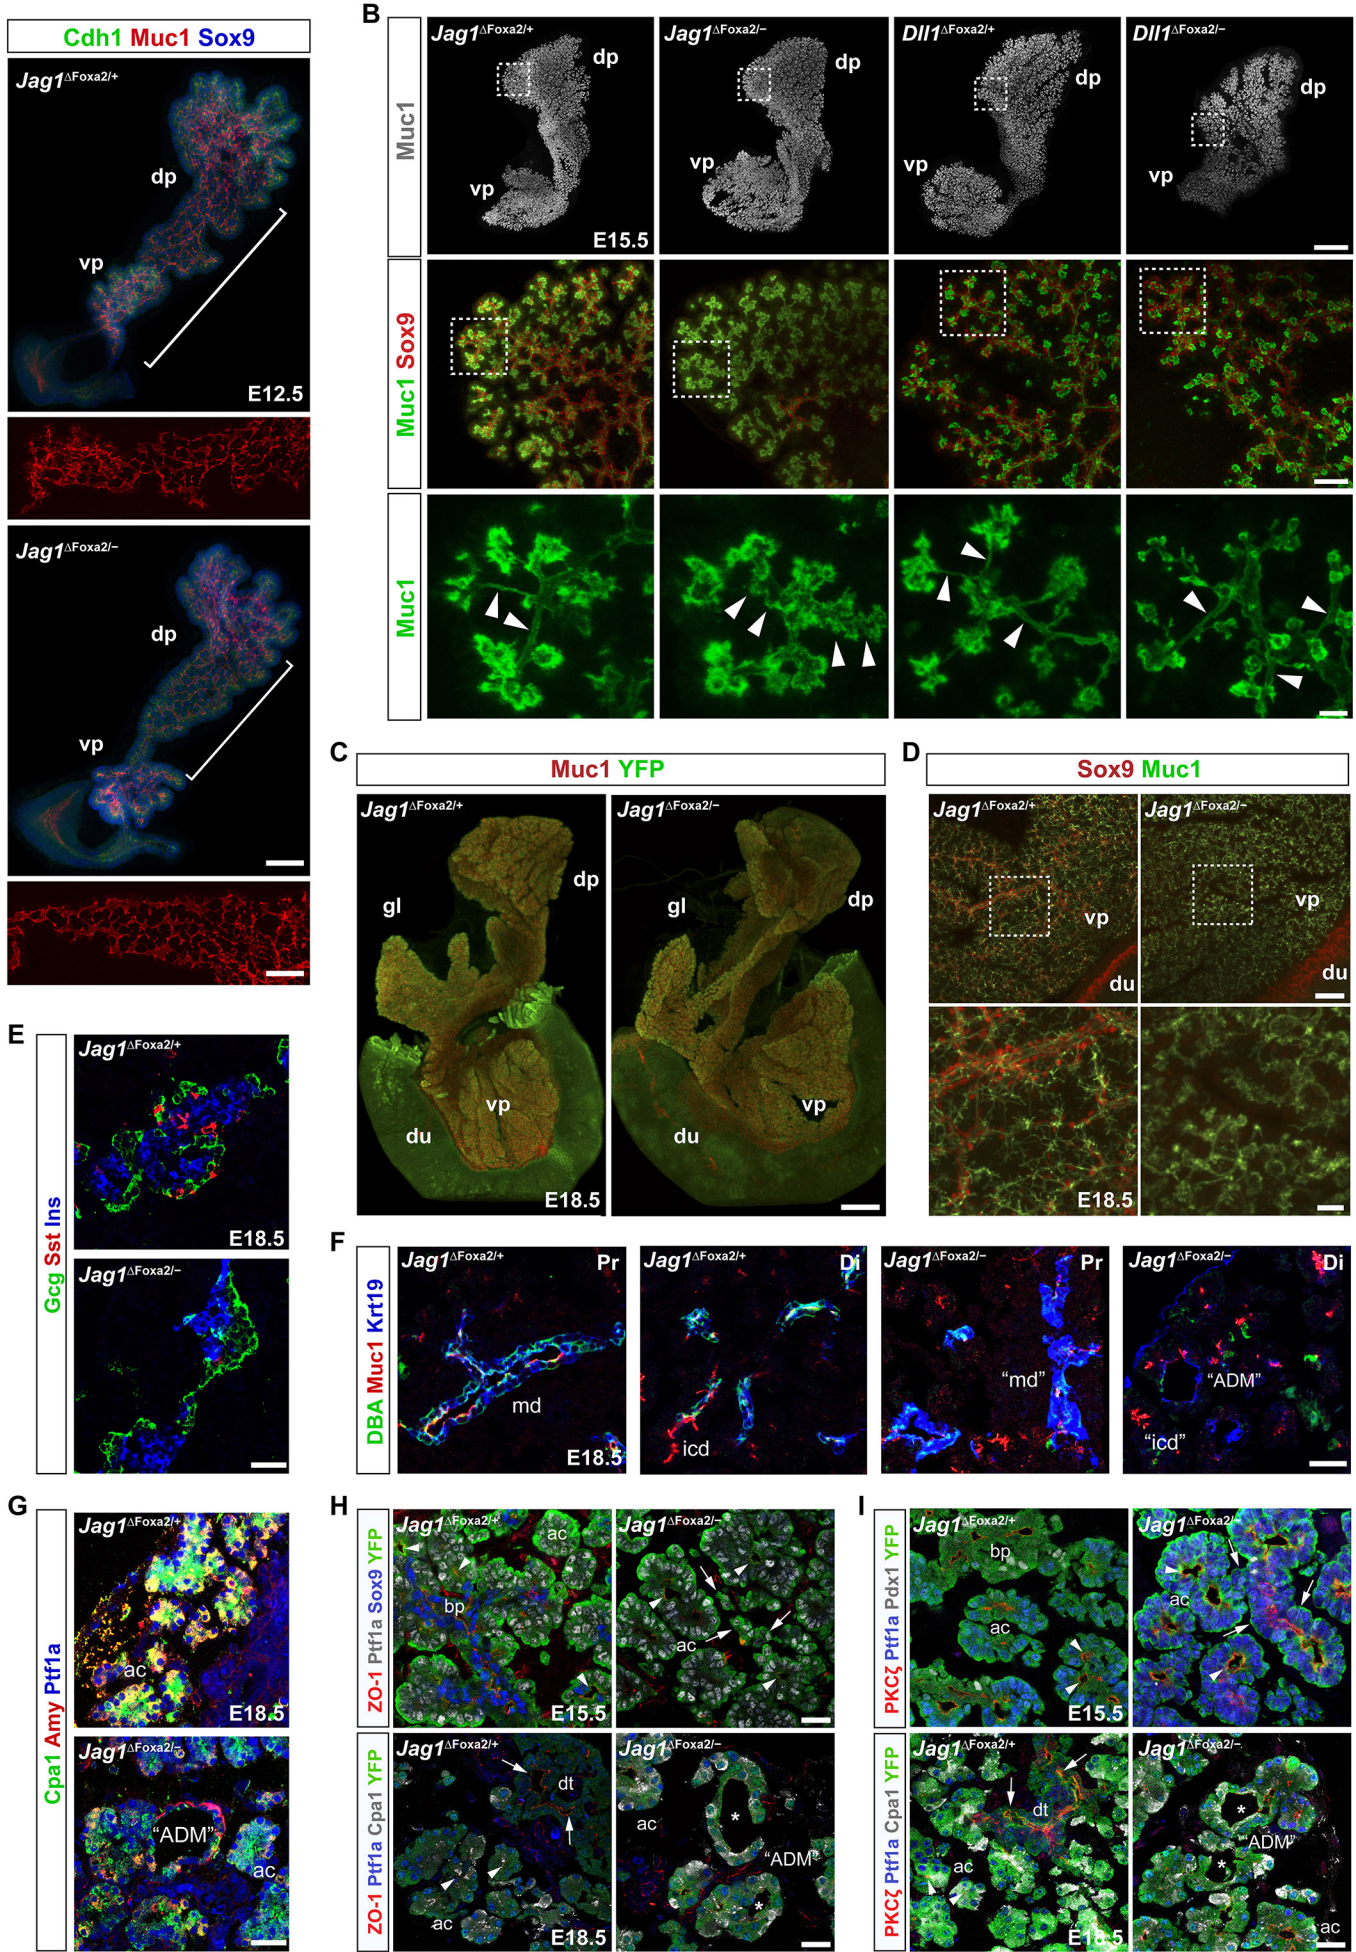

Figure 7
