# Supplementary material for: Jag1 modulates an oscillatory Dll1-Notch-Hes1 signaling module to coordinate growth and fate of pancreatic progenitors
Source: bioRxiv or medRxiv preprint supplement (doi:10.1101/336529), 2019-06-26

**Supplemental Figure 1. Substitution of *Hnf1β-CreER<sup>T2</sup>* in Pulse-Chase Analyses with *Sox9-CreER<sup>T2</sup>* Confirms that Notch-Dependent TrPC Allocation Closes by E13.** (A,B) Tamoxifen (Tam) administration to experimental mice induces *Sox9-CreER<sup>T2</sup>*-mediated expression of a dnMaml1-GFP fusion protein from the *Rosa26* locus, rendering Sox9<sup>+</sup> TrPC-biased MPCs and their progeny permanently Notch-insensitive and GFP-labeled (A) while in control embryos, the same cell population is YFP-labeled but remains Notch signaling-intact following tamoxifen-induced *Sox9-CreER<sup>T2</sup>*-mediated recombination of the *Rosa26<sup>YFP</sup>* reporter (B). (C) Approximate temporal windows of Tam activity resulting from single intraperitoneal (i.p.) injections at E11.5, E12.5 or E13.5: pancreata were analysed at E15.5 whereupon cell fate of labeled TrPCs and their progeny was assessed on the basis of marker expression (D). *Sox9-CreER<sup>T2</sup>*-mediated recombination efficiency for both *Rosa26<sup>dnMaml1-eGFP</sup>* and *Rosa26<sup>YFP</sup>* alleles is of an order of magnitude greater than that achieved with *Hnf1β-CreER<sup>T2</sup>* (E-P). Qualitatively, cell fate distributions of control YFP<sup>+</sup> cells in E15.5 *Sox9-CreER<sup>T2</sup>; Rosa26<sup>YFP</sup>* and Notch-insensitive dnMaml1-GFP<sup>+</sup> cells in *Sox9-CreER<sup>T2</sup>; Rosa26<sup>dnMaml1-eGFP</sup>* pancreata following E11.5, E12.5 or E13.5 Tam i.p. mirror those seen using *Hnf1β-CreER<sup>T2</sup>*. While after an E11.5 Tam i.p., YFP<sup>+</sup> cells in control *Sox9-CreER<sup>T2</sup>; Rosa26<sup>YFP</sup>* pancreata can be found to express markers of all three compartments (E,G), by an E13.5 Tam i.p., YFP<sup>+</sup> cells are predominantly Sox9<sup>+</sup> or endocrine (Ngn3<sup>+</sup> or ChrA<sup>+</sup>) (I,K,M,O). Following Tam i.p. at E11.5, dnMaml1-GFP<sup>+</sup> cells in *Sox9-CreER<sup>T2</sup>; Rosa26<sup>dnMaml1-GFP</sup>* pancreata are predominantly Sox9<sup>-</sup> Ptf1a<sup>+</sup> with a proportion expressing endocrine markers (Ngn3, Chr-A) (F,H). Tam i.p. at E12.5 or E13.5 similarly results in the vast majority of dnMaml1-GFP<sup>+</sup> cells being Sox9<sup>-</sup> although in contrast to the principally acinar labeling following E11.5 Tam i.p., dnMaml1-GFP<sup>+</sup> cells following E12.5 or E13.5 Tam i.p. are predominantly endocrine (Chr-A<sup>+</sup>) with a smaller proportion expressing Ptf1a (J,L,N,P). Scale bar = 50 μm.

**Supplemental Figure 2. Validation of Specificity of Anti-Dll1, -Jag1 and -Hes1 Antisera.** Rabbit monoclonal anti-Jag1 antibody (Cell Signaling Technology: 2620) gives membraneous signal on cells in the neural tube and weaker but specific membraneous staining throughout both pancreatic buds in E10.5 control mice (A,A'') but not *Jag1<sup>-/-</sup>* littermates (B,B''). Similarly, goat anti-Jag1 antibody (Santa Cruz Biotechnology: sc-6011) gives membraneous signal on cells in the neural tube and weaker but specific membraneous staining throughout both pancreatic buds in E10.5 control

embryos (**C,C''**) but not *Jag1*<sup>-/-</sup> littermates (**D,D''**). Note that adjacent sections are shown in **A-D''**: Jag1 is detected in the same cell populations using both antisera although the goat antibody yields stronger signal. Sheep anti-Dll1 antibody (R&D Systems: AF3970) yields heterogeneous membraneous signal on cells in the neural tube (nt), and weaker but specific signal in dorsal (dp) and ventral (vp) pancreas in E10.5 control embryos (**E,E''**), but not nullizygous *Dll1*<sup>lacZ/lacZ</sup> littermates (**F,F''**). Rabbit monoclonal anti-Hes1 antibody (Cell Signaling Technology: 11988) yields strong nuclear Hes1 signal in the neural tube and floorplate (fp) and throughout both pancreatic buds in E10.25 control embryos (**G,G''**) but not *Hes1*<sup>-/-</sup> littermates (**H,H''**). Sox9 signal is shown for reference. Pancreatic buds are demarcated by white dashed lines in **A'',B'',C'',D'',E'',F'',G'',H''**. Images of Sox9, ligand or Hes1 signal within each antibody combination were captured at the same exposure and processed equivalently except for inset panels for Dll1 (**E'',F''**) or Jag1 (**A'',B''**) in which weaker signal in pancreatic buds compared to neural tube is enhanced to show pancreas-specific signal (parallel enhancement performed for control and nullizygous images). duo, duodenum; cbd, common bile duct. Scale bar = 50  $\mu$ m.

### **Supplemental Figure 3. Cell-Specific Expression of Jag1 and Dll1 in the Developing Pancreas.**

Sections of an E15.5 *Jag1*<sup>J1V<sup>mc</sup></sup> embryo stained for Venus (Jag1-Venus) and Sox9 (**A**) or mCherry (Jag1-mCherry), GFP (from Hes1-eGFP) and Sox9 (**C**) and sections of an E15.5 (or E12.5, **E**) *Dll1*<sup>D1V<sup>mc</sup></sup> embryo stained for Venus (Dll1-Venus) and Sox9 (**B**) or mCherry (Dll1-mCherry) and Sox9 with either GFP (Hes1-eGFP) (**D**) or Jag1 (**E,F**). Sections of E12.5 (**G-I**) or E15.5 (**J-L**) pancreata stained for Jag1, Pecam and E-Cadherin (**G,J**), Jag1, Ngn3 and glucagon with insulin (**H,K**) or Jag1, Ptf1a, and Sox9 (**I,L**). Sections of E12.5 (**M-O**) or E15.5 (**P-R**) pancreata stained for Dll1, Pecam and E-Cadherin (**M,P**), Dll1, Ngn3 and glucagon with insulin (**N,Q**) or Dll1, Ptf1a, and Sox9 (**O,R**).

### **Supplemental Figure 4. PD Patterning is Perturbed Following Mosaic Endodermal Deletion of Jag1 and Dll1.**

(**A-D'**) IF on sections of E12.5 embryos of the indicated genotypes for Ptf1a, Nkx6.1, YFP and E-Cadherin. (**E-G**) Scatter plots showing quantifications of the number of Ptf1a<sup>+</sup> (Ptf1a<sup>+</sup> Nkx6.1<sup>-</sup>) TiPCs (**E**), Nkx6.1<sup>+</sup> (Ptf1a<sup>-</sup> Nkx6.1<sup>+</sup>) TrPCs (**F**) and Ptf1a<sup>+</sup> Nkx6.1<sup>+</sup> cells (**G**) relative to the number of progenitor cells (the total number of Ptf1a<sup>+</sup> and/or Nkx6.1<sup>+</sup> cells) in dorsal pancreata. Data are

presented as mean  $\pm$  S.E.M. *P*-values are indicated on the plots. Genotypes are abbreviated in scatter plots by the first letter (D = Dll or J = Jag) of the ligand gene(s) deleted by *Sox17*<sup>CreERT2</sup>.

**Supplemental Figure 5. Resolution of PD Patterning is Delayed by Two Days in the *Jag1* <sup>$\Delta$ Foxa2</sup> Pancreas.** IF for Ptf1a and either Nkx6.1 (A,B,G,H) or Sox9 (C,D,I,J) shows that while Ptf1a expression is maintained proximally in the *Jag1* <sup>$\Delta$ Foxa2</sup> pancreas at E13.5 (B,D) compared to controls (A,C), Ptf1a and Nkx6.1 expression domains have resolved by E14.5 in the mutant with loss of the distal-most Nkx6.1<sup>+</sup> (H, inset) and Sox9<sup>+</sup> (J, inset) TrPC-derived duct cells. Presence of insulin<sup>+</sup>  $\beta$ -cells and Ngn3<sup>+</sup> endocrine precursors is ostensibly unaffected in E13.5 (F) or E14.5 (L) *Jag1* <sup>$\Delta$ Foxa2</sup> pancreata relative to control E13.5 (E) or E14.5 (K) littermates.

**Supplemental Figure 6. Apicobasal Polarity is Retained in E15.5 *Jag1* <sup>$\Delta$ Foxa2</sup> Acini But Lost Prior to Birth.** IF for ZO-1 shows it to be maintained apically on Ptf1a<sup>+</sup> acinar and Sox9<sup>+</sup> duct cells in the E15.5 *Jag1* <sup>$\Delta$ Foxa2</sup> (B-C') as control (A,A') pancreas. Similarly, IF for PKC $\zeta$  demonstrates it to be maintained apically on Ptf1a<sup>+</sup> acinar and Pdx1<sup>L0</sup> duct cells in the E15.5 *Jag1* <sup>$\Delta$ Foxa2</sup> (E-F') as control (D,D') pancreas. At E18.5 however, while apical ZO-1 is still expressed on Ptf1a<sup>+</sup> CPA1<sup>+</sup> acinar cells (as well as duct cells) in control mice (G-G'), it is downregulated in epithelial ((R26)YFP<sup>+</sup>) Ptf1a<sup>+</sup> CPA1<sup>+</sup> “ring”-like structures (asterisks) in the *Jag1* <sup>$\Delta$ Foxa2</sup> pancreas (H-I'). Likewise, PKC $\zeta$ , expressed apically on Ptf1a<sup>+</sup> CPA1<sup>+</sup> acinar cells (and duct cells) in the E18.5 control pancreas (J,J') is depleted in Ptf1a<sup>+</sup> CPA1<sup>+</sup> ring-like structures (asterisks) in the *Jag1* <sup>$\Delta$ Foxa2</sup> pancreas (K-L').

**Supplemental Figure 7. Endocrine Paucity and Acinar Dysmorphogenesis are Exacerbated with Development.** IF for insulin, glucagon and somatostatin shows a greater extent of loss of the later-arising somatostatin<sup>+</sup>  $\delta$ -cells than of either insulin<sup>+</sup>  $\beta$ -cells or glucagon<sup>+</sup>  $\alpha$ -cells in the E18.5 *Jag1* <sup>$\Delta$ Foxa2</sup> pancreas (B) compared with control littermates (A). Expression of the acinar markers amylase and CPA1 is retained in acinar cells of E18.5 *Jag1* <sup>$\Delta$ Foxa2</sup> (D) as in control (C) pancreas, including dilated “ring”-like structures although their expression is aberrantly basal (D, inset). IF for Muc1 and the ductal markers Cytokeratin 19 (CK19) and DBA reveals discontinuous, dispersed ductal structures in the E18.5 *Jag1* <sup>$\Delta$ Foxa2</sup> pancreas (F) in contrast to the extensive, continuous ductal tree of control littermates (E). The amylase<sup>+</sup> CPA1<sup>+</sup> ring-like structures also express CK19 (ring-like structure in

insets on **D** and **F** from the same region of adjacent sections). Insets are displayed with and without the YFP channel to demarcate epithelium for clarity.



Supplemental Figure 1

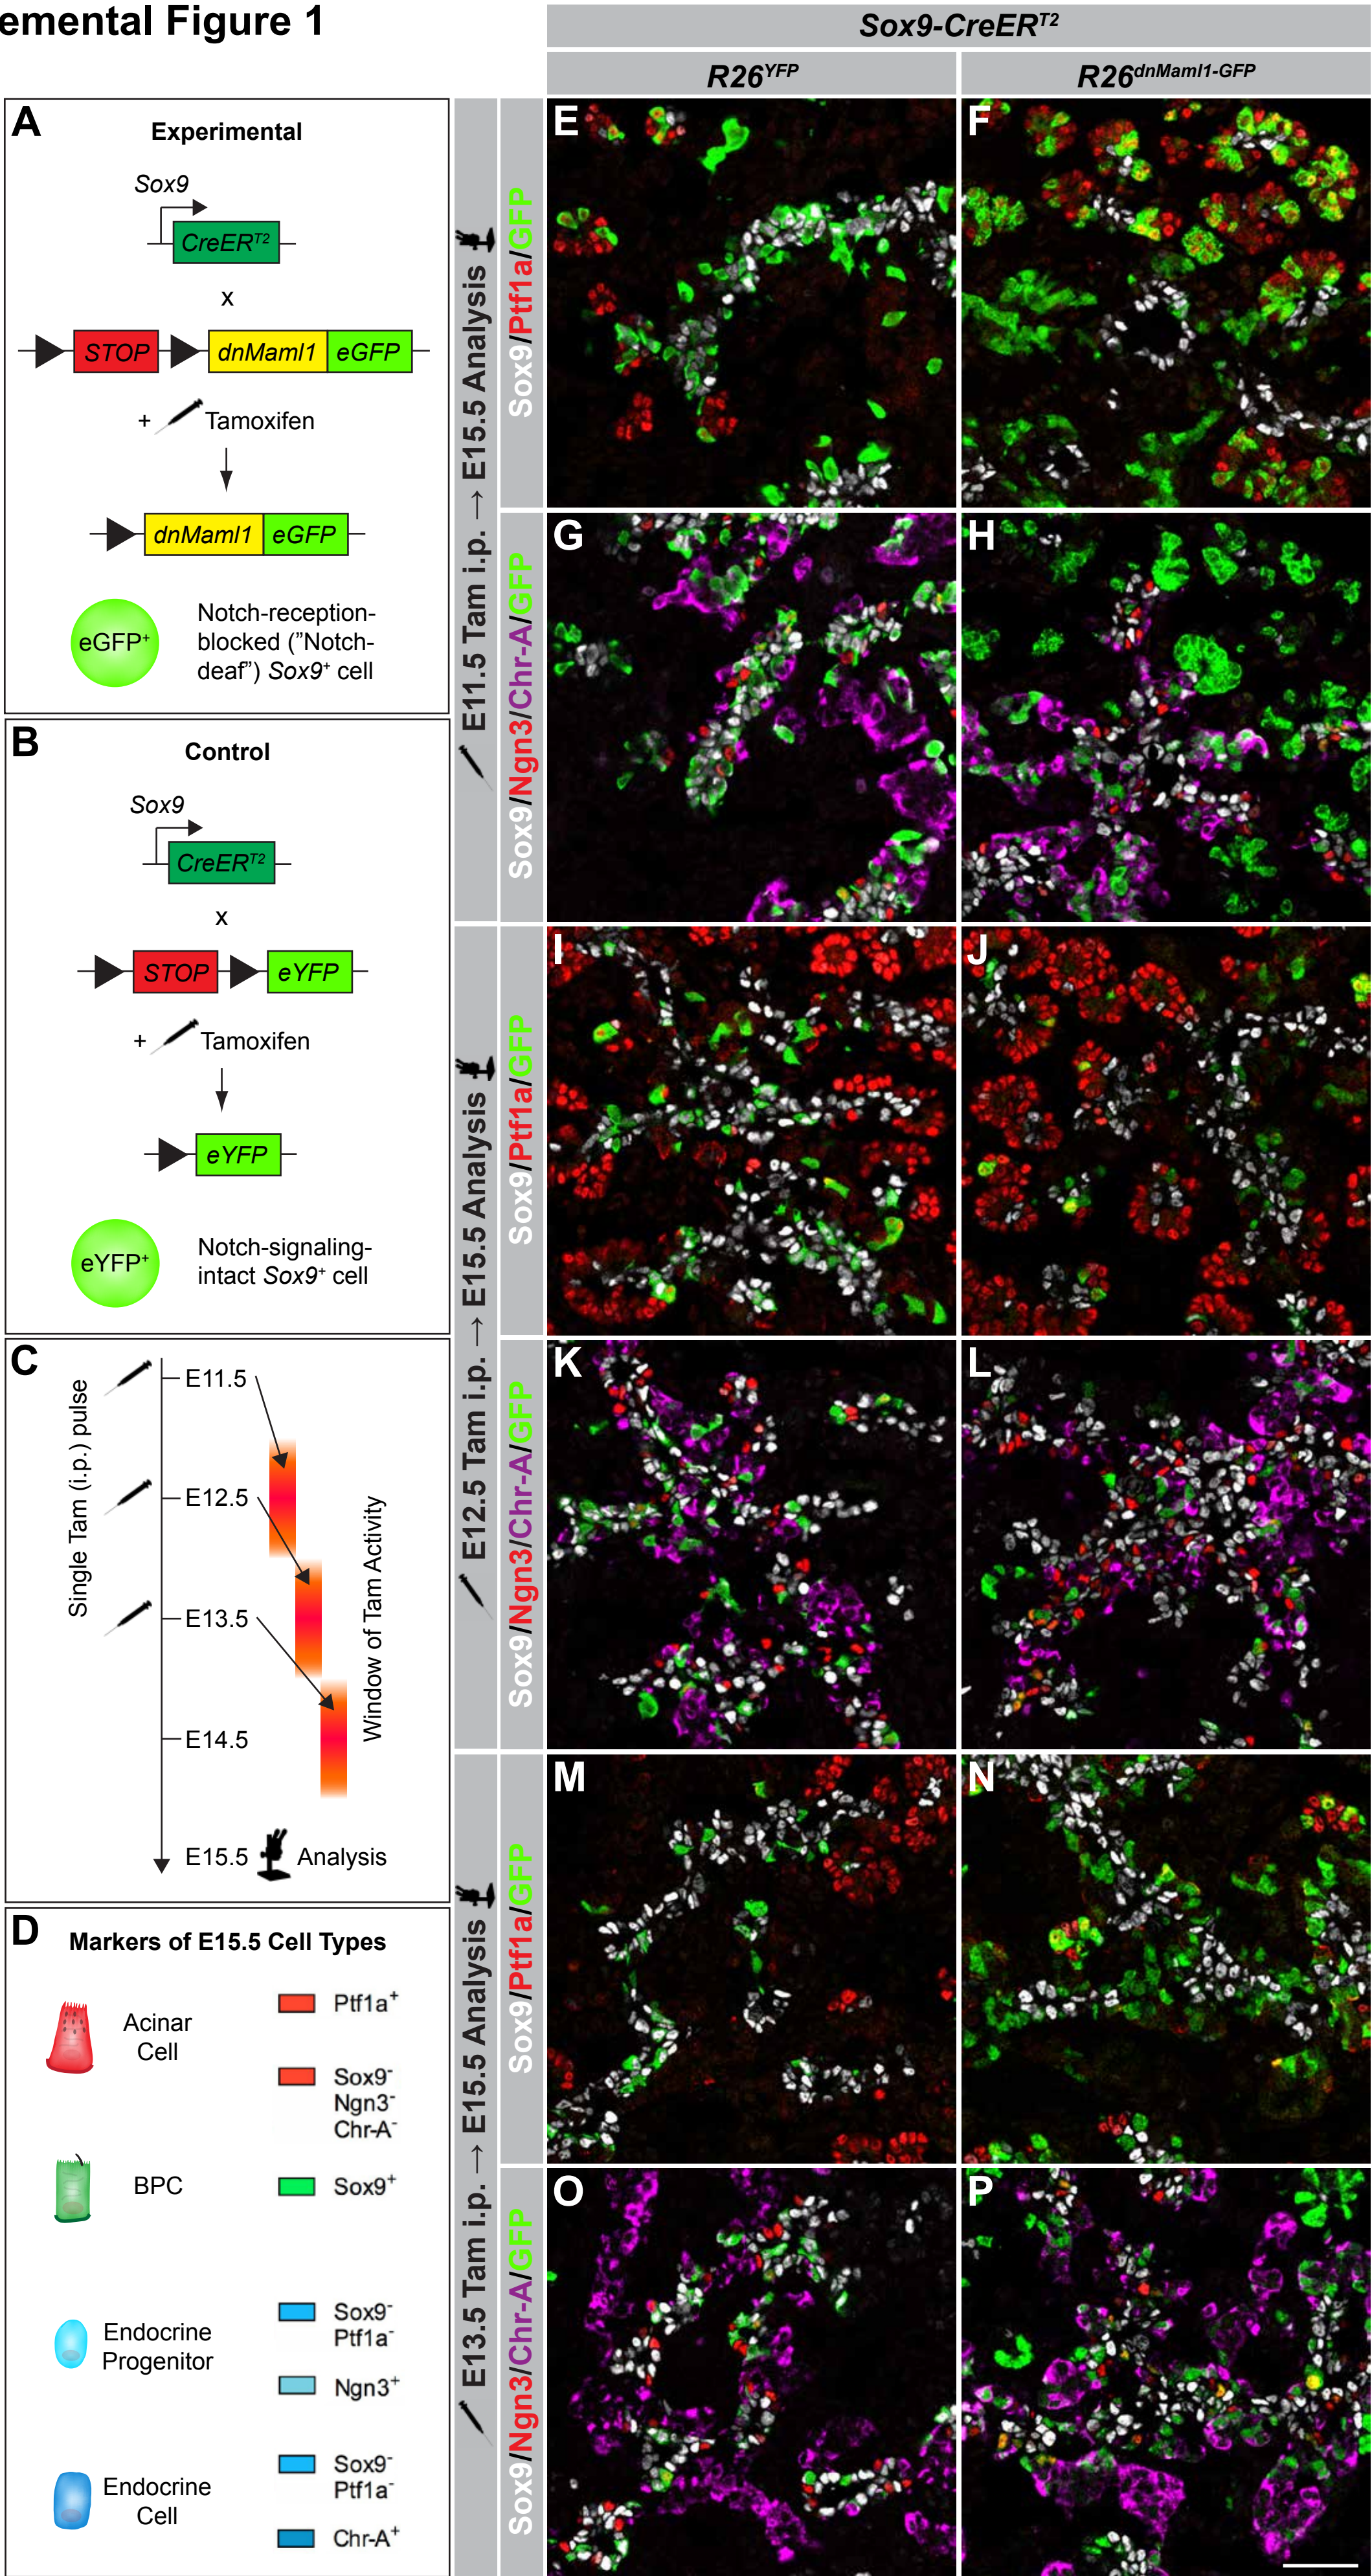



Supplemental  
Figure 2

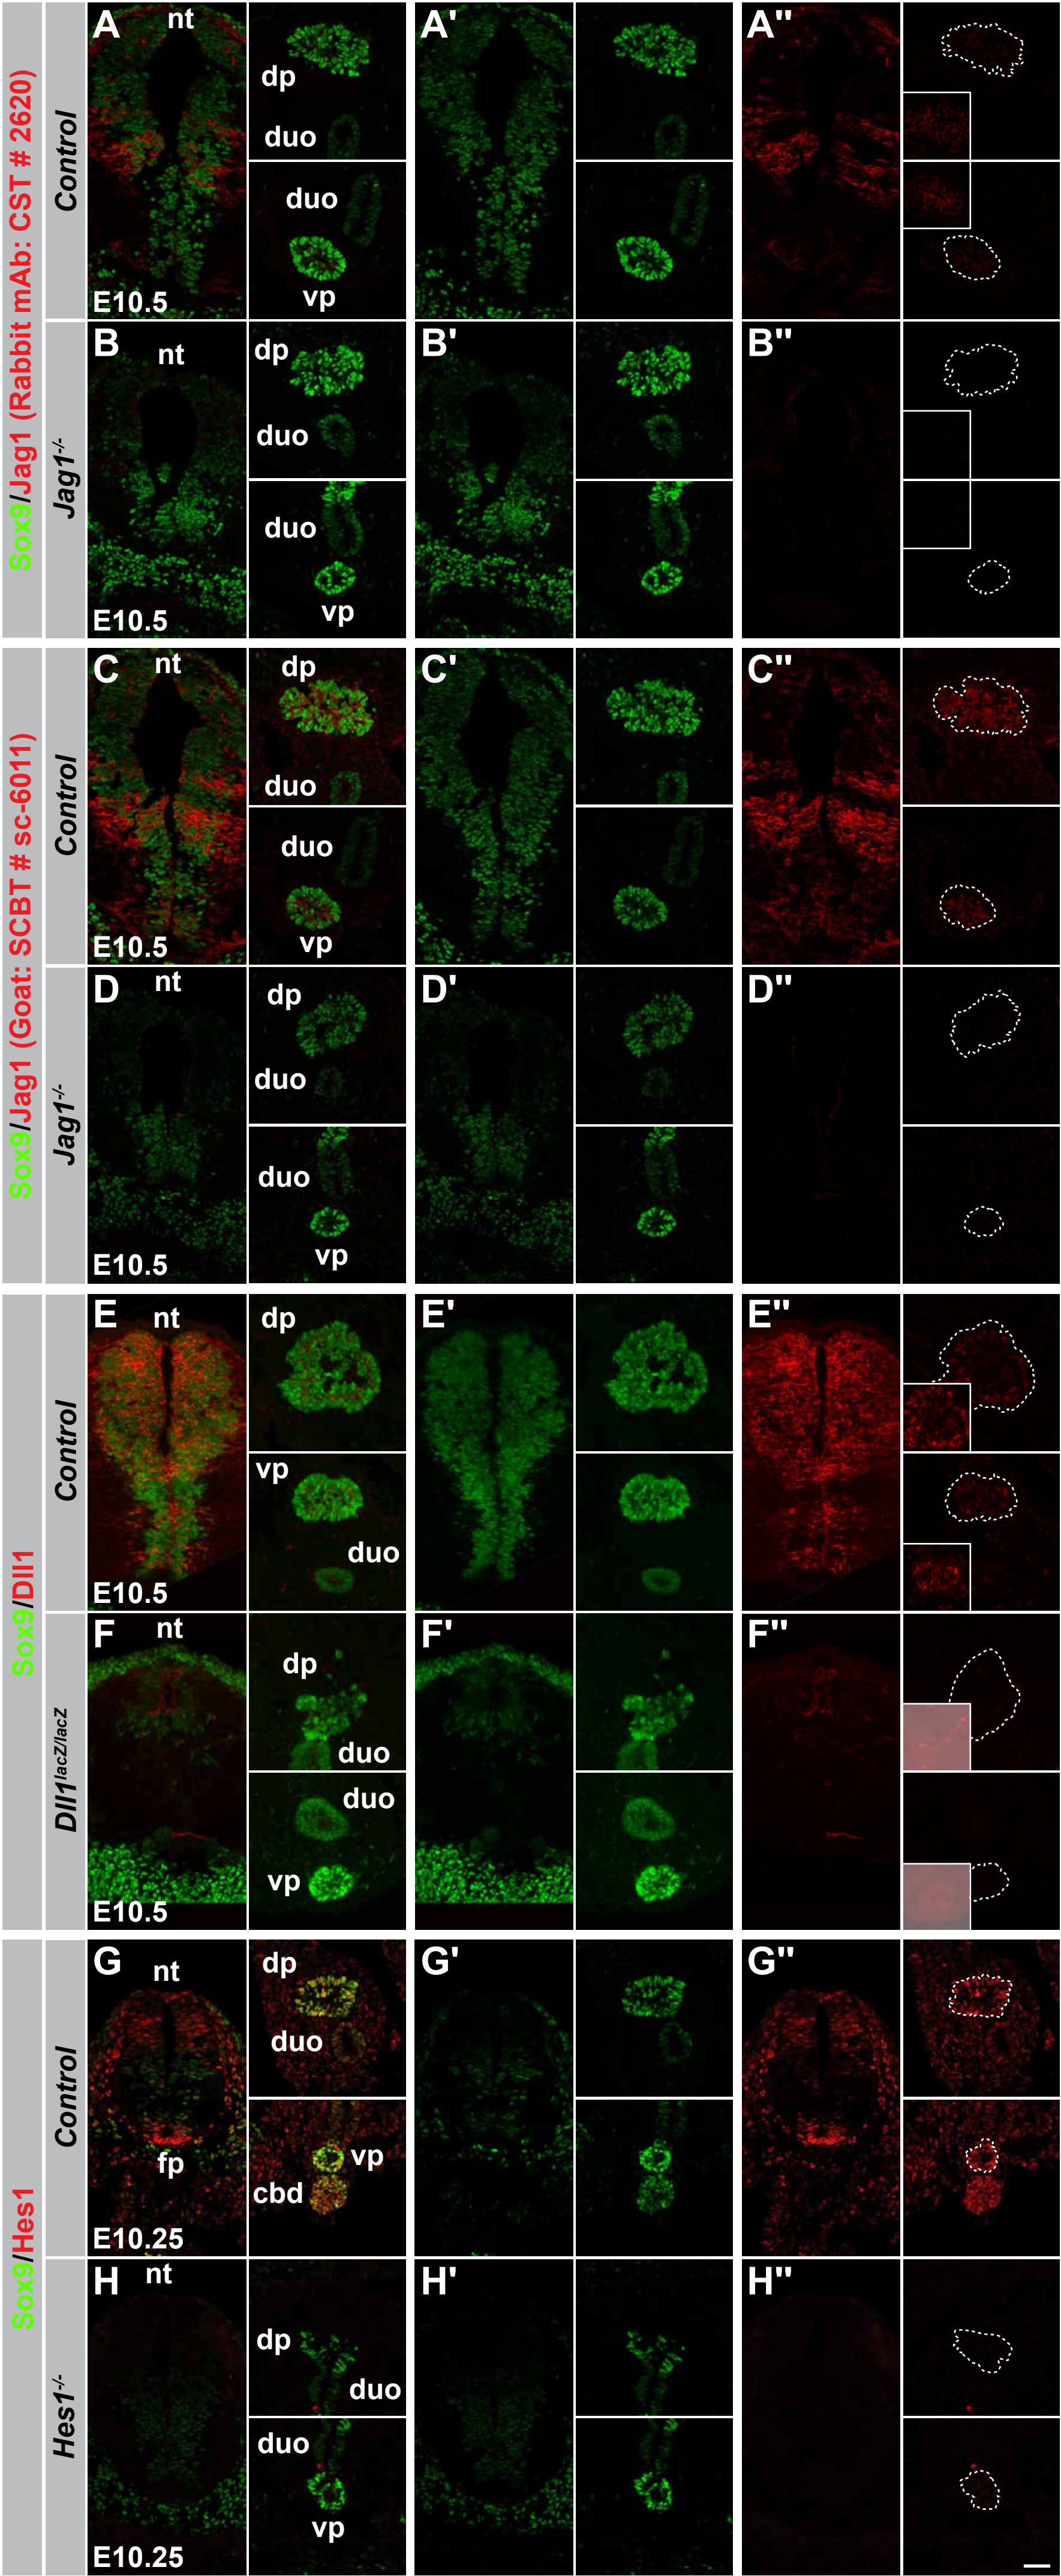



Supplemental Figure 3

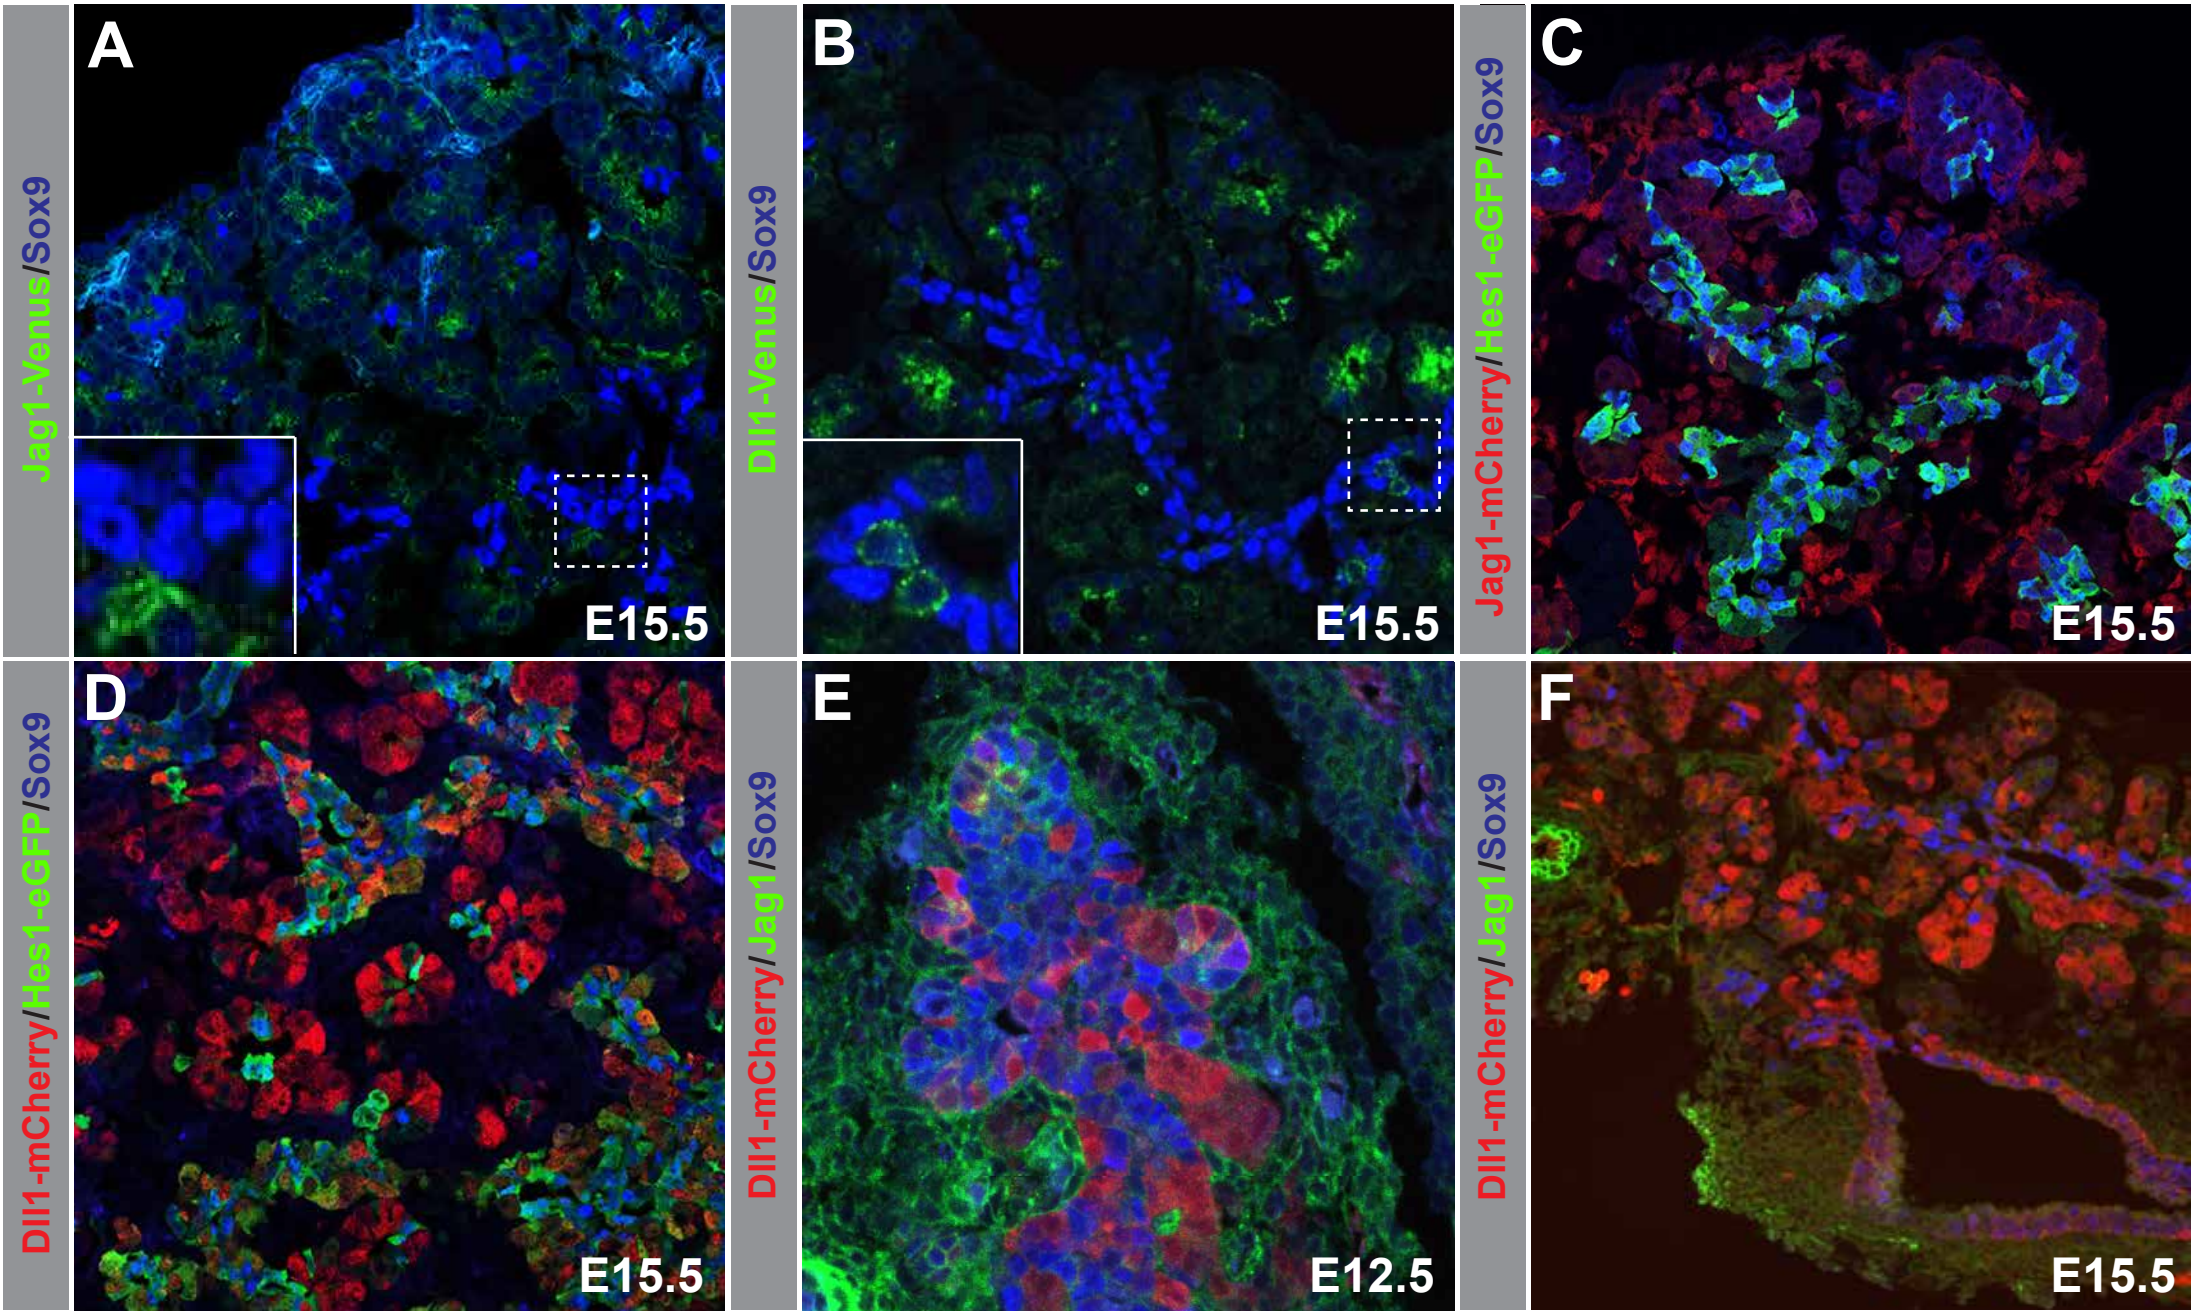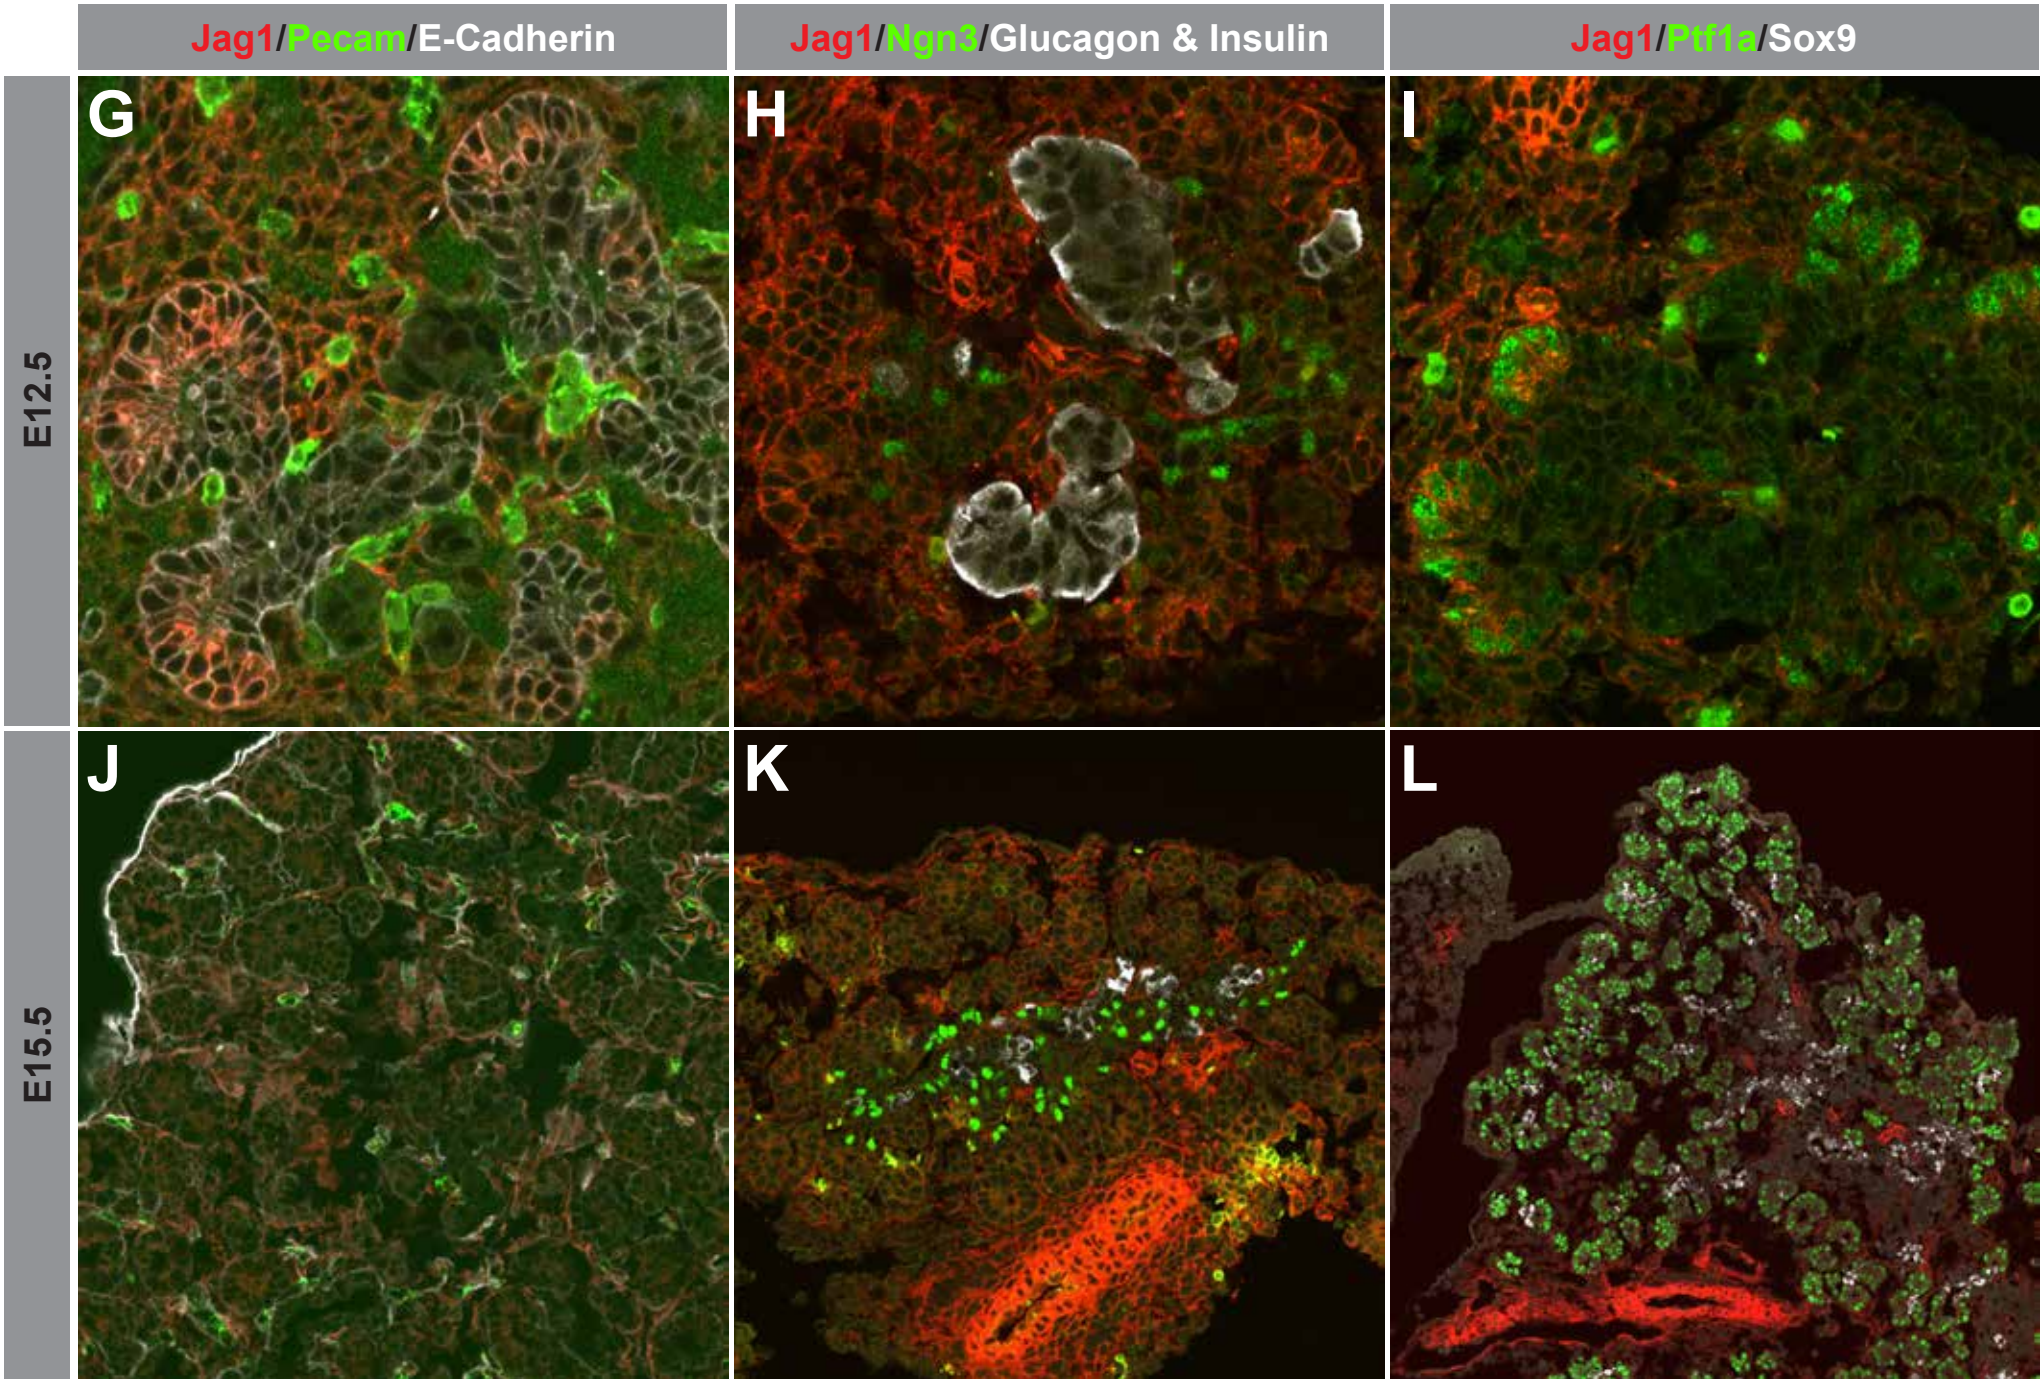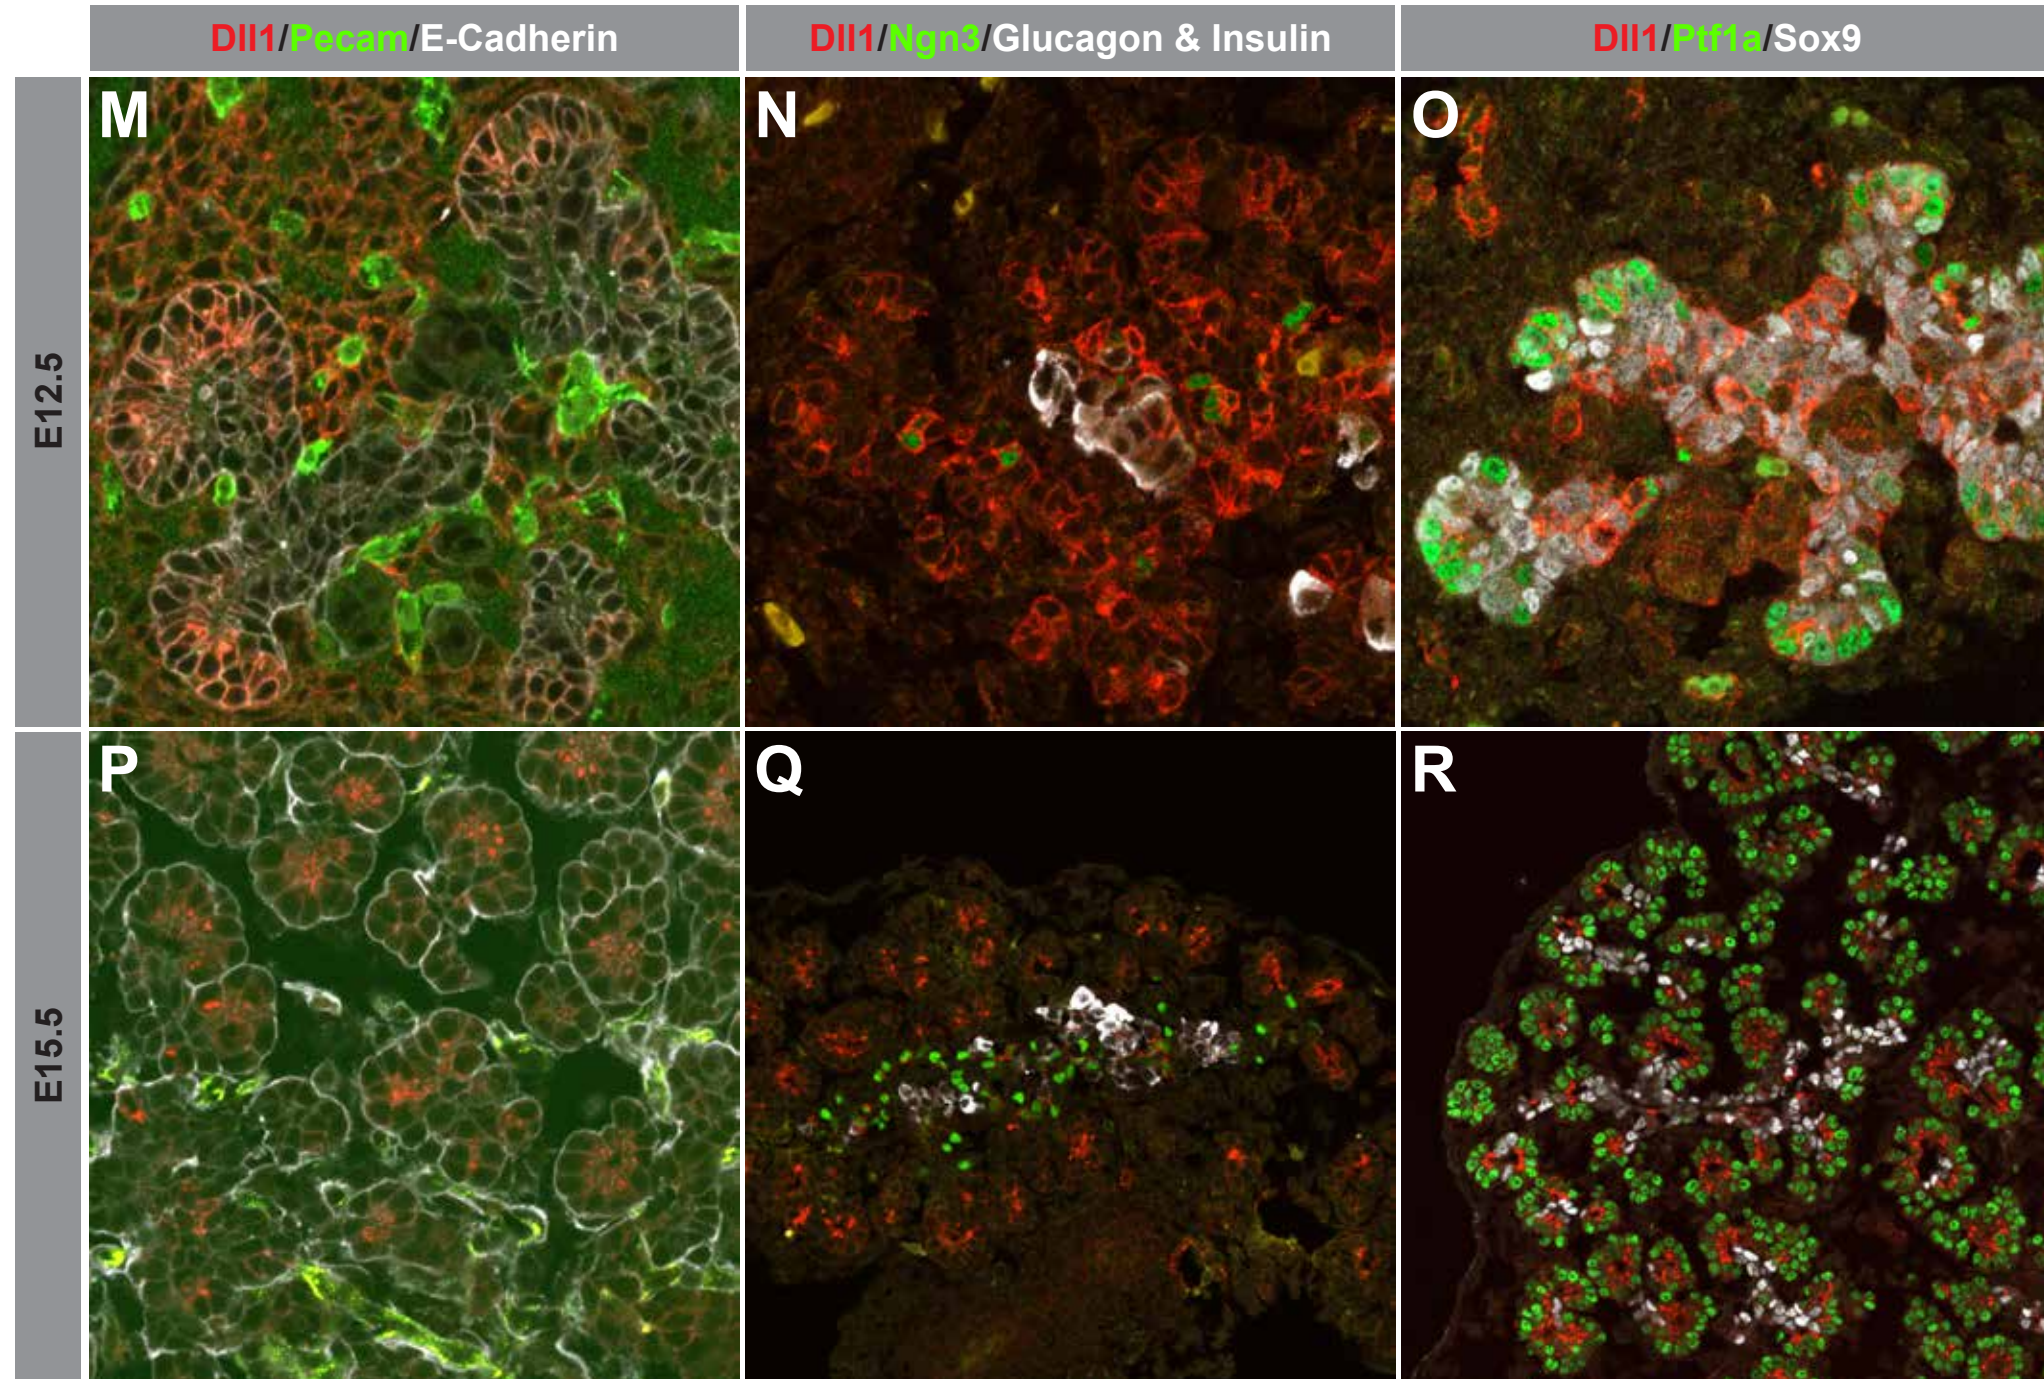



Supplemental Figure 4

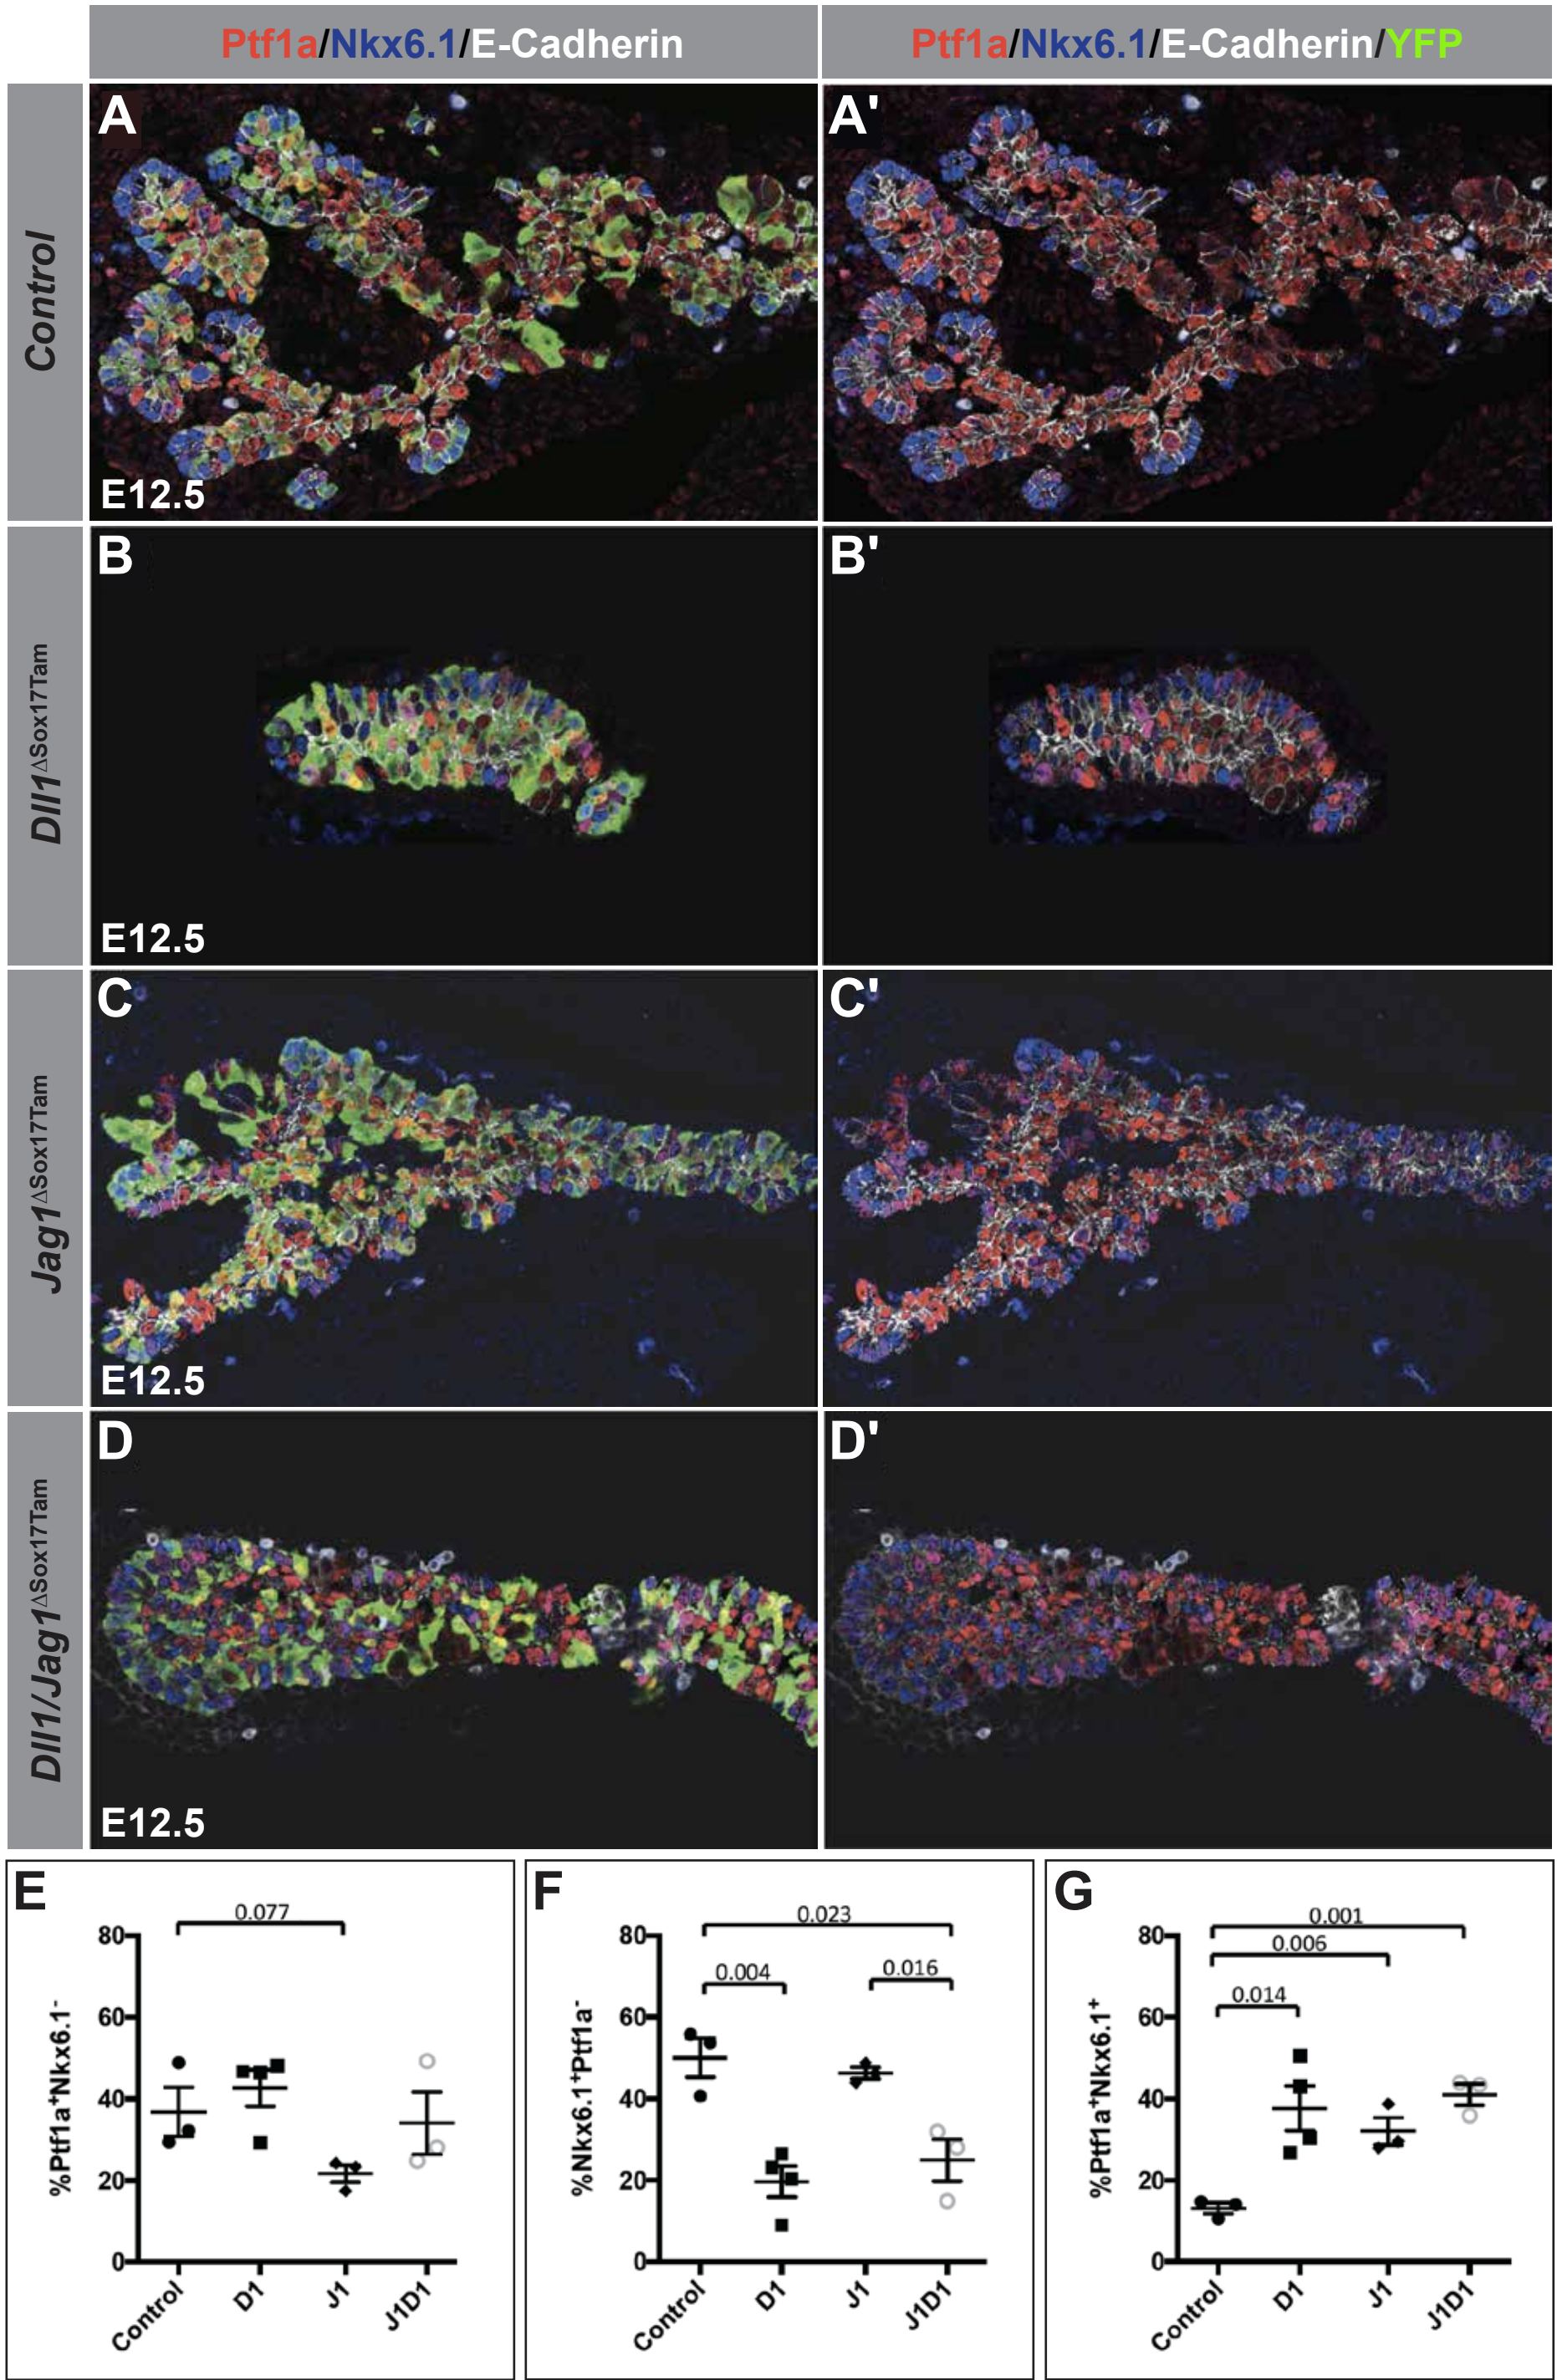



Supplemental Figure 5

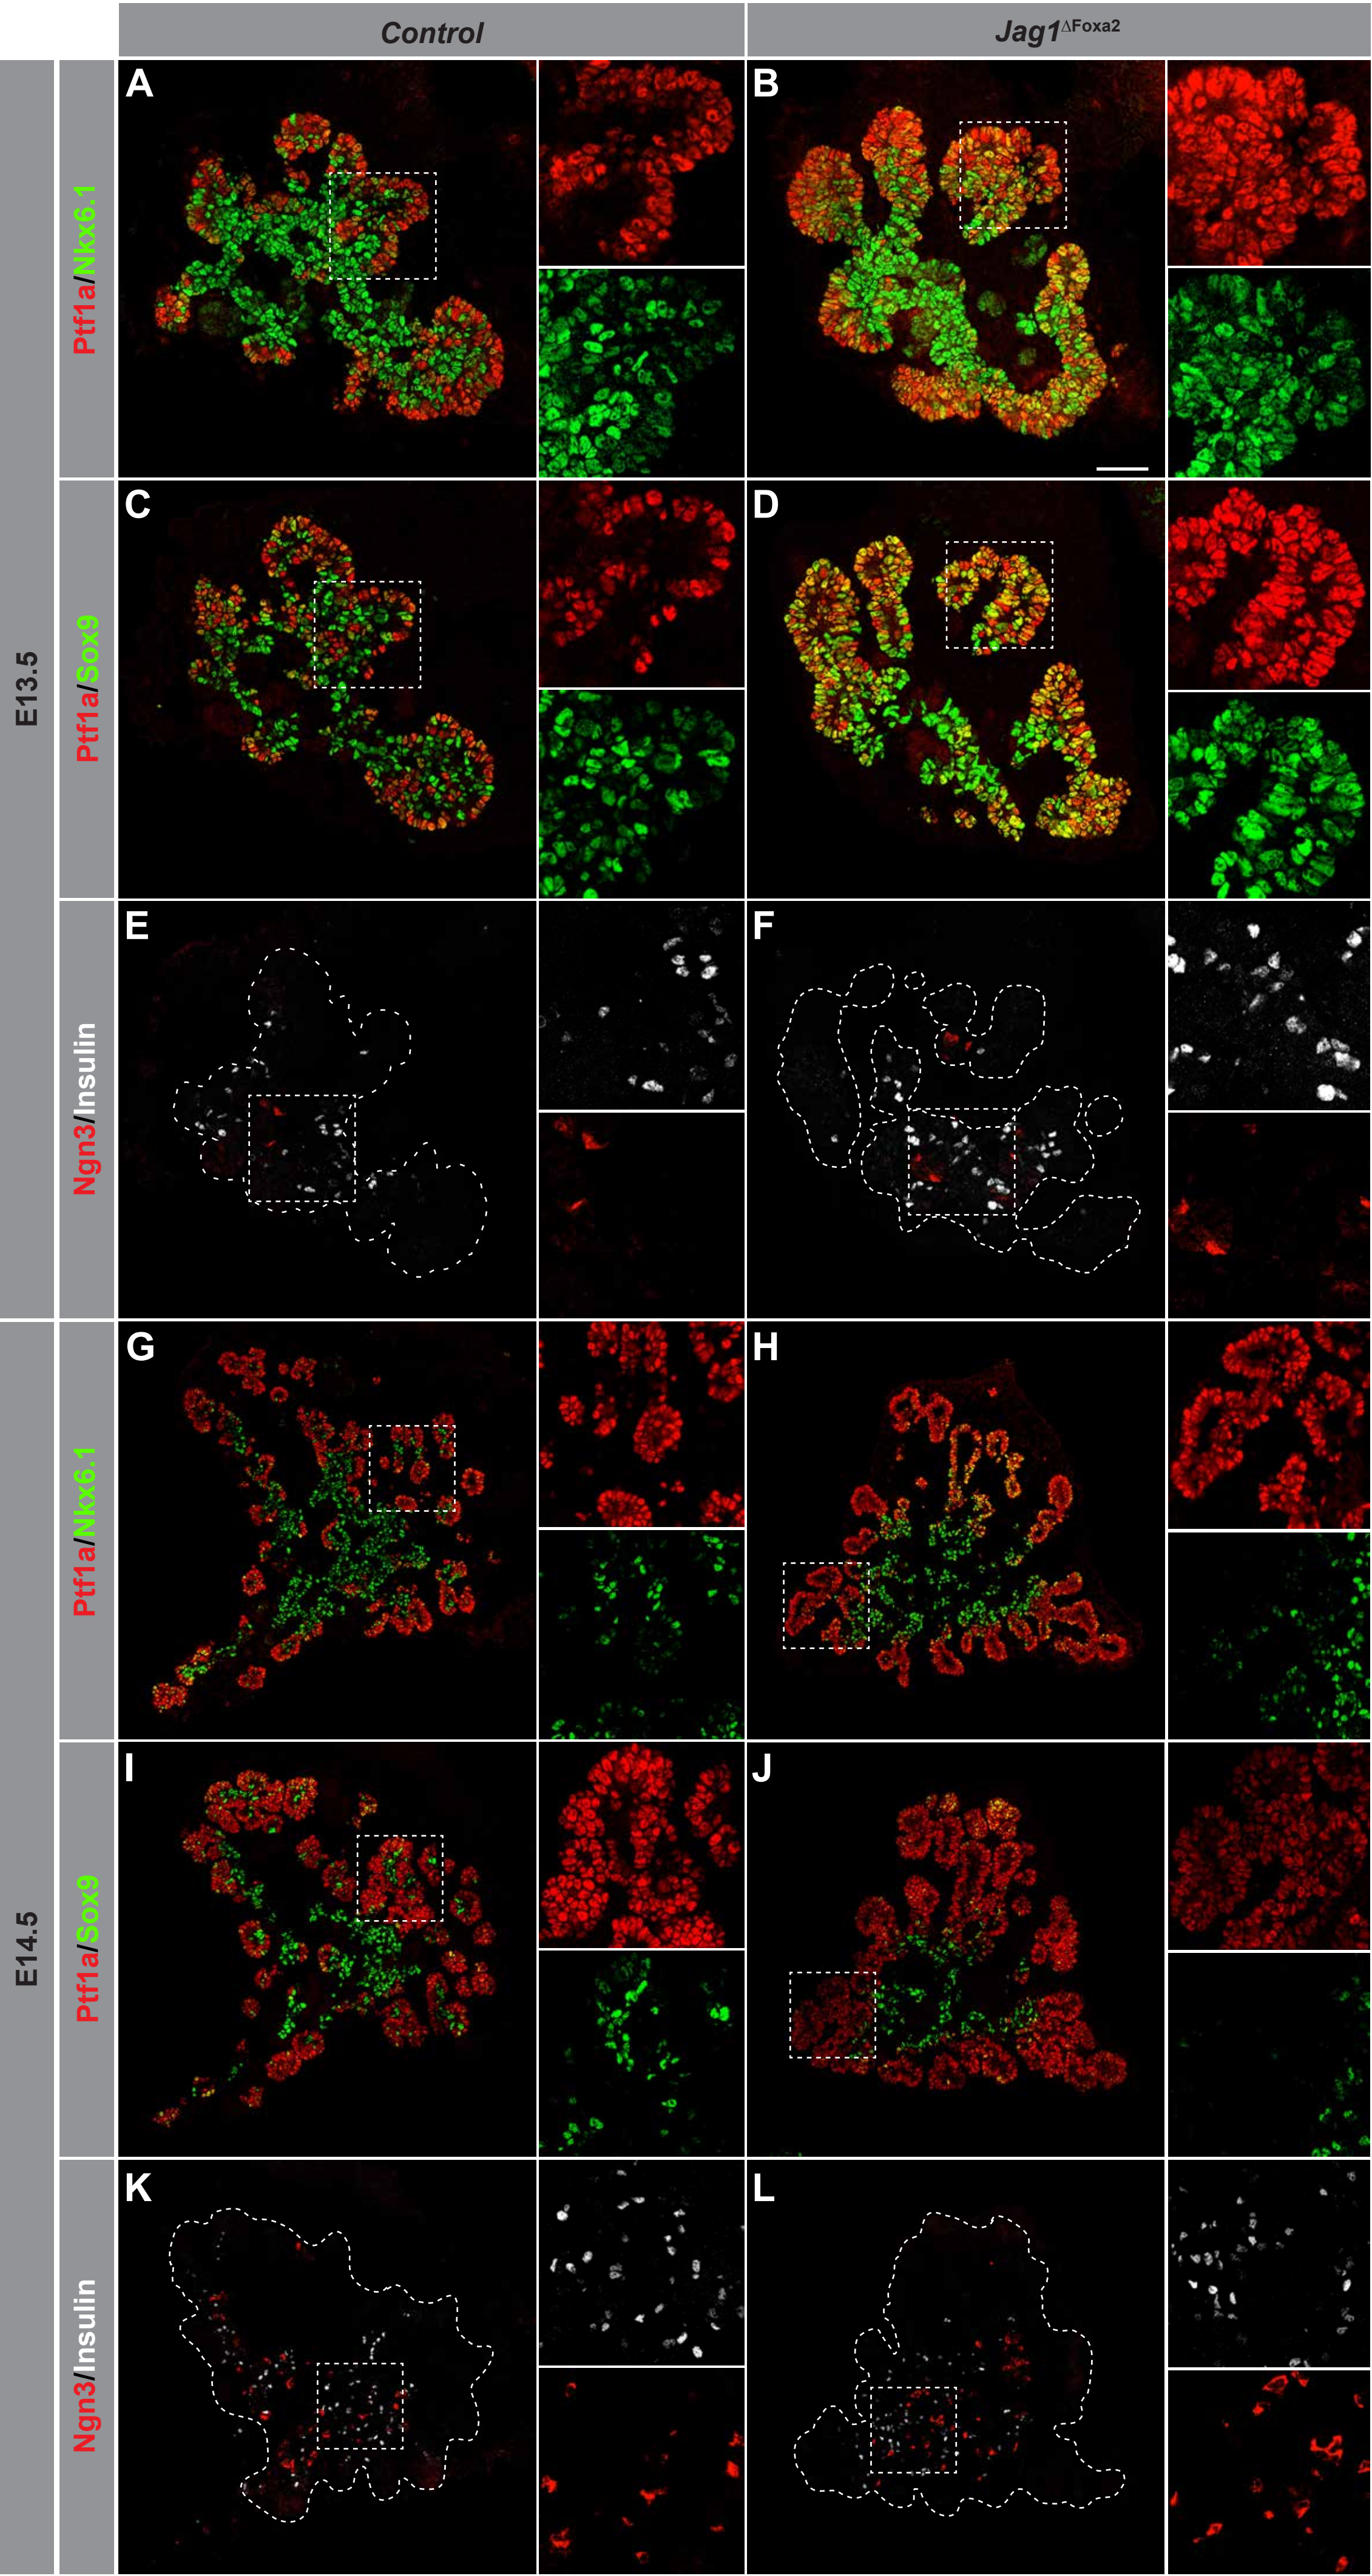



Supplemental Figure 6

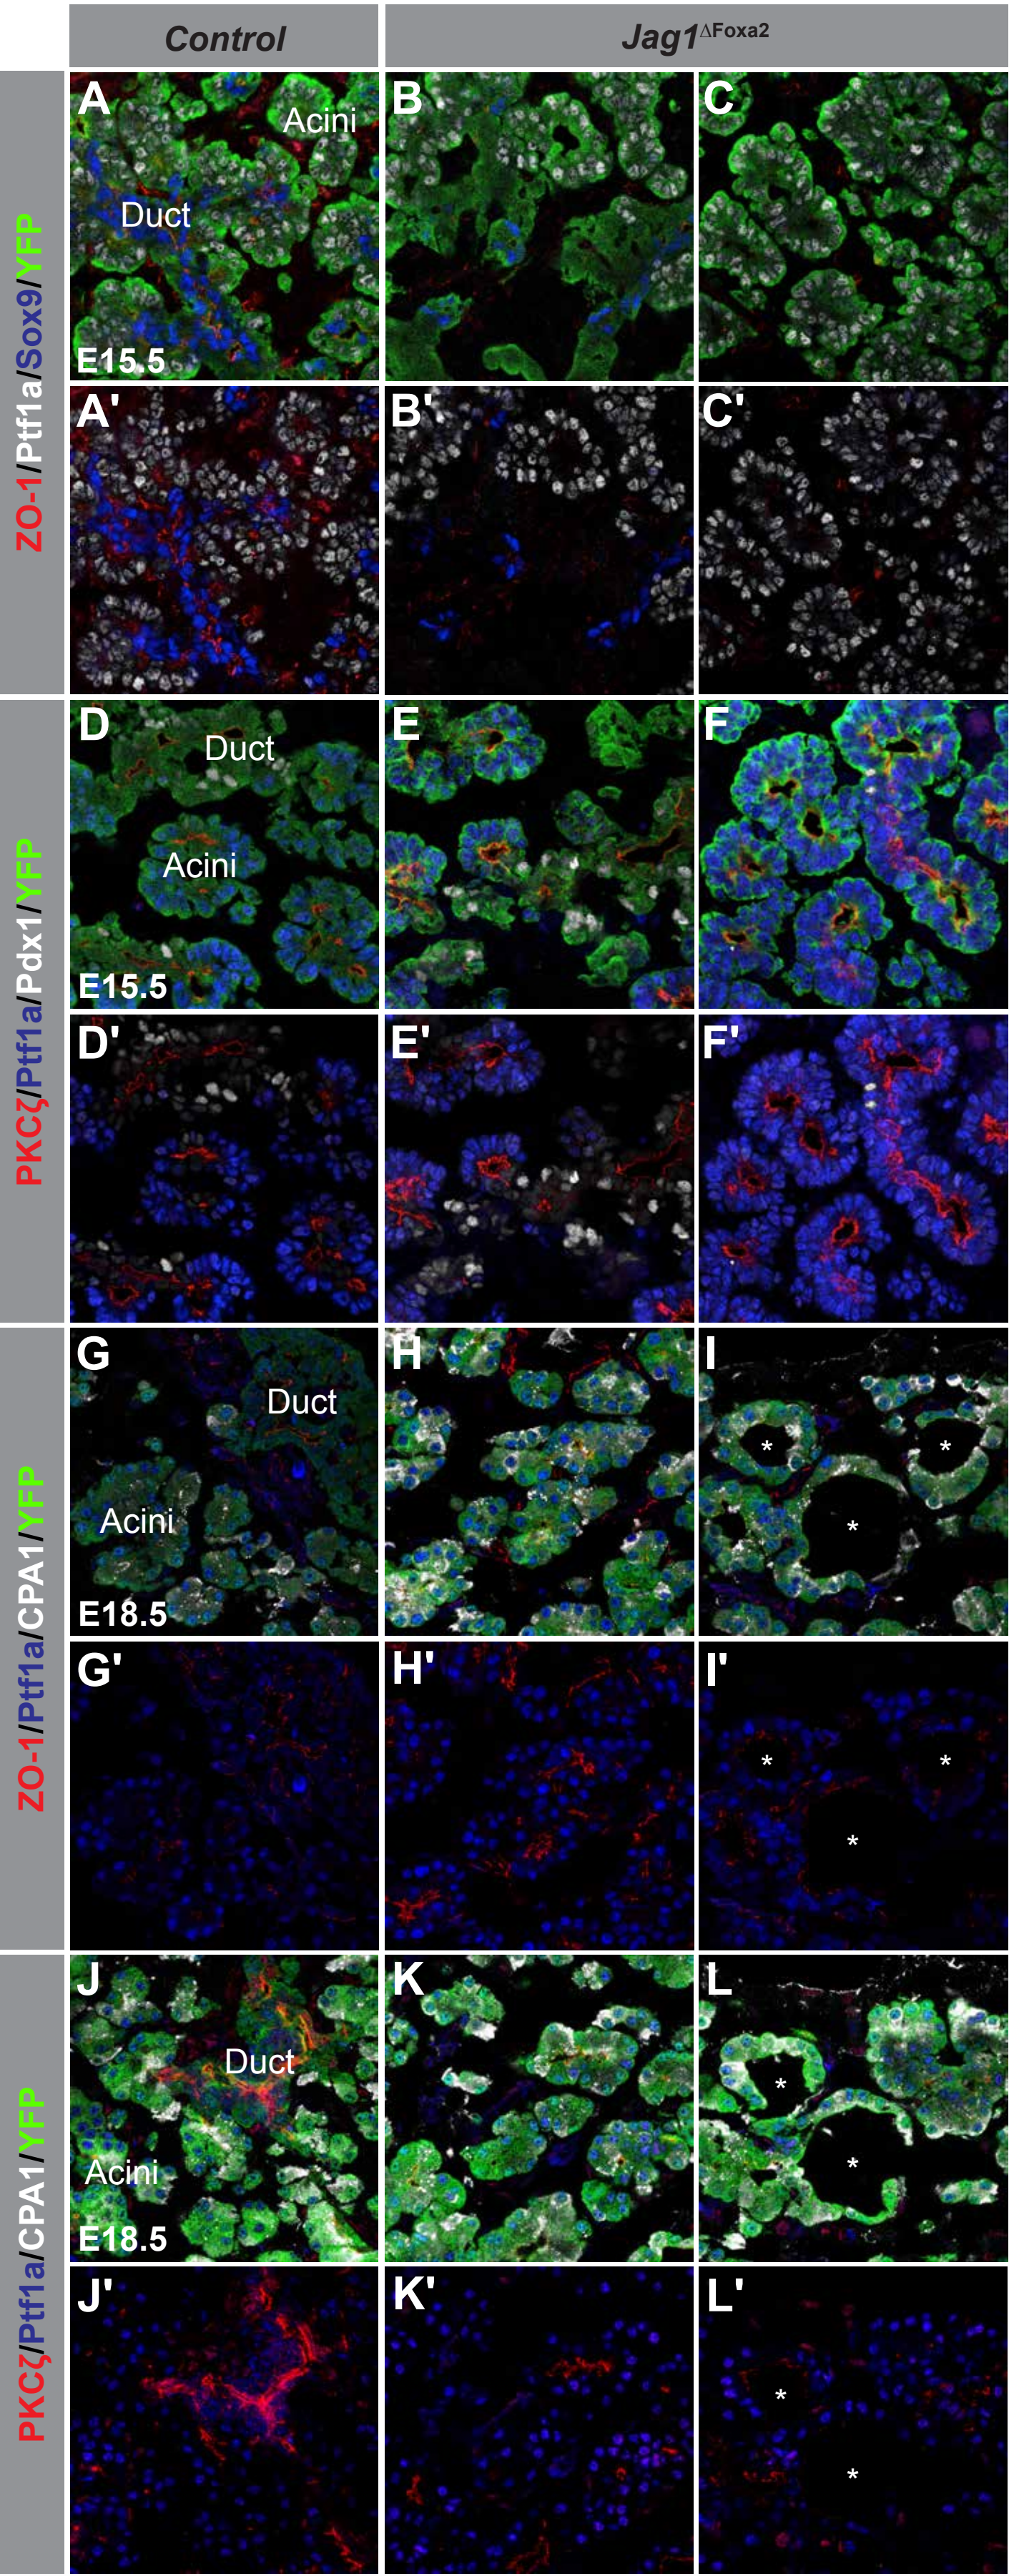



Supplemental Figure 7

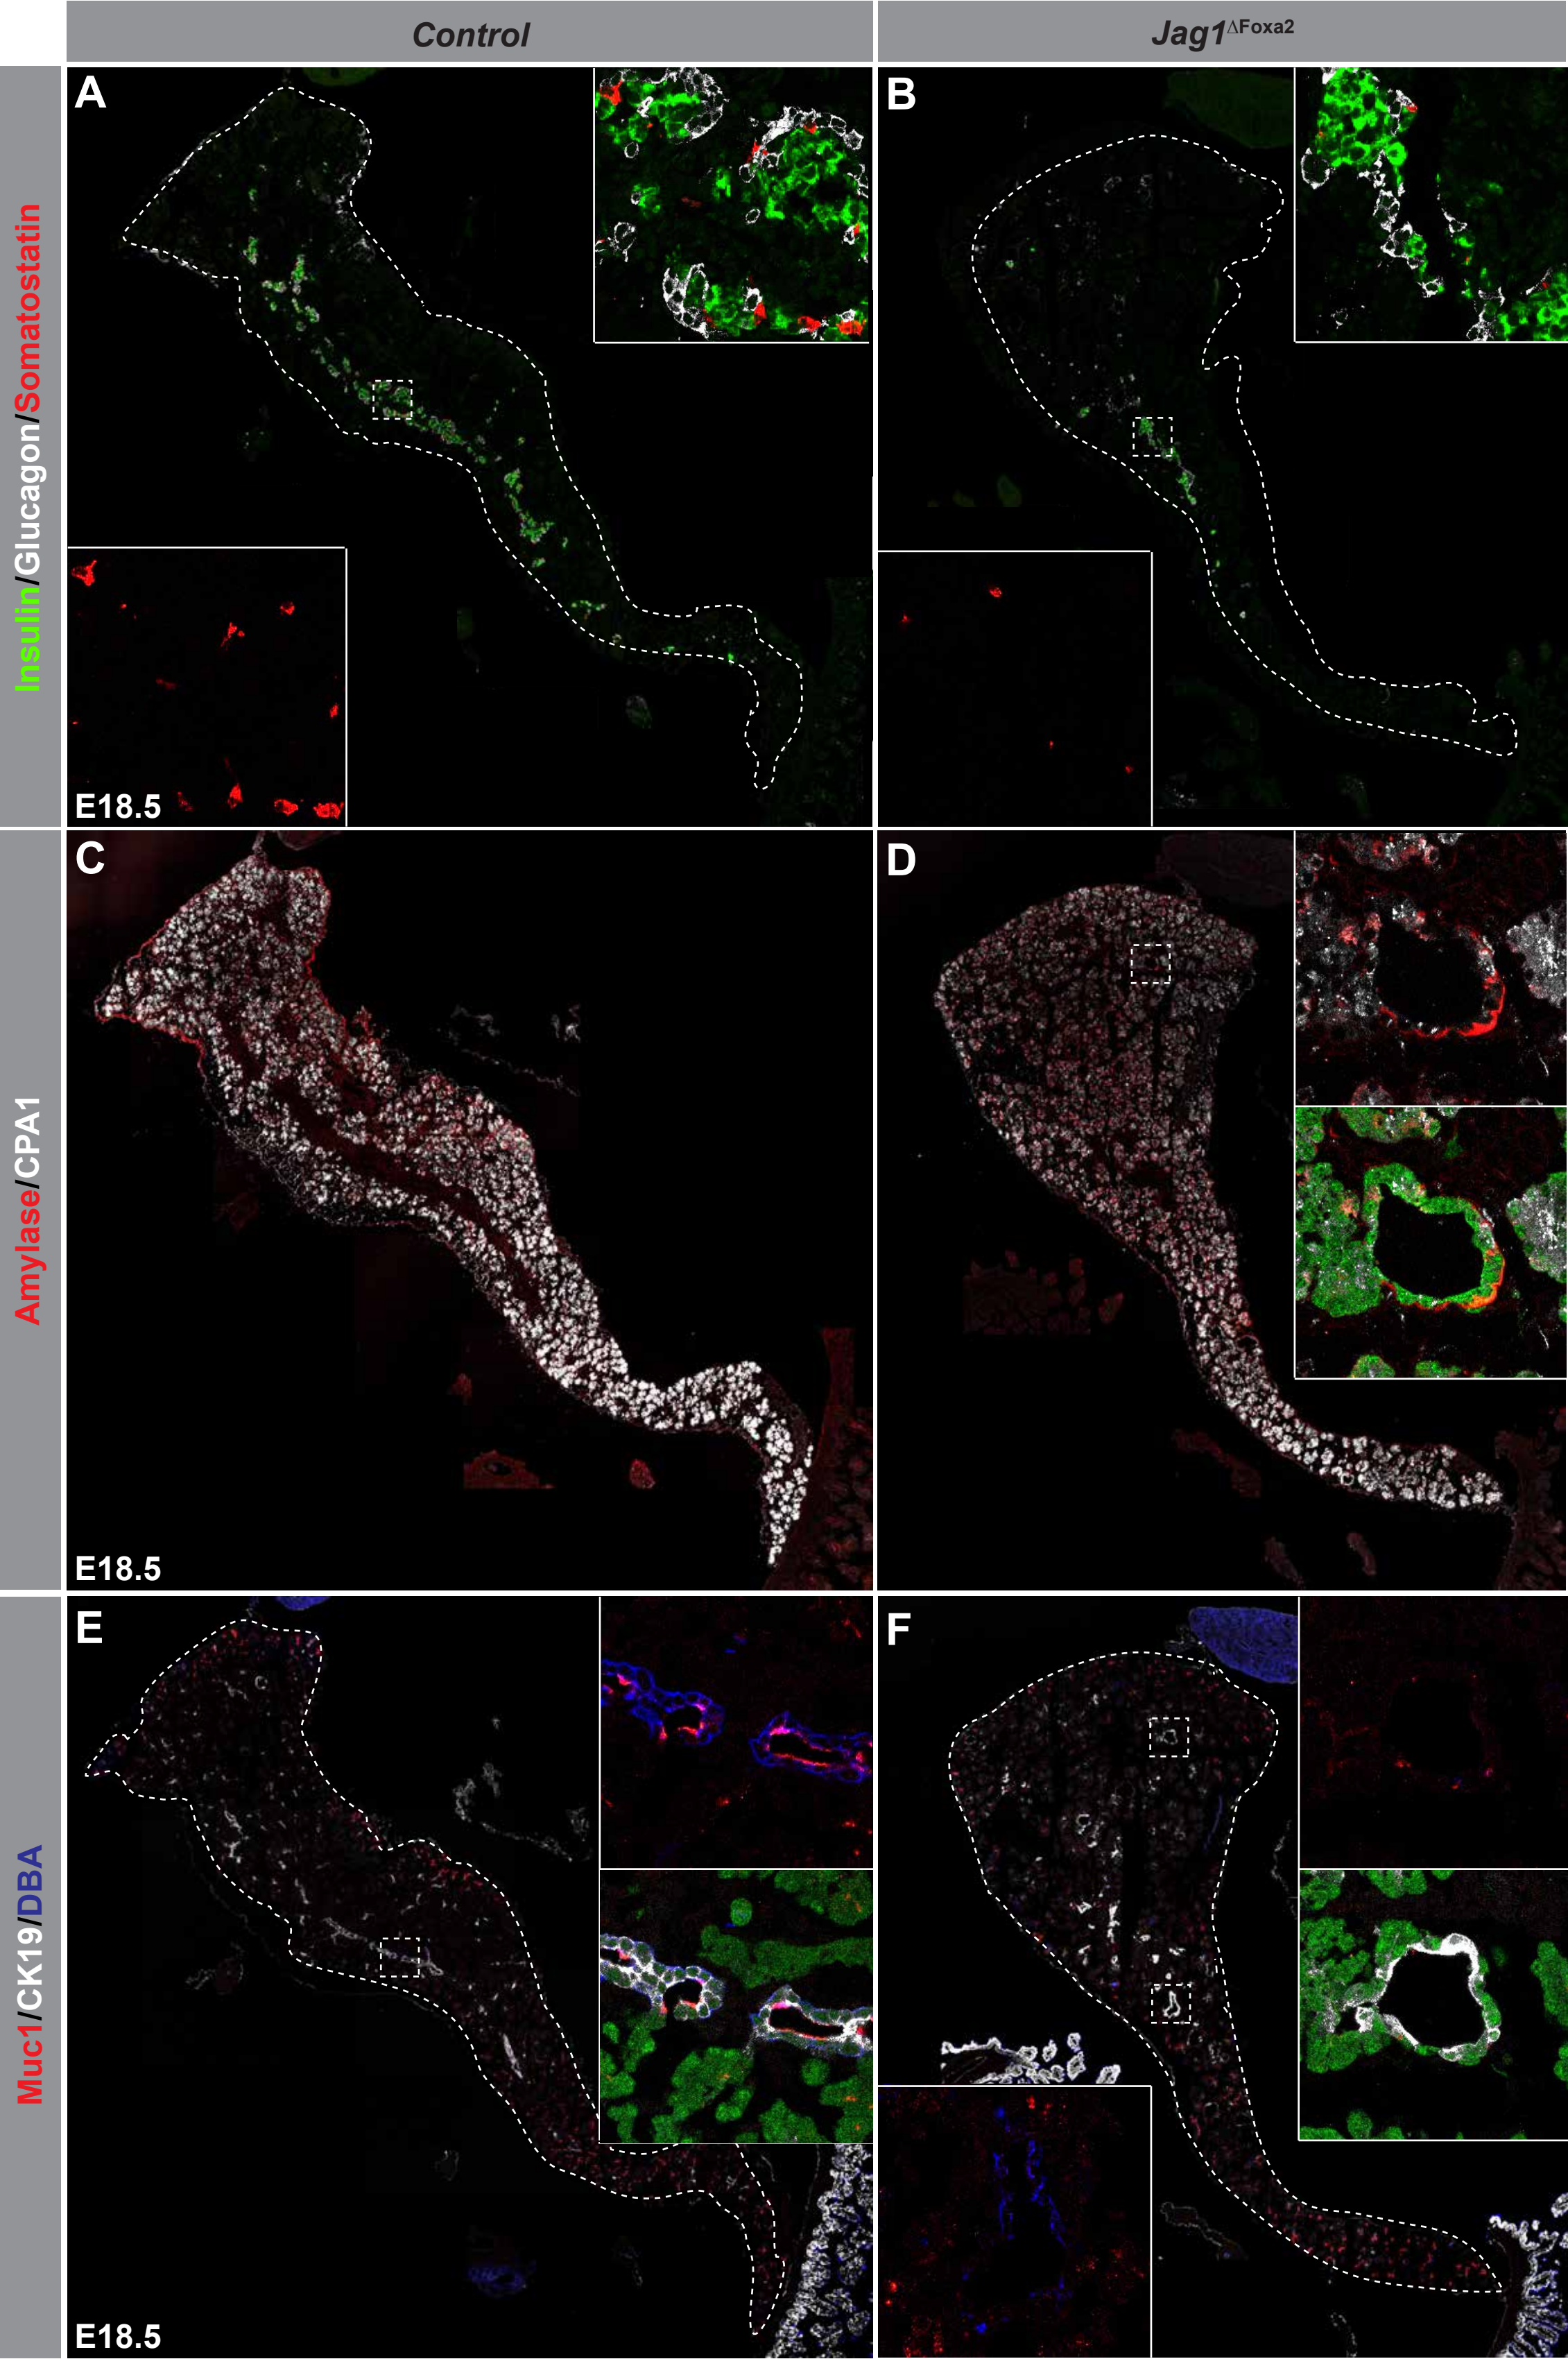

Supplement: Supplementary file [file 336529-1.pdf]
