# Supplementary material for: Jag1 modulates an oscillatory Dll1-Notch-Hes1 signaling module to coordinate growth and fate of pancreatic progenitors
Source: bioRxiv or medRxiv preprint supplement (doi:10.1101/336529), 2019-06-26
Supplement: Supplementary file [file media-1.pdf]

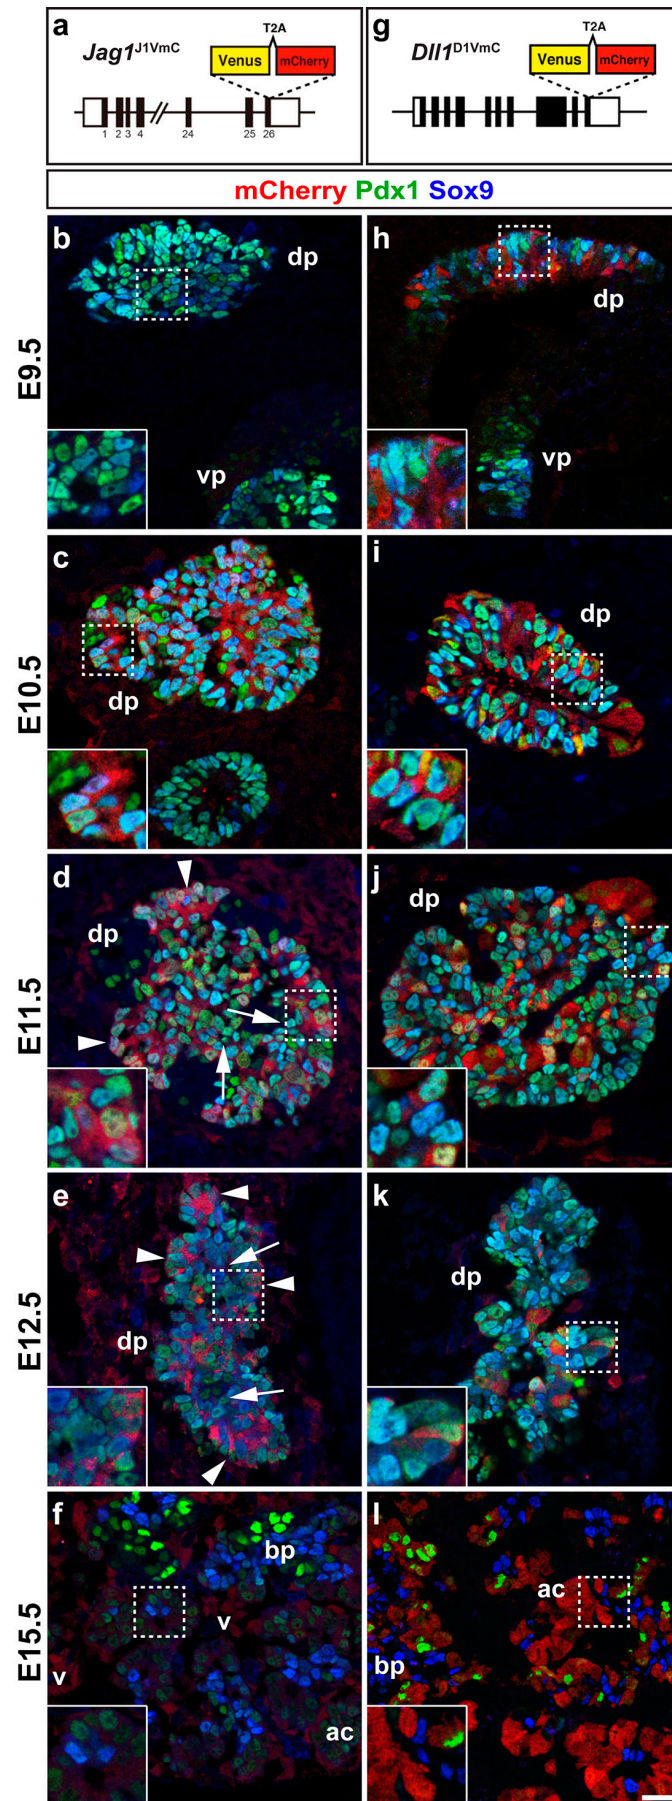

Supplementary Figure 1

**Supplementary Fig. 1.** Expression of Jag1 and Dll1 in the developing pancreas. **a, g** Schematics showing the structure of the *Jag1*<sup>J1V<sub>m</sub>C</sup> **a** and *Dll1*<sup>D1V<sub>m</sub>C</sup> **g** reporters. **b-f** Sections of E9.5 **b**, E10.5 **c**, E11.5 **d**, E12.5 **e** and E15.5 **f** *Jag1*<sup>J1V<sub>m</sub>C</sup> embryos stained for Jag1-mCherry, Pdx1 and Sox9 as indicated. Higher magnifications of boxed areas are shown in insets. **h-l** Sections of E9.5 **h**, E10.5 **i**, E11.5 **j**, E12.5 **k** and E15.5 **l** *Dll1*<sup>D1V<sub>m</sub>C</sup> embryos stained for Dll1-mCherry, Pdx1 and Sox9 as indicated. Higher magnifications of boxed areas are shown in insets. dp: dorsal pancreas; vp: ventral pancreas; bp: bi-potent progenitor domain; ac: emerging acini. Scale bar 20  $\mu$ m.



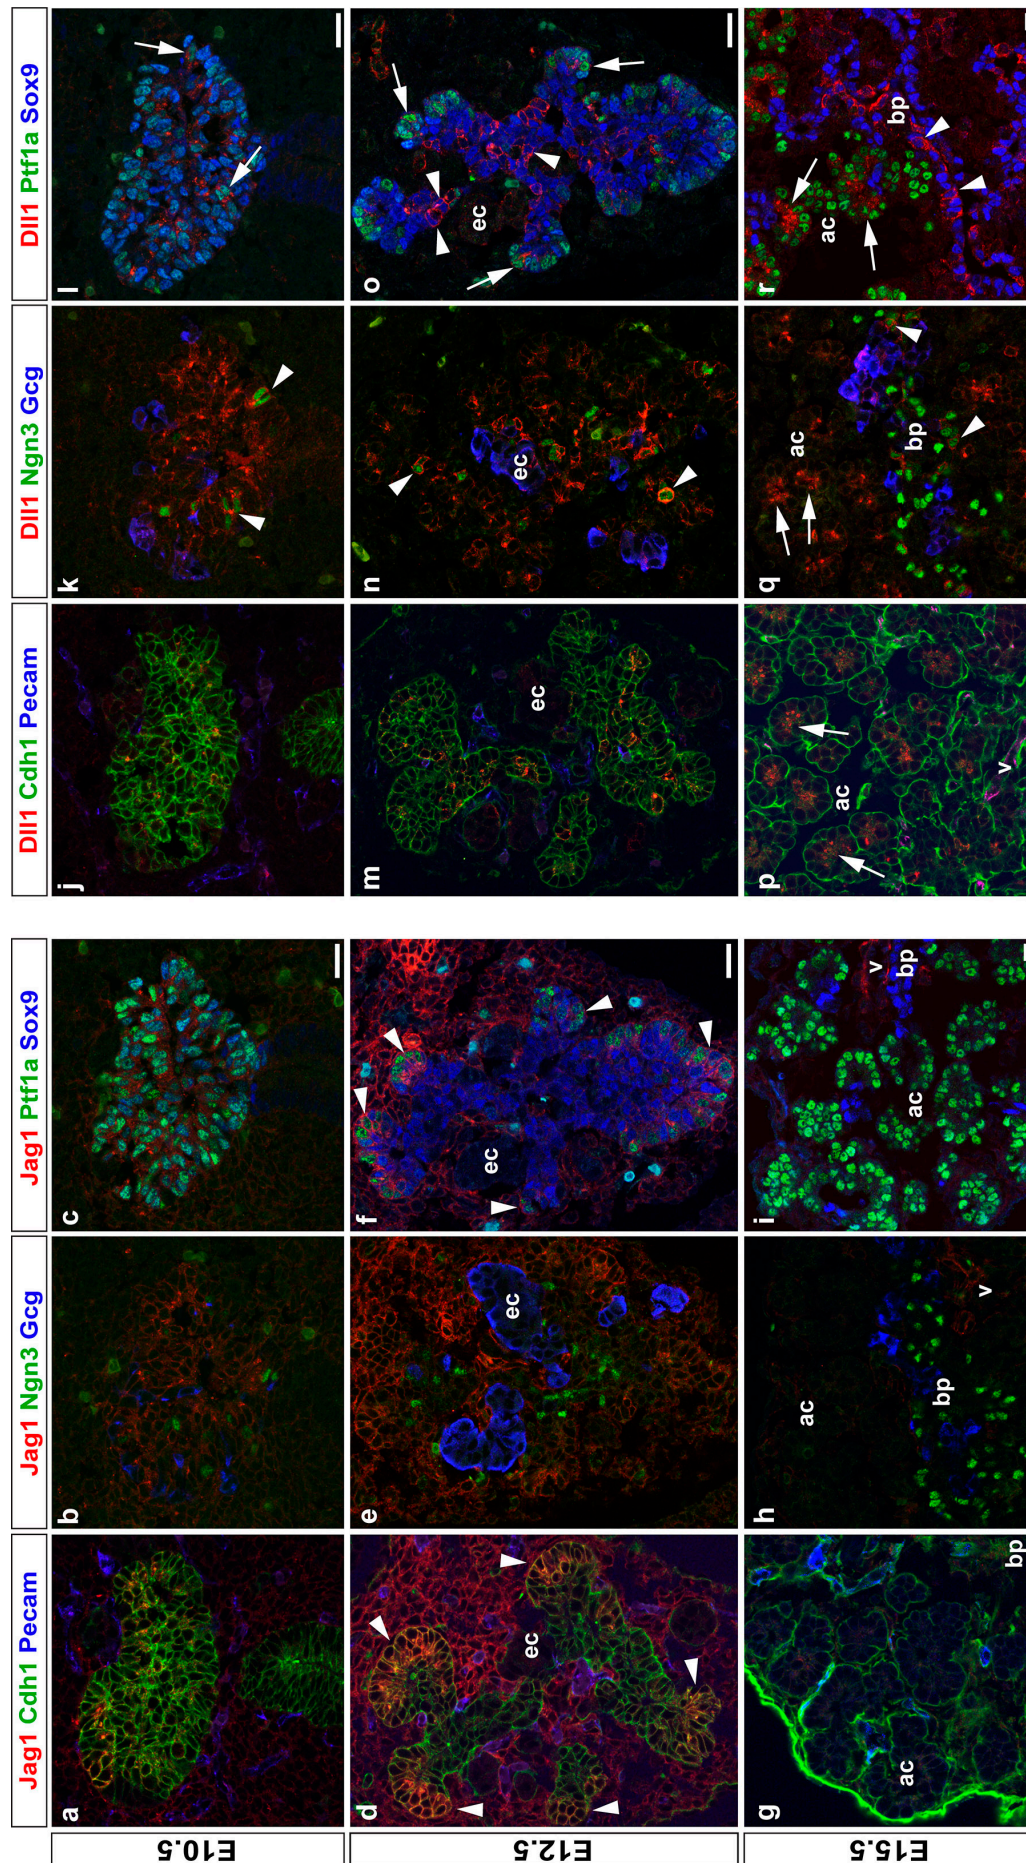

Supplementary Figure 2

**Supplementary Fig. 2.** Cell-specific expression of Jag1 and Dll1 in the developing pancreas. Sections of E10.5 **a-c, j-l**; E12.5 **d-f, m-o**; and E15.5 **g-i, p-r** dorsal pancreata stained for Jag1, Pecam and Cdh1 **a, d, g**; Jag1, Ngn3 and Gcg **b, e, h**; Jag1, Ptf1a, and Sox9 **c, f, i**; Dll1, Pecam and Cdh1 **j, m, p**; Dll1, Ngn3 and Gcg **k, n, q** or Dll1, Ptf1a, and Sox9 **l, o, r** in the indicated colors. bp: bi-potent progenitor domain; ec: endocrine cells; ac: emerging acini; v: vessel. Scale bars, 25  $\mu$ m. Note the initial uniform epithelial expression of Jag1 at E10.5 **a-c**, which becomes confined to Ptf1a<sup>+</sup> PACs in the distal epithelium at E12.5 (arrowheads in **d** and **f**). Note Dll1 expression in Ngn3<sup>+</sup> cells (arrows in **k, n, q**), in Ptf1a<sup>+</sup> cells (arrows in **l, o-r**) at all stages and in Sox9<sup>+</sup> BPs at E12.5 and E15.5 (arrowheads in **o** and **r**).



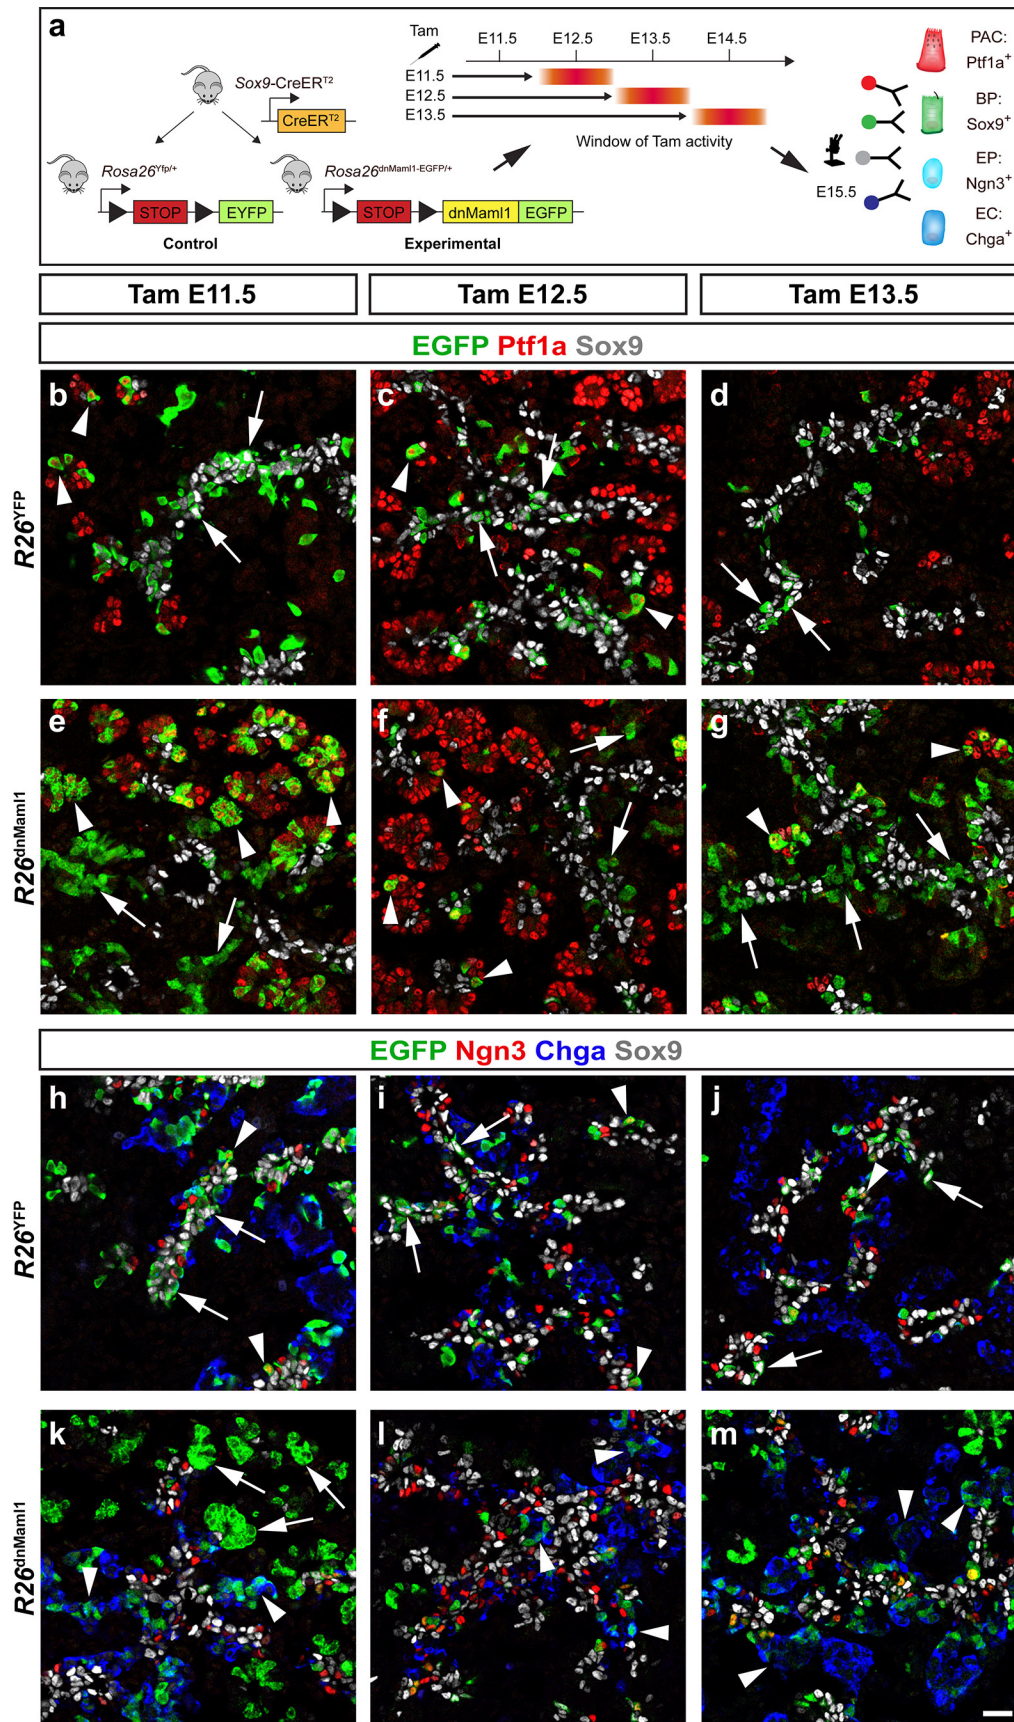

Supplementary Figure 3

**Supplementary Fig. 3.** Stage-dependent allocation of progenitor fate induced by Notch suppression. **a** Schematic overview of strategy applied to identify fates of progeny from pancreatic progenitors in which Notch-mediated transcriptional activation is prevented by *Sox9-CreER<sup>T2</sup>*-mediated expression of a dnMaml1-GFP fusion protein from the *Rosa26* locus at different developmental stages. Approximate temporal windows of Tamoxifen (Tam) activity resulting from single intraperitoneal injections at E11.5, E12.5 or E13.5 are indicated. **b-m** Sections of E15.5 *Sox9-CreER<sup>T2</sup>; R26<sup>YFP</sup>* control **b-d, h-j** or *Sox9-CreER<sup>T2</sup>; R26<sup>dnMaml1</sup>* Notch-blocked **e-g, k-m** pancreata stained for EYFP/EGFP and Sox9 combined with either Ptf1a **b-g** or Ngn3 and Chga **h-m** in the indicated colors. Note lineage-labeled Sox9<sup>+</sup> BPs (arrows in **b-d**) and Ptf1a<sup>+</sup> PACs (arrowheads in **b** and **c**) in control panels (*R26<sup>YFP</sup>*) and lineage-labeled Ptf1a<sup>+</sup> PACs (arrowheads in **e-g**) and Ptf1a/Sox9 double negative cells (arrows in **e-g**) in experimental panels (*R26<sup>dnMaml1</sup>*). **h-m** Note lineage-labelled Sox9<sup>+</sup> BPs (arrows in **h-j**) and Ngn3<sup>+</sup> endocrine precursors (arrowheads in **h-j**) in control panels (*R26<sup>YFP</sup>*) and lineage-labeled Ngn3/Chga/Sox9 triple negative cells (arrows in **k**) and Chga<sup>+</sup> endocrine cells (arrowheads in **k-m**) in experimental panels (*R26<sup>dnMaml1</sup>*). Scale bar, 50  $\mu$ m.

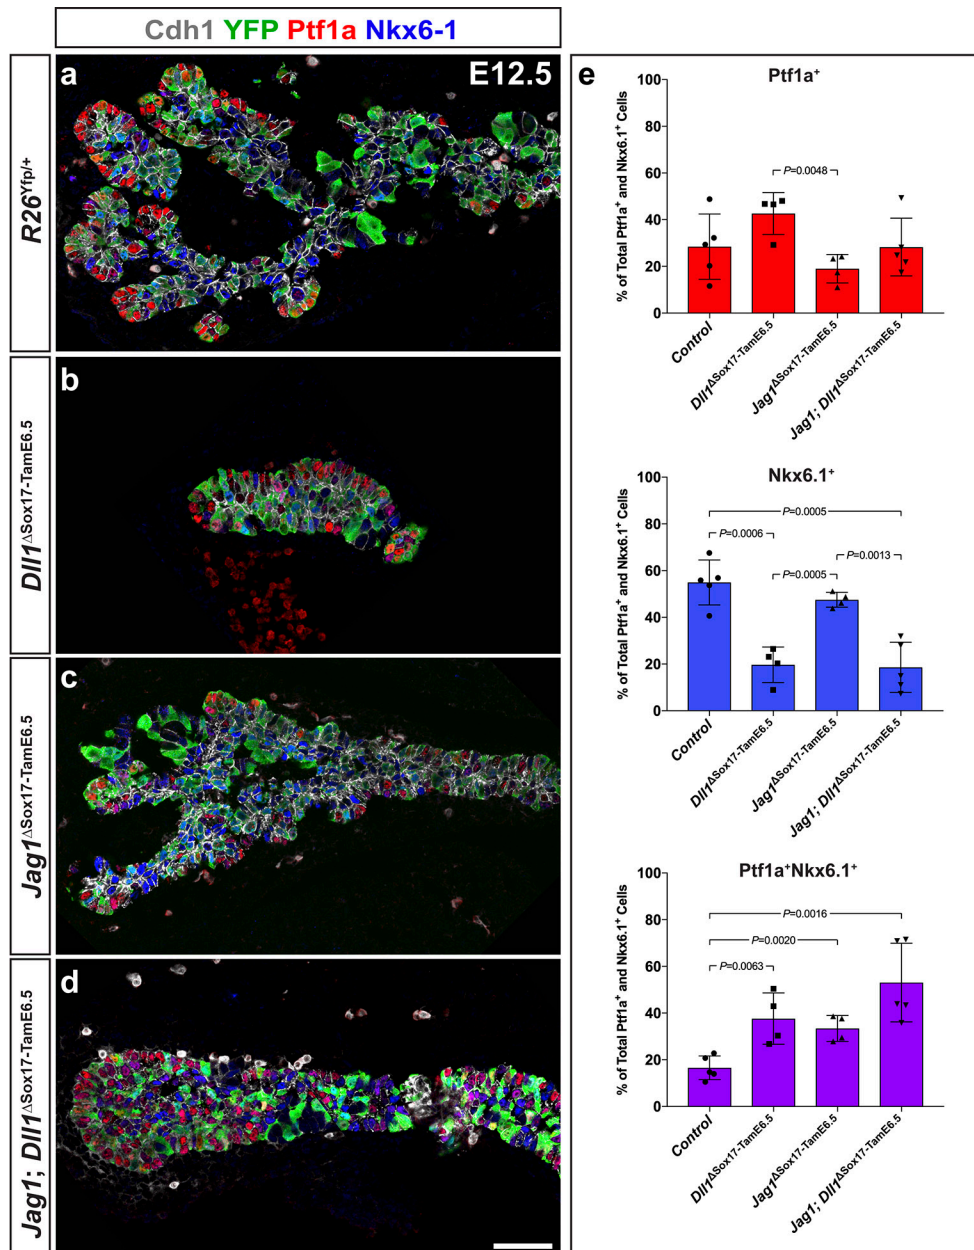

### Supplemental Figure 4

**Supplementary Fig. 4.** Jag1 and Dll1 are both involved in PD patterning. **a-d** IF on Sections of E12.5 embryos of the indicated genotypes stained for Cdh1, YFP, Ptf1a, and Nkx6-1 as indicated. **e** Combined bar graphs/scatter plots showing quantifications of the distribution of Ptf1a<sup>+</sup> (Ptf1a<sup>+</sup>Nkx6-1<sup>-</sup>) PACs (upper panel), Nkx6.1<sup>+</sup> (Ptf1a<sup>-</sup>Nkx6-1<sup>+</sup>) BPs (middle panel) and Ptf1a<sup>+</sup>Nkx6-1<sup>+</sup> cells (lower panel) relative to the number of progenitor cells (the total number of Ptf1a<sup>+</sup> and/or Nkx6-1<sup>+</sup> cells) in dorsal pancreata of the different genotypes. Data are presented as mean ± S.D. Significant *P*-values are



indicated on the plots.  $N=4-5$  as indicated by the number of data points in the scatter plots.

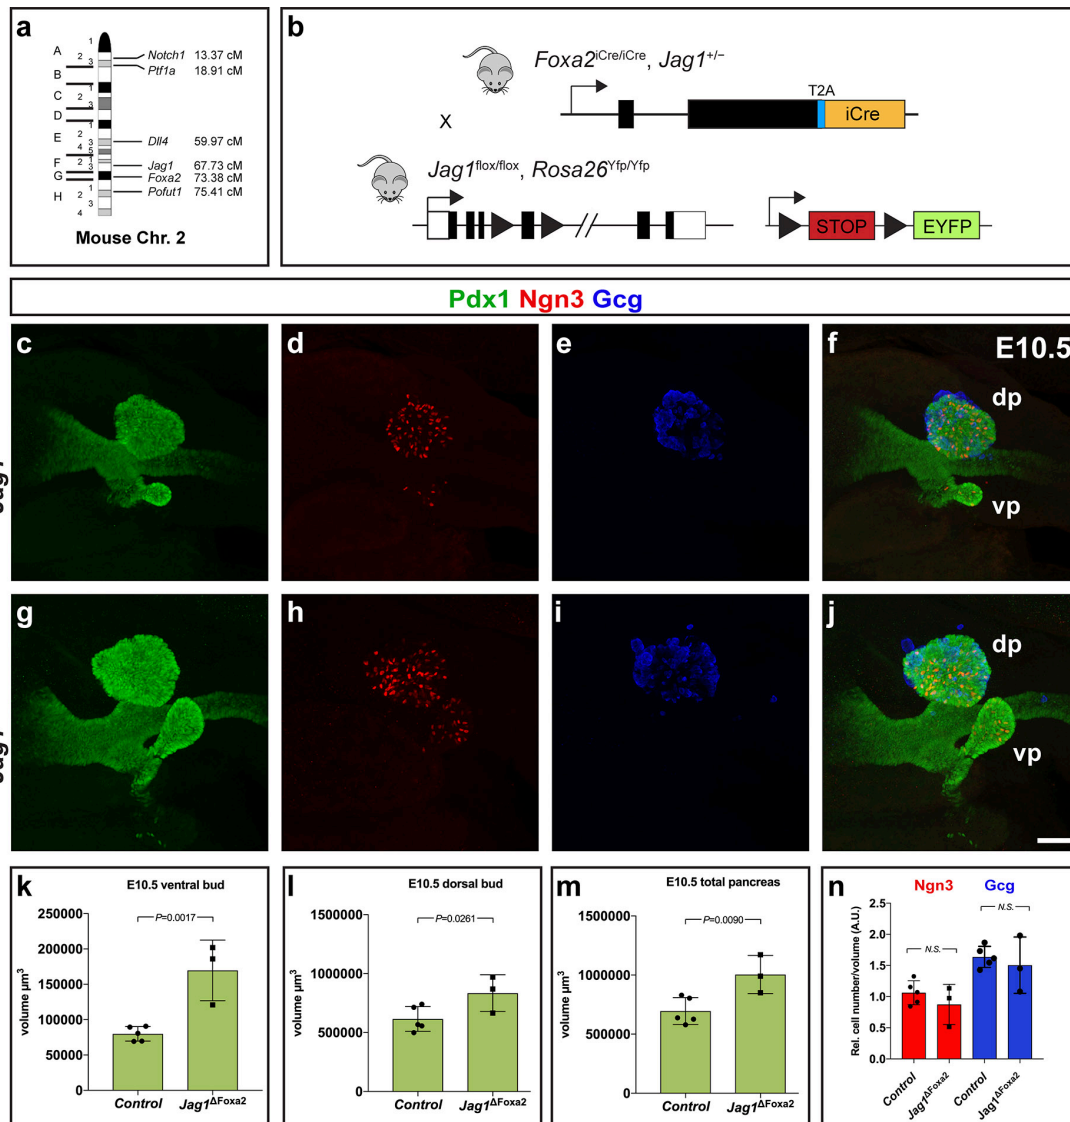

**Supplementary Figure 5**

**Supplementary Fig. 5.** The pancreas primordia are enlarged in E10.5 *Jag1*<sup>ΔFoxa2/-</sup> mutants. **a** Schematic showing linkage of relevant Cre-driver genes and key Notch pathway genes on mouse chromosome 2. Note the need for meiotic recombination and carefully designed and monitored genotyping in order to obtain e.g. *Jag1*<sup>ΔFoxa2</sup> or *Notch1*<sup>ΔPtf1a</sup> mutants. **b** Schematic showing mating strategy to obtain mutant embryos once the proper parental meiotic recombinants are identified. **c-j** 3D maximum intensity projections of E10.5 *Jag1*<sup>ΔFoxa2/+</sup> **c-f** and *Jag1*<sup>ΔFoxa2/-</sup> **g-j** pancreata stained for Pdx1, Ng3 and Gcg as indicated. dp: dorsal pancreas; vp: ventral pancreas. **k-m** Combined bar graphs/scatter plots showing quantifications of volume of Pdx1<sup>Hi</sup> cells in ventral **k**, dorsal **l** and total **m** pancreas primordia. **n** Combined bar graphs/scatter plots showing quantifications of Ng3<sup>+</sup> and Gcg<sup>+</sup> cells relative to progenitor volume.

Significant  $P$ -values are indicated on the plots.  $N=3-5$  as indicated by the number of data points in the scatter plots.



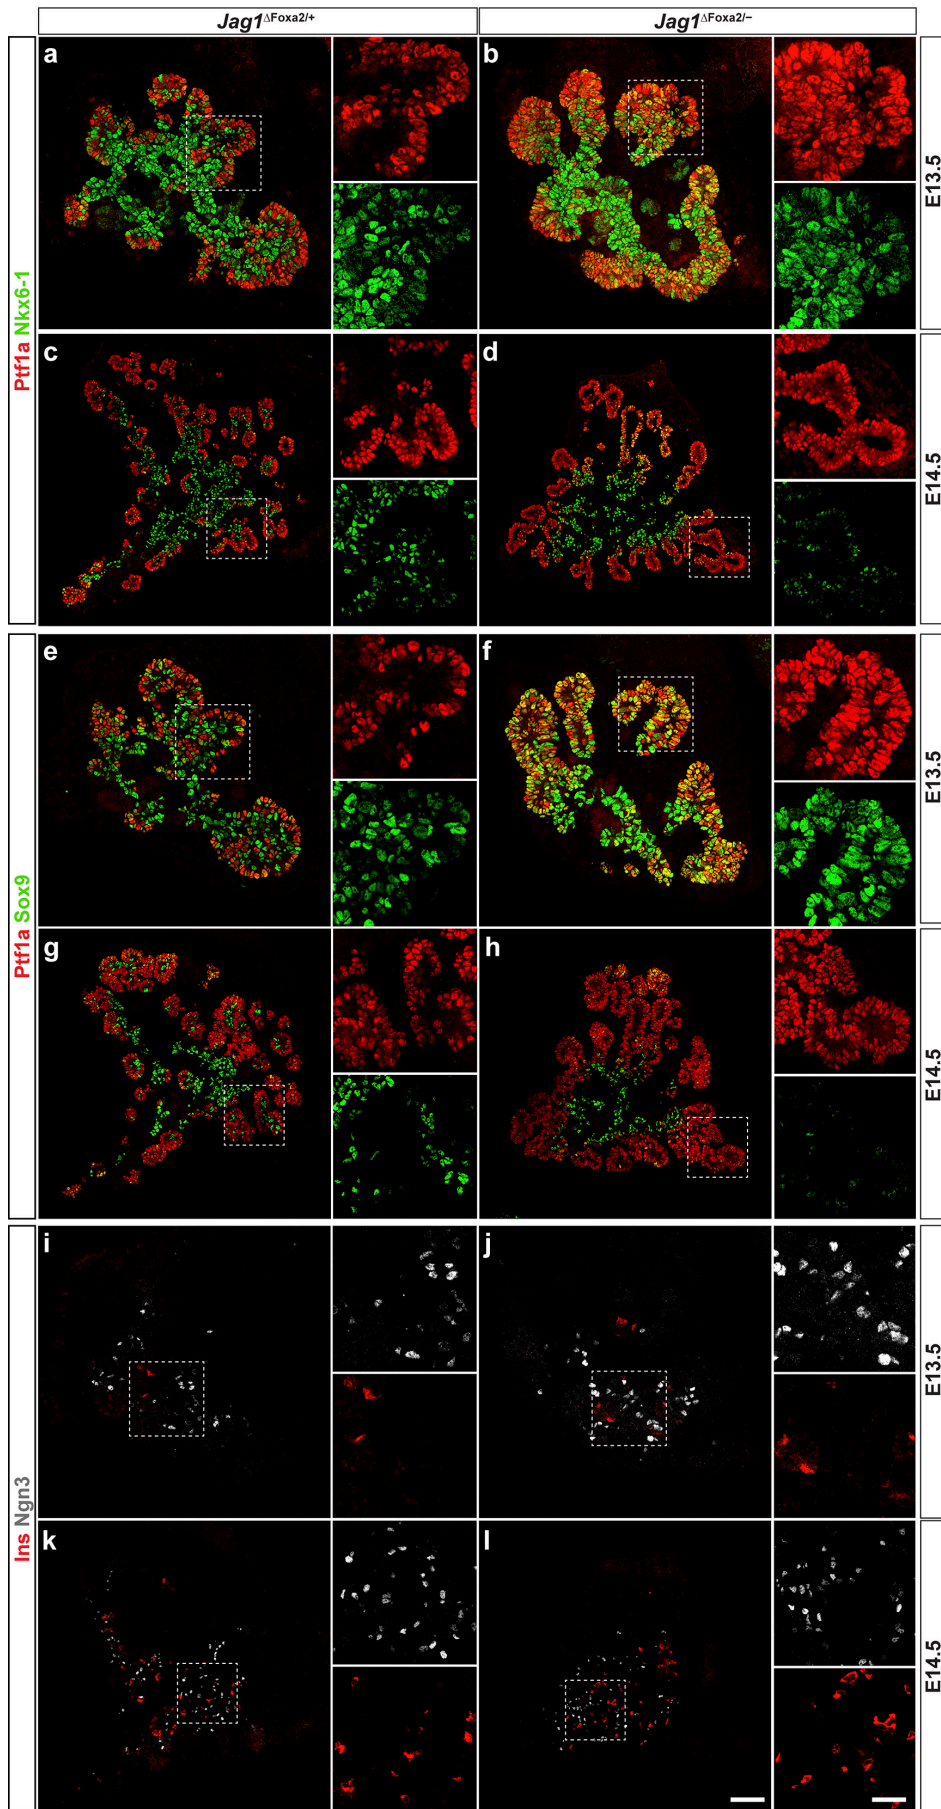

Supplemental Figure 6

**Supplementary Fig. 6.** Delayed resolution of PD patterning in the *Jag1*<sup>ΔF<sub>oxa2</sub></sup> pancreas. **a-l** Sections of E13.5 **a, b, e, f, i, j** and E14.5 **c, d, g, h, k, l** pancreata from *Jag1*<sup>ΔF<sub>oxa2</sub>/+</sup> **a, c, e, g, i, k** and *Jag1*<sup>ΔF<sub>oxa2</sub>/−</sup> **b, d, f, h, j, l** embryos stained for Ptf1a and Nkx6-1 **a-d**, Ptf1a and Sox9 **e-h**, or insulin (Ins) and Ngn3 as indicated **i-l**. Insets show higher magnifications of individual channels. Note that while extensive co-expression of Ptf1a with Nkx6-1 and Sox9 is maintained in the E13.5 *Jag1*<sup>ΔF<sub>oxa2</sub>/−</sup> pancreas **b, f** compared to *Jag1*<sup>ΔF<sub>oxa2</sub>/+</sup> littermates **a, e**, the Ptf1a and Nkx6-1 expression domains have largely resolved by E14.5 in the mutant **d, h**. However, distal Nkx6-1<sup>+</sup>Sox9<sup>+</sup> BPs are essentially absent from *Jag1*<sup>ΔF<sub>oxa2</sub>/−</sup> mutants (compare insets in **c** and **g** to **d** and **h**). Presence of Ins<sup>+</sup> β-cells and Ngn3<sup>+</sup> endocrine precursors appear unaffected in E13.5 and E14.5 *Jag1*<sup>ΔF<sub>oxa2</sub>/−</sup> pancreata relative to *Jag1*<sup>ΔF<sub>oxa2</sub>/+</sup> littermates (compare **i** and **k** to **j** and **l**). Scale bars, 50 μm (main panels) and 25 μm (insets).

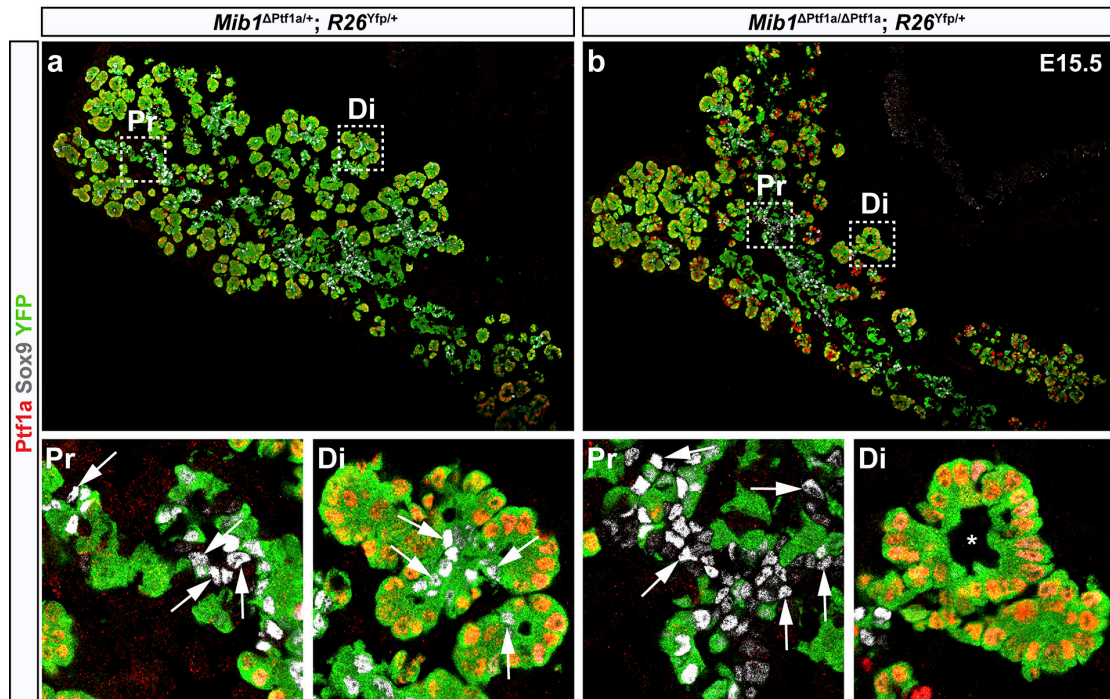

**Supplementary Figure 7**

**Supplementary Fig. 7.** E15.5 *Mib1*<sup>ΔPtf1a</sup> pancreas lacks CAC precursors. **a, b** Sections of E15.5 *Mib1*<sup>ΔPtf1a/+</sup>; *R26*<sup>YFP/+</sup> **a** and *Mib1*<sup>ΔPtf1a/ΔPtf1a</sup>; *R26*<sup>YFP/+</sup> **b** pancreata stained for Ptf1a, Sox9 and YFP as indicated. Insets show higher magnification views of boxed areas; Pr (proximal) and Di (distal). Note that recombination is mosaic in the Sox9<sup>+</sup> domain (arrows in Pr insets) but uniformly high in the Ptf1a<sup>+</sup> domain. Also note that terminal most Sox9<sup>+</sup> cells located within forming acini of the *Mib1*<sup>ΔPtf1a/+</sup> pancreas (arrows in Di inset) are missing from the *Mib1*<sup>ΔPtf1a/ΔPtf1a</sup> pancreas (asterisk). Scale bars, 100 μm (main panels) and 20 μm (insets).



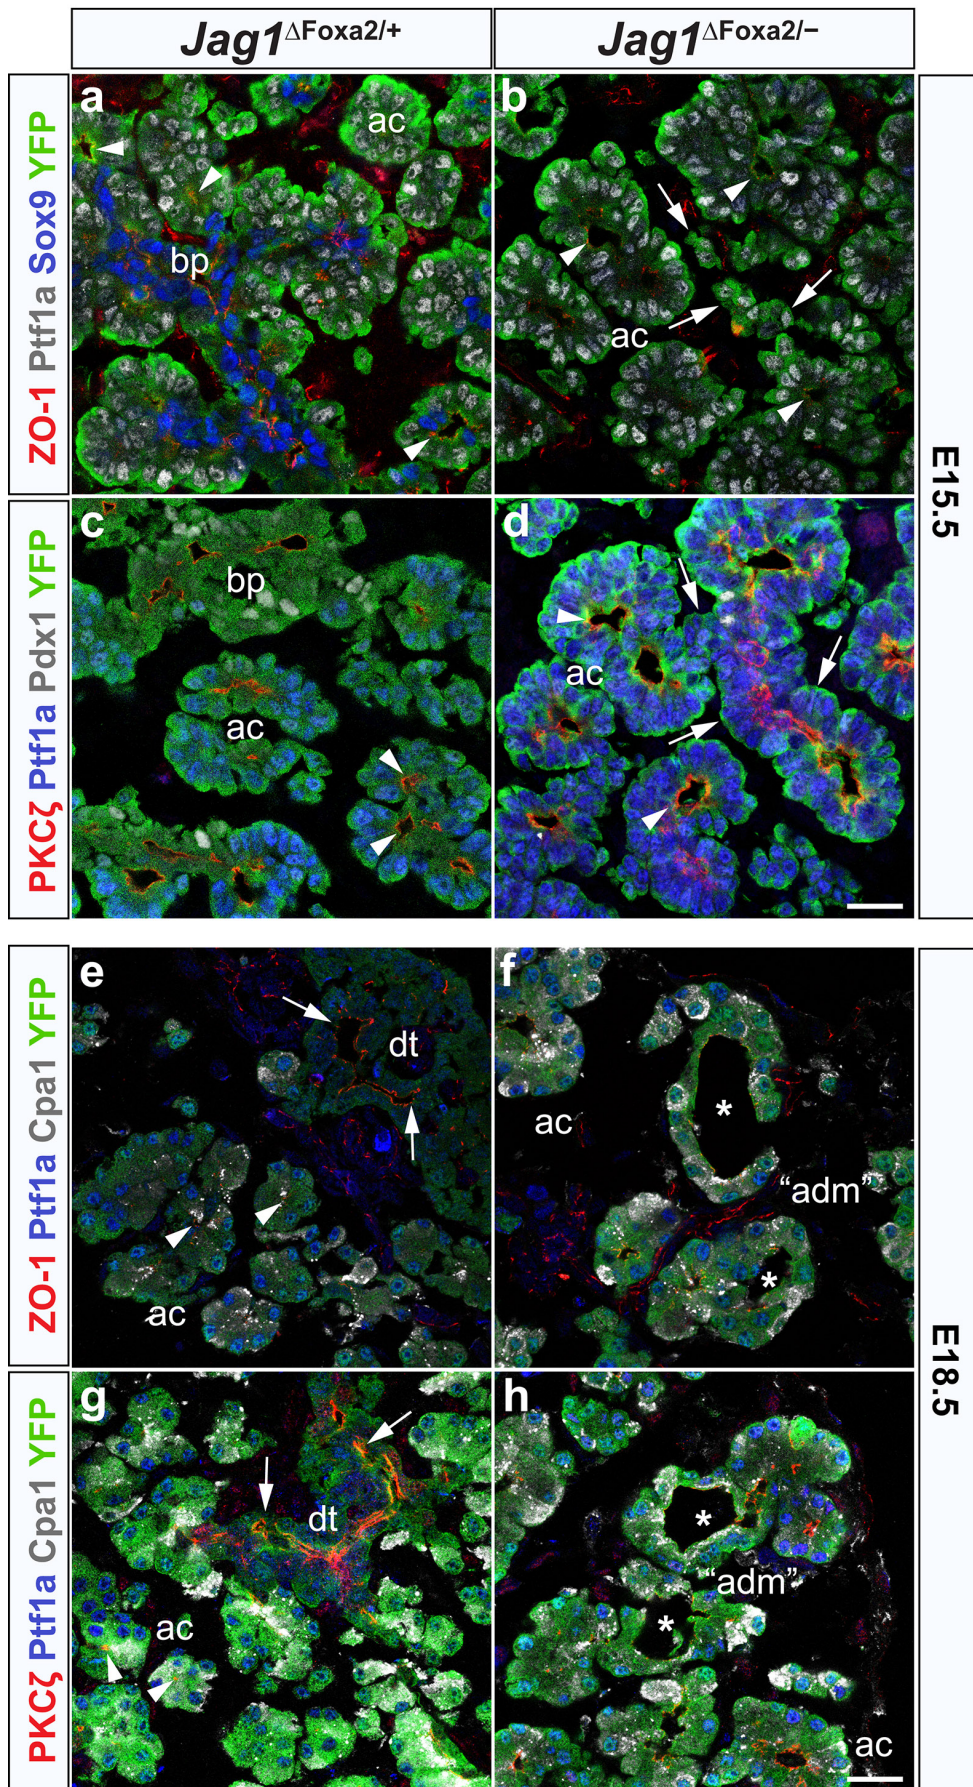

Supplementary Figure 8

**Supplementary Fig. 8.** Apicobasal polarity is retained in E15.5 *Jag1*<sup>ΔFoxa2</sup> acini but lost prior to birth. **a-h** Sections of E15.5 **a-d** and E18.5 **e-h** *Jag1*<sup>ΔFoxa2/+</sup> **a, c, e, g** and *Jag1*<sup>ΔFoxa2/-</sup> **b, d, f, h** pancreata stained for ZO-1, Ptf1a, Sox9 and YFP **a, b, e, f** and PKCζ, Ptf1a, Cpa1 and YFP **c, d, g, h** as indicated. Note that ZO-1 and PKCζ are found apically in the Ptf1a<sup>+</sup> domain of both controls and at E15.5 (arrowheads in **a-d**). Also note Ptf1a<sup>+</sup> duct-like structures in E15.5 *Jag1*<sup>ΔFoxa2/-</sup> mutants (arrows in **b** and **d**). At E18.5 however, apical ZO-1 and PKCζ are downregulated in YFP<sup>+</sup>Ptf1a<sup>+</sup>Cpa1<sup>+</sup> ADM-like structures (“adm”, asterisks in **f** and **h**) in the *Jag1*<sup>ΔFoxa2/-</sup> pancreas, while still expressed on Ptf1a<sup>+</sup>Cpa1<sup>+</sup> acinar cells (arrowheads in **e** and **g**) and in duct cells (arrows in **e** and **g**) in control mice. Scale bars, 25 μm. ac: acini, bp: bi-potent progenitor domain, dt: ducts, “adm”: ADM-like structures.



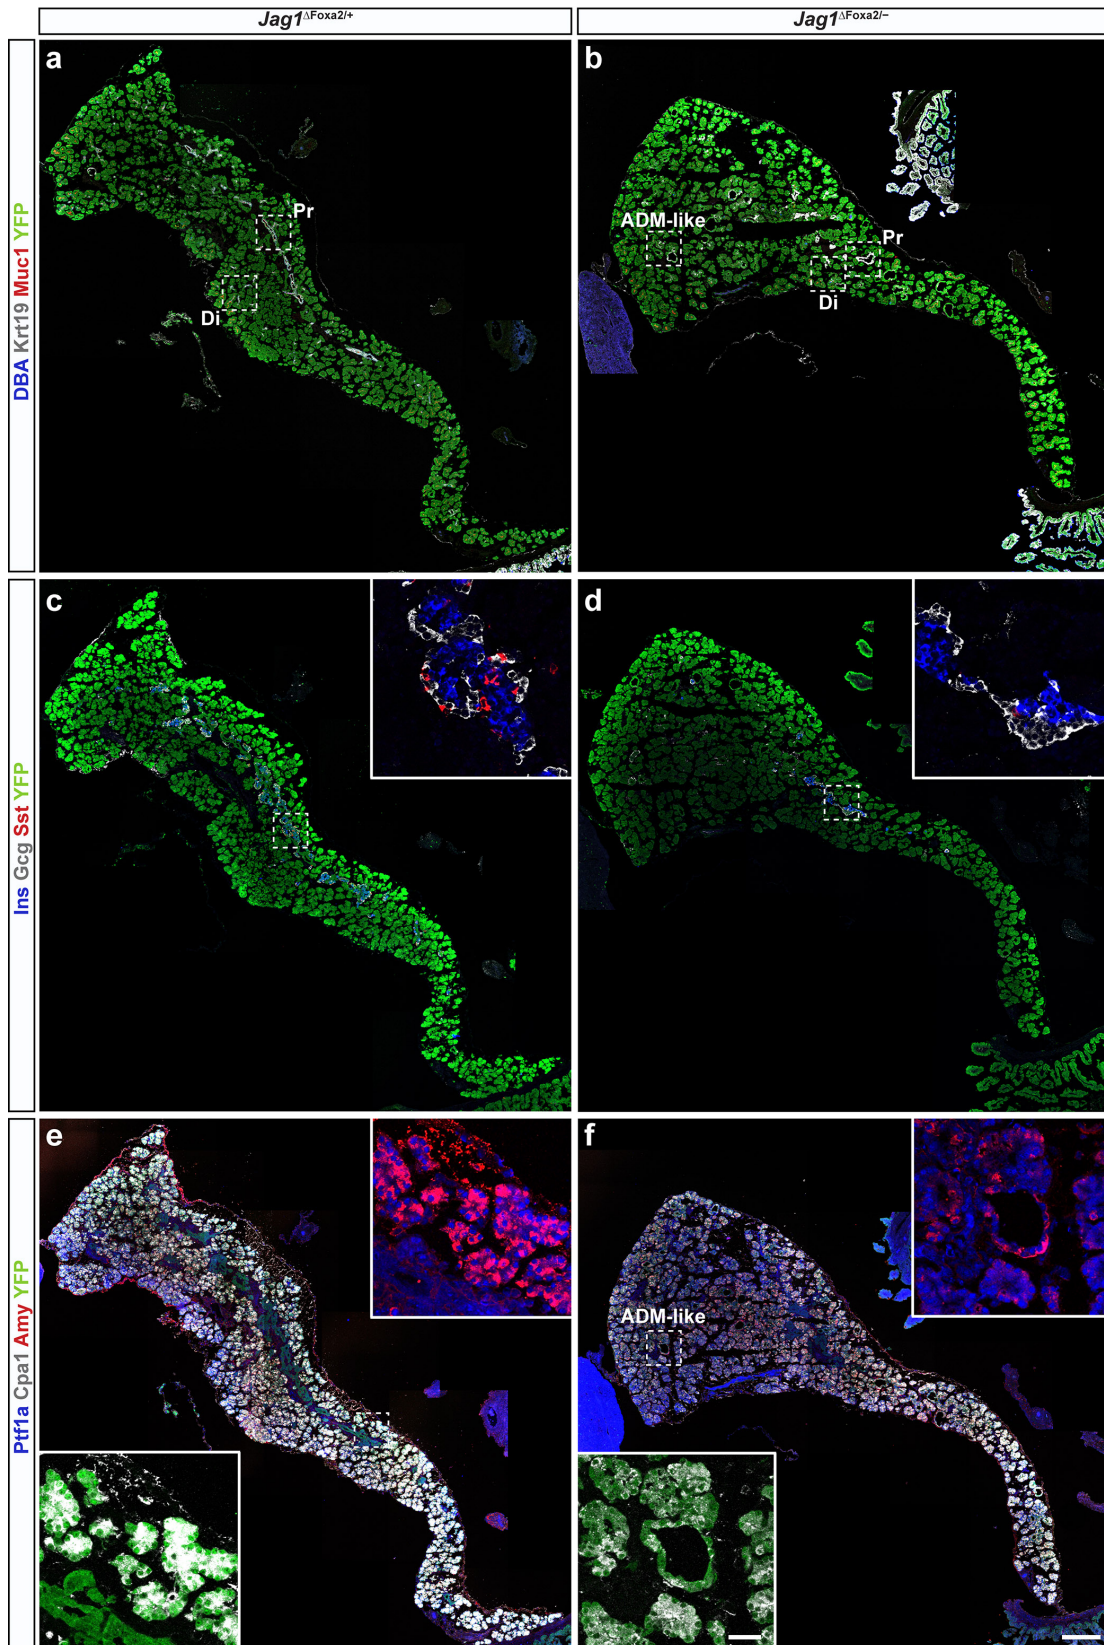

Supplementary Figure 9

**Supplementary Fig. 9.** Ductal malformations, endocrine hypoplasia and ADM-like lesions in late development. **a-f** Composite low magnification panels of ~10 separate



images stitched together to cover the entire dorsal pancreas of E18.5 *Jag1*<sup>ΔFoxa2/+</sup> **a, c, e** and *Jag1*<sup>ΔFoxa2/-</sup> **b, d, f** embryos. **a, b** IF for Muc1, Cytokeratin 19 (Krt19), and DBA as indicated reveals discontinuous, dispersed ductal structures in the E18.5 *Jag1*<sup>ΔFoxa2</sup> pancreas in contrast to the extensive, continuous ductal tree of control littermates. Boxed areas are shown in high magnification in Fig. 7b-k. **c, d** IF for insulin (Ins), glucagon (Gcg) and somatostatin (Sst) as indicated shows a greater extent of loss of the late-arising Sst<sup>+</sup>  $\delta$ -cells than of either Ins<sup>+</sup>  $\beta$ -cells or Gcg<sup>+</sup>  $\alpha$ -cells in the E18.5 *Jag1*<sup>ΔFoxa2/-</sup> pancreas compared with control littermates. **e, f** Expression of the acinar markers amylase (Amy) and Cpa1 is retained in acinar cells of E18.5 *Jag1*<sup>ΔFoxa2/-</sup> as well as in control littermates, including in the dilated ADM-like structures although aberrantly located basally (inset in **f**). Note that the Amy<sup>+</sup>Cpa1<sup>+</sup> ADM-like structures also express Krt19 (the insets labeled ADM-like in **b** and **f** are from the same region of adjacent sections). Some insets are displayed without the YFP channel for the sake of clarity. Scale bars, 250  $\mu$ m (main panels) and 25  $\mu$ m (insets).

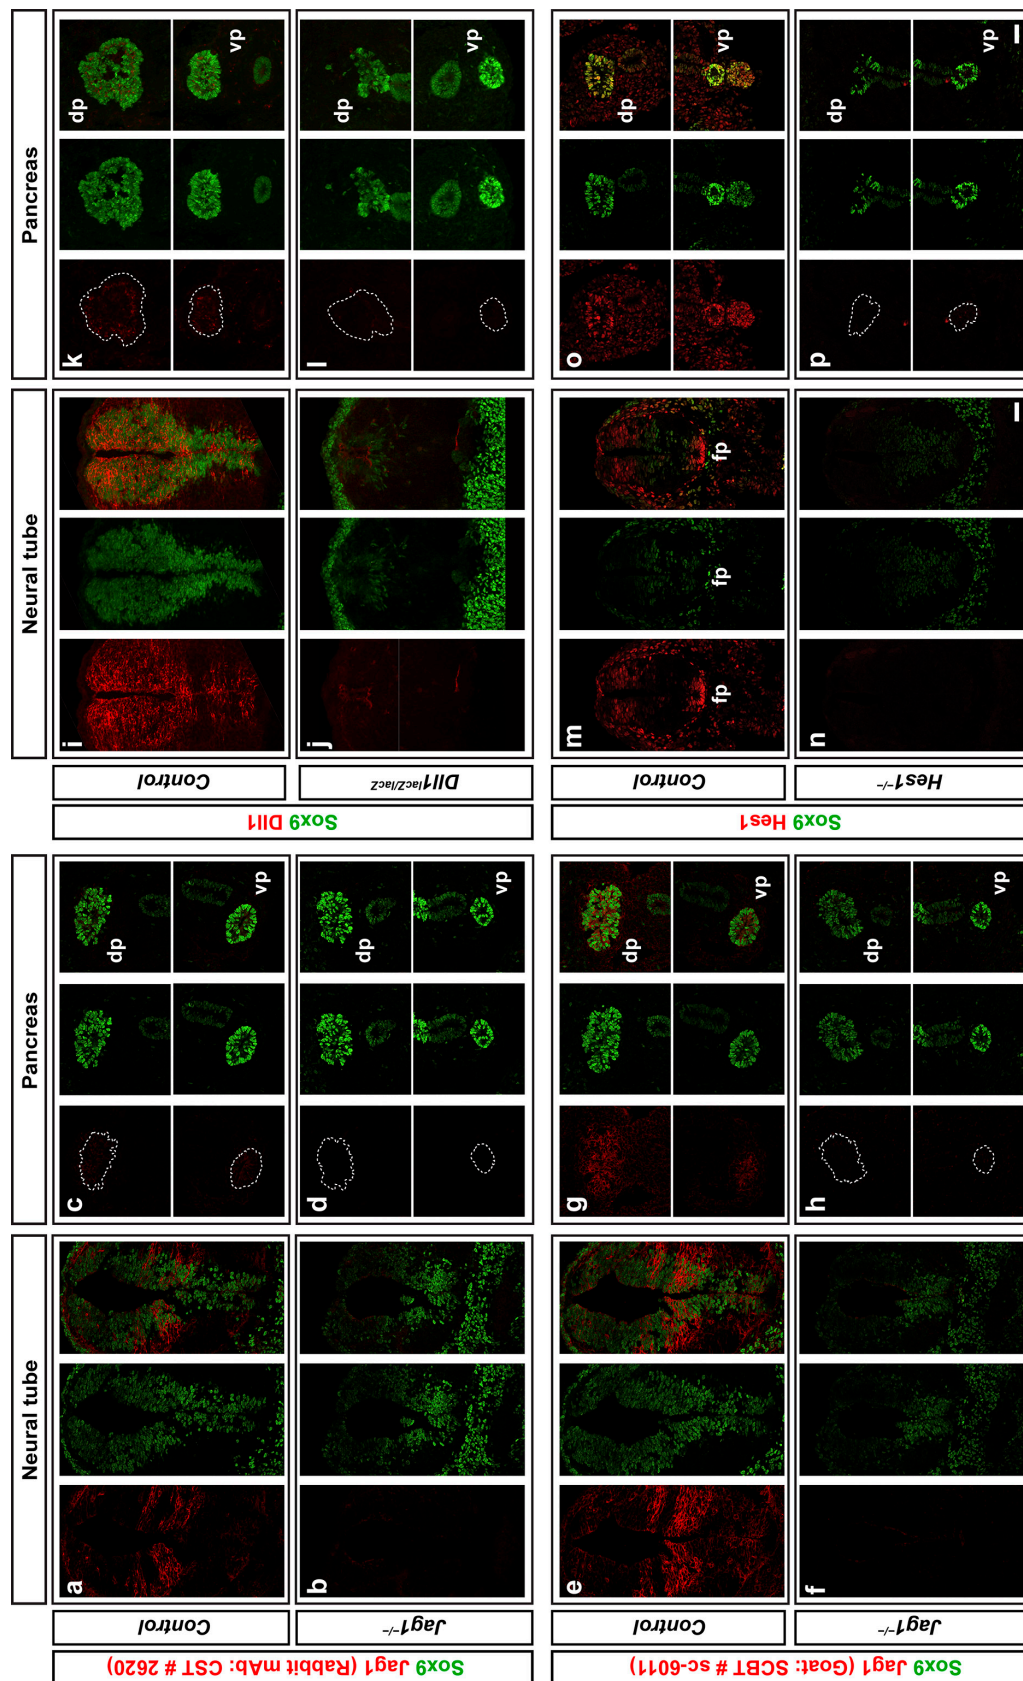

Supplementary Figure 10

**Supplementary Fig. 10.** Validation of anti-Dll1, -Jag1 and -Hes1 antisera. **a-d** Rabbit monoclonal anti-Jag1 antibody (Cell Signaling Technology #2620) gives a membranous signal on cells in the neural tube **a, b** and a weaker but specific membranous staining

throughout both pancreatic buds **c, d** in E10.5 control mice **a, c** but not *Jag1*<sup>-/-</sup> littermates **b, d. e-h** Similarly, goat anti-Jag1 antibody (Santa Cruz Biotechnology: #sc-6011) gives membranous signal on cells in the neural tube **e, f** and weaker but specific membranous staining throughout both pancreatic buds **g, h** in E10.5 control embryos **e, g** but not *Jag1*<sup>-/-</sup> littermates **f, h. i-l** Sheep anti-Dll1 antibody (R&D Systems: #AF3970) yields heterogeneous membranous signal on cells in the neural tube **i, j** and weaker but specific signal in dorsal (dp) and ventral (vp) pancreas **k, l** in E10.5 control embryos **i, k**, but not nullizygous *Dll1*<sup>lacZ/lacZ</sup> littermates **j, l. m-p** Rabbit monoclonal anti-Hes1 antibody (Cell Signaling Technology: #11988) yields strong nuclear Hes1 signal in the dorsal neural tube and floorplate (fp) **m, n** and throughout both pancreatic buds **o, p** in E10.25 control embryos **m, o** but not *Hes1*<sup>-/-</sup> littermates **n, p**. Scale bars, 50  $\mu$ m. Sox9 signal is shown for reference. Weak signals in pancreatic buds compared to neural tube are visualized by enhancing the brightness equally for control and nullizygous images in Adobe Photoshop.

### Supplementary Table 1

Genotyping primers.

D1VmC genotyping primers: Fwd: 5'-CTTCAAAGGACACCAAGTACCAGTCG-3', WT-Rev: 5'-CTGTCCATAGTGCAATGGGAACAACC 3', Venus-Rev: 5' CTTGCTCACCATAAAGATGCGACCTCC 3'

J1VmC genotyping primers: Fwd: 5' CAACACGGTCCCCATTAAGGATTACGAG 3', WT-Rev: 5' CTGTCCATAGTGCAATGGGAACAACC 3', Venus-Rev: as above.

*Sox17*<sup>CreERT2</sup>: Genotyping primers: Fwd: 5'-TGCCACGACCAAGTGACAGC-3', Rev: 5'-CCAGGTTACGGATATAGTTCATG-3'



**Supplemental Table 2. Antibodies employed in immunofluorescence analyses**

| Primary Antibodies      |                      |                                                           |             |                      |
|-------------------------|----------------------|-----------------------------------------------------------|-------------|----------------------|
| Antigen                 | Species              | Source                                                    | Catalogue # | Dilution             |
| Pdx1                    | Goat                 | NIH Beta Cell Biology Consortium (BCBC)                   | AB2027      | 1:10,000             |
| Sox9                    | Guinea Pig           | Gift from Ole Madsen/Novo Nordisk                         | N/A         | 1:2,000              |
| Sox9                    | Rabbit               | EMD Millipore (Merck)                                     | AB5535      | 1:1,000              |
| Ptf1a                   | Rabbit               | NIH BCBC                                                  | AB2153      | 1:3,000              |
| Ptf1a                   | Guinea Pig           | Gift from Jane E. Johnson, UT Southwestern Medical Center | N/A         | 1:5,000              |
| CPA1                    | Goat                 | R&D Systems                                               | AF2765      | 1:200                |
| Amylase                 | Rabbit               | Sigma-Aldrich (Merck)                                     | A8273       | 1:500 <sup>1</sup>   |
| Mist1                   | Rabbit mAb           | Cell Signaling Technology                                 | 14896       | 1:500 <sup>1</sup>   |
| Nkx6.1                  | Mouse                |                                                           |             | 1:500 <sup>2</sup>   |
| Nkx6.1                  | Rabbit               | NIH BCBC                                                  | AB1069      | 1:2,000 <sup>1</sup> |
| Ngn3                    | Rabbit               | NIH BCBC                                                  | AB2011      | 1:4,000              |
| Ngn3                    | Chicken              | NIH BCBC/Chris V. E. Wright                               | AB3854      | 1:1,000              |
| Chromogranin-A          | Goat                 | Santa Cruz                                                | sc-1488     | 1:200                |
| Insulin                 | Guinea Pig           | Abcam                                                     | ab7842      | 1:200                |
| Insulin                 | Guinea Pig           | Dako (Agilent)                                            | A0564       | 1:800                |
| Glucagon                | Mouse                | Sigma-Aldrich (Merck)                                     | G2654       | 1:800                |
| Glucagon                | Guinea Pig           | Millipore                                                 | 4031-01F    | 1:4,000              |
| Somatostatin            | Rabbit               | Dako (Agilent)                                            | A0566       | 1:2,000 <sup>1</sup> |
| DBA                     | N/A                  | Vector Labs                                               | B-1035      | 1:500 <sup>3</sup>   |
| Krt19 (CK19, TROMA-III) | Rat                  | Developmental Studies Hybridoma Bank                      | N/A         | 1:100 <sup>4</sup>   |
| Muc1                    | Armenian Hamster mAb | Thermo Fisher (Invitrogen)                                | MA5-11202   | 1:200                |
| ZO-1 (R26.4C)           | Rat                  | Developmental Studies Hybridoma Bank                      | N/A         | 1:1,000 <sup>4</sup> |
| PKC $\zeta$             | Rabbit               | Santa Cruz                                                | sc-216      | 1:800                |
| E-Cadherin              | Mouse                | BD Biosciences                                            | 610181      | 1:2,000              |
| E-Cadherin              | Rat                  | Novo Nordisk                                              | N/A         | 1:1,000              |
| Pecam1/CD31             | Rat                  | BD Biosciences                                            | 550274      | 1:50                 |
| Dll1                    | Sheep                | R&D Systems                                               | AF3970      | 1:200                |
| Jag1                    | Goat                 | Santa Cruz Biotechnology                                  | sc-6011     | 1:200                |
| Jag1                    | Rabbit mAb           | Cell Signaling Technology                                 | 2620        | 1:50                 |
| Notch1                  | Sheep                | R&D Systems                                               | AF5267      | 1:200                |
| Notch2                  | Goat                 | R&D Systems                                               | AF1190      | 1:200                |
| Hes1                    | Rabbit mAb           | Cell Signaling Technology                                 | 11988       | 1:200                |
| GFP                     | Chicken              | Abcam                                                     | ab13970     | 1:1,000              |
| GFP                     | Rabbit               | Clontech                                                  | 632460      | 1:1,000              |
| RFP                     | Rabbit               | Rockland                                                  | 600-401-379 | 1:2,000              |

<sup>1</sup> Detected with (1:500) Cy3-conjugated F(ab')<sub>2</sub> fragment donkey anti-rabbit IgG (Jackson ImmunoResearch Europe; 711-166-152)

<sup>2</sup> Blocking and antibody incubations performed using M.O.M. Basic Kit (Vector Labs; BMK-2202)

<sup>3</sup> Biotinylated DBA detected with (30 µg/ml) AMCA Avidin D (Vector Labs; A-2008)

<sup>4</sup> Concentrate
